# Supplementary material for: Rh-Catalyzed oxidative C–H activation/annulation: converting anilines to indoles using molecular oxygen as the sole oxidant
Source: Royal Society of Chemistry journal article supplement (doi:10.1039/c3cc49751h), 2014-01-01

Supporting Information for:

**Rh-Catalyzed Oxidative C-H Activation/Annulation: Converting Anilines to  
Indoles with Molecular Oxygen as Sole Oxidant**

Guoying Zhang, Hui Yu, Guiping Qin, Hanmin Huang\*

State Key Laboratory for Oxo Synthesis and Selective Oxidation, Lanzhou Institute of  
Chemical Physics, Chinese Academy of Sciences, Lanzhou 730000, P. R. China

E-mail: hmhuang@licp.cas.cn

**CONTENTS**

- 1 General experimental details and materials**
- 2 Optimization of the reaction conditions**
- 3 General procedure for the C-H activation/annulation**
- 4 Experimental characterization data for products**
- 5 Mechanistic studies**
- 6 References**
- 7 Copies for  $^1\text{H}$  NMR and  $^{13}\text{C}$  NMR of the indole products**

## 1. General experiment details and materials

**Experimental:** All non-aqueous reactions and manipulations were using standard Schlenk techniques. All solvents were purchased from Alfa Aesar, and before use were dried and degassed by standard methods and stored under argon atmosphere. All reactions were monitored by TLC with silica gel-coated plates. NMR spectra were recorded on BRUKER Avance III 400 MHz spectrometers. Chemical shifts were reported in parts per million (ppm) down field from TMS with the solvent resonance as the internal standard. Coupling constants (J) were reported in Hz and referred to apparent peak multiplications. High resolution mass spectra (HRMS) were recorded on Bruker MicroTOF-QII mass instrument (ESI) or Waters GCT Premier mass spectrometer (EI). Anilines used here are known compounds. 1,2-diphenylethyne and prop-1-ynylbenzene were purchased from Alfa Aesar. The other alkynes used here are known compounds and synthesized according to the reported methods.<sup>1</sup>  $\text{Cp}^*\text{Rh}(\text{H}_2\text{O})_3(\text{OTf})_2$ ,  $\text{Cp}^*\text{Rh}(\text{H}_2\text{O})(\text{OAc})_2$  and  $\text{Cp}^*\text{Rh}(\text{CH}_3\text{CN})_3(\text{SbF}_6)_2$ ,  $[\{\text{RhCp}^*\text{Cl}_2\}_2]$ , used here are known compounds and synthesized according to the reported methods.<sup>2</sup>

## 2. Optimization of the reaction conditions

Diphenylethyne **2a** (71.3 mg, 0.4 mmol), [Rh] catalyst (0.02 mmol, 5 mol%), aniline **1a** (55.0  $\mu\text{L}$ , 0.6 mmol), solvent (2.0 mL) and  $\text{Ac}_2\text{O}$  (57.0  $\mu\text{L}$ , 0.6 mmol) were added to a 25 mL flame-dried Young-type tube. The mixture was degassed by the freeze-thaw method and supplied with 1 atm of oxygen, and then stirred at design temperature for 24 hours. After cooling to room temperature, NaOH (48.0 mg, 1.2 mmol) and  $\text{CH}_3\text{OH}$  (2.0 mL) were added to the reaction mixture, and then stirred at room temperature for another one hour. After evaporation of the solvents under reduced pressure, the residue was directly loaded onto a silica gel column (petroleum ether/ethyl acetate = 100/1) to afford the desired product **3aa** as a white solid.

**Table 1.** Optimization of the reaction conditions<sup>a</sup>

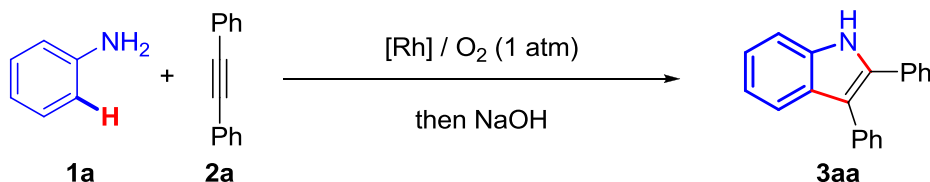

| Entry     | [Rh] (5 mol%)                                                                | Additive                                | T/ $^{\circ}\text{C}$ | Solvent                                    | Yield (%) <sup>b</sup> |
|-----------|------------------------------------------------------------------------------|-----------------------------------------|-----------------------|--------------------------------------------|------------------------|
| 1         | $\text{Cp}^*\text{Rh}(\text{H}_2\text{O})_3(\text{OTf})_2$                   | $\text{Ac}_2\text{O}$                   | 40                    | <i>t</i> -AmOH                             | 70                     |
| 2         | $\text{Cp}^*\text{Rh}(\text{H}_2\text{O})_3(\text{OTf})_2$                   | $\text{Ac}_2\text{O}$                   | 40                    | <i>t</i> -BuOH                             | 18                     |
| 3         | $\text{Cp}^*\text{Rh}(\text{H}_2\text{O})_3(\text{OTf})_2$                   | $\text{Ac}_2\text{O}$                   | 40                    | $\text{CH}_3\text{OH}$                     | <5                     |
| 4         | $\text{Cp}^*\text{Rh}(\text{H}_2\text{O})_3(\text{OTf})_2$                   | $\text{Ac}_2\text{O}$                   | 40                    | DMF                                        | <5                     |
| 5         | $\text{Cp}^*\text{Rh}(\text{H}_2\text{O})_3(\text{OTf})_2$                   | $\text{Ac}_2\text{O}$                   | 40                    | $\text{CH}_3\text{C}(\text{O})\text{CH}_3$ | 49                     |
| 6         | $\text{Cp}^*\text{Rh}(\text{CH}_3\text{CN})_3(\text{SbF}_6)_2$               | $\text{Ac}_2\text{O}$                   | 40                    | <i>t</i> -AmOH                             | <5                     |
| 7         | $[\{\text{RhCp}^*\text{Cl}_2\}_2]$                                           | $\text{Ac}_2\text{O}$                   | 40                    | <i>t</i> -AmOH                             | 0                      |
| 8         | $\text{Cp}^*\text{Rh}(\text{H}_2\text{O})(\text{OAc})_2$                     | $\text{Ac}_2\text{O}$                   | 40                    | <i>t</i> -AmOH                             | <5                     |
| 9         | $\text{Cp}^*\text{Rh}(\text{H}_2\text{O})_3(\text{OTf})_2$                   | $\text{Ac}_2\text{O}$                   | 60                    | <i>t</i> -AmOH                             | 80                     |
| 10        | $\text{Cp}^*\text{Rh}(\text{H}_2\text{O})_3(\text{OTf})_2$                   | $\text{Ac}_2\text{O}$                   | 80                    | <i>t</i> -AmOH                             | 79                     |
| <b>11</b> | <b><math>\text{Cp}^*\text{Rh}(\text{H}_2\text{O})_3(\text{OTf})_2</math></b> | <b><math>\text{Ac}_2\text{O}</math></b> | <b>100</b>            | <b><i>t</i>-AmOH</b>                       | <b>84</b>              |
| 12        | $\text{Cp}^*\text{Rh}(\text{H}_2\text{O})_3(\text{OTf})_2$                   | $\text{Ac}_2\text{O}$                   | 120                   | <i>t</i> -AmOH                             | 81                     |
| 13        | $\text{Cp}^*\text{Rh}(\text{H}_2\text{O})_3(\text{OTf})_2$                   | $\text{Ac}_2\text{O}$                   | rt                    | <i>t</i> -AmOH                             | 44                     |
| 14        | $\text{Cp}^*\text{Rh}(\text{H}_2\text{O})_3(\text{OTf})_2$                   | $\text{Ac}_2\text{O}$                   | 100                   | <i>t</i> -AmOH                             | <5 <sup>c</sup>        |
| 15        | $\text{Cp}^*\text{Rh}(\text{H}_2\text{O})_3(\text{OTf})_2$                   | $(\text{CF}_3\text{CO})_2\text{O}$      | 100                   | <i>t</i> -AmOH                             | 0                      |
| 16        | $\text{Cp}^*\text{Rh}(\text{H}_2\text{O})_3(\text{OTf})_2$                   | $(\text{CF}_3\text{SO}_2)_2\text{O}$    | 100                   | <i>t</i> -AmOH                             | 0                      |
| 17        | $\text{Cp}^*\text{Rh}(\text{H}_2\text{O})_3(\text{OTf})_2$                   | HOAc                                    | 100                   | <i>t</i> -AmOH                             | 0                      |
| 18        | $\text{Cp}^*\text{Rh}(\text{H}_2\text{O})_3(\text{OTf})_2$                   | --                                      | 100                   | <i>t</i> -AmOH                             | 0                      |
| 19        | --                                                                           | $\text{Ac}_2\text{O}$                   | 100                   | <i>t</i> -AmOH                             | 0                      |

<sup>a</sup> General conditions: **1a** (55.0  $\mu\text{L}$ , 0.6 mmol), **2a** (71.3 mg, 0.4 mmol), [Rh] catalyst (0.02 mmol, 5 mol %), additive (0.6 mmol), solvents (2.0 mL), oxygen (1 atm), for 24 h, unless otherwise noted. <sup>b</sup> Isolated yield. <sup>c</sup> Under argon.

### 3. General procedure for the C-H activation/annulation

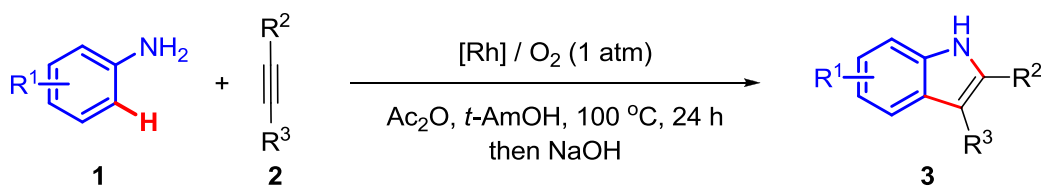

Alkynes **2** (0.4 mmol), Cp\**Rh*(H<sub>2</sub>O)<sub>3</sub>(OTf)<sub>2</sub> (11.8 mg, 0.02 mmol, 5 mol%), anilines **1** (0.6 mmol), *t*-AmOH (2.0 mL) and Ac<sub>2</sub>O (57.0 μL, 0.6 mmol) were added to a 25 mL flame-dried Young-type tube. The mixture was degassed by the freeze-thaw method and supplied with 1 atm of oxygen, and then stirred at 100 °C or 40 °C for 24 hours. After cooling to room temperature, NaOH (48.0 mg, 1.2 mmol) and CH<sub>3</sub>OH (2.0 mL) were added to the reaction mixture, and then stirred at room temperature for another one hour. After evaporation of the solvents under reduced pressure, the residue was directly loaded onto a silica gel column (petroleum ether/ethyl acetate = 100/1 – 5:1) to afford the desired products **3**.

#### 4. Experimental characterization data for products of 3.

##### 2,3-Diphenyl-1H-indole (3aa):<sup>3</sup>

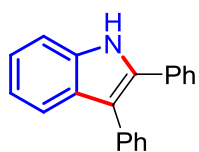

The title compound was prepared according to the general procedure as a white solid, 90.3 mg, 84% yield. <sup>1</sup>H NMR (400 MHz, CDCl<sub>3</sub>) δ 7.13-7.17 (m, 1H), 7.21-7.45 (m, 12H), 7.67 (d, *J* = 7.68, 1H), 8.18 (br, 1H); <sup>13</sup>C NMR (100 MHz, CDCl<sub>3</sub>) δ 110.9, 115.0, 119.7, 120.4, 122.7, 126.2, 127.7, 128.1, 128.5, 128.7, 128.7, 130.1, 132.7, 134.0, 135.0, 135.9. HRMS (EI) calcd. for C<sub>20</sub>H<sub>15</sub>N [M]: 269.1204, found: 269.1205.

##### 5-Methyl-2,3-diphenyl-1H-indole (3ba):<sup>4</sup>

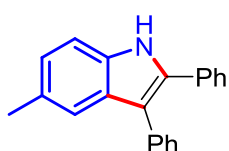

The title compound was prepared according to the general procedure as a white solid, 105.6 mg, 93% yield. <sup>1</sup>H NMR (400 MHz, CDCl<sub>3</sub>) δ 2.44 (s, 3H), 7.06-7.08 (m, 1H), 7.25-7.33 (m, 5H), 7.36-7.45 (m, 7H), 8.13 (br, 1H); <sup>13</sup>C NMR (100 MHz, CDCl<sub>3</sub>) δ 21.6, 110.6, 114.7, 119.3, 124.3, 126.2, 127.6, 128.1, 128.5, 128.7, 129.1, 129.8, 130.2, 132.9, 134.2, 134.2, 135.2; HRMS (ESI) calcd. for C<sub>21</sub>H<sub>18</sub>N [M+H]: 284.1434, found: 284.1436.

##### 6-Methyl-2,3-diphenyl-1H-indole (3ca):<sup>5</sup>

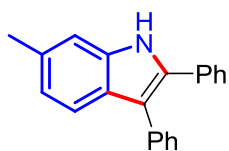

The title compound was prepared according to the general procedure as a white solid, 80.1 mg, 71% yield. <sup>1</sup>H NMR (400 MHz, CDCl<sub>3</sub>) δ 2.34 (s, 3H), 6.86-6.88 (m, 1H), 7.03 (s, 1H), 7.13-7.19 (m, 4H), 7.23-7.27 (m, 4H), 7.31-7.33 (m, 2H), 7.45 (d, *J* = 8.14, 1H), 7.86 (br, 1H); <sup>13</sup>C NMR (100 MHz, CDCl<sub>3</sub>) δ 21.7, 110.8, 114.8, 119.3, 122.2, 126.1, 126.6, 127.4, 128.0, 128.5, 128.6, 130.1, 132.6, 132.8, 133.4, 135.2, 136.3; HRMS (ESI) calcd. for C<sub>21</sub>H<sub>18</sub>N [M+H]: 284.1434, found: 284.1435.

##### 5-tert-butyl-2,3-diphenyl-1H-indole (3da):

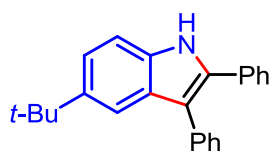

The title compound was prepared according to the general procedure as a white solid, 120.1 mg, 92% yield. <sup>1</sup>H NMR (400 MHz, CDCl<sub>3</sub>) δ 1.36 (s, 9H), 7.23-7.45 (m, 12H), 7.67 (s, 1H), 8.06 (br, 1H); <sup>13</sup>C NMR (100 MHz, CDCl<sub>3</sub>) δ 32.0, 34.8, 110.5, 115.2, 115.4, 121.2, 126.2, 127.6, 128.3, 128.5, 128.7, 128.7, 130.3, 133.0, 134.2, 134.5, 135.4, 143.6; HRMS (ESI) calcd. for C<sub>24</sub>H<sub>23</sub>NNa [M+Na]: 348.1710, found: 348.1723.

### 6-tert-butyl-2,3-diphenyl-1H-indole (3ea):

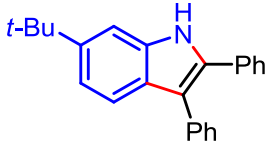 The title compound was prepared according to the general procedure as a white solid, 110.4 mg, 84% yield. <sup>1</sup>H NMR (400 MHz, CDCl<sub>3</sub>) δ 1.40 (s, 9H), 7.22-7.44 (m, 12H), 7.60 (d, *J* = 8.4 Hz, 1H), 8.13 (br, 1H); <sup>13</sup>C NMR (100 MHz, CDCl<sub>3</sub>) δ 31.8, 34.9, 107.2, 114.9, 118.8, 119.2, 126.1, 126.5, 127.5, 128.1, 128.5, 128.7, 130.1, 133.0, 133.9, 135.3, 136.1, 146.4; HRMS (EI) calcd. for C<sub>24</sub>H<sub>23</sub>N [M]: 325.1830, found: 325.1833.

### 5-Methoxy-2,3-diphenyl-1H-indole (3fa):<sup>5</sup>

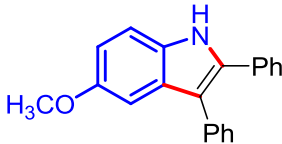 The title compound was prepared according to the general procedure as a white solid, 107.4 mg, 90% yield. <sup>1</sup>H NMR (400 MHz, CDCl<sub>3</sub>) δ 3.82 (s, 3H), 6.89 (dd, *J*<sub>1</sub> = 8.8 Hz, *J*<sub>2</sub> = 2.5 Hz, 1H), 7.12 (d, *J* = 2.4 Hz, 1H), 7.25-7.33 (m, 5H), 7.36-7.44 (m, 6H), 8.12 (b, 1H); <sup>13</sup>C NMR (100 MHz, CDCl<sub>3</sub>) δ 55.9, 101.3, 111.7, 113.0, 115.0, 126.2, 127.6, 128.1, 128.6, 128.7, 129.2, 130.1, 131.1, 132.8, 135.0, 135.2, 154.8; HRMS (ESI) calcd. for C<sub>21</sub>H<sub>18</sub>NO [M+H]: 300.1383 found: 300.1384.

### 4,6-Dimethoxy-2,3-diphenyl-1H-indole (3ga):

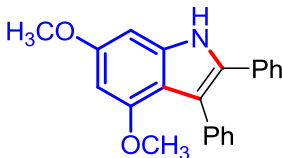 The title compound was prepared according to the general procedure as a white solid, 80.2 mg, 61% yield. <sup>1</sup>H NMR (400 MHz, DMSO-*d*<sub>6</sub>) δ 3.60 (s, 3H), 3.80 (s, 3H), 6.17 (d, *J* = 1.92 Hz, 1H), 6.56 (d, *J* = 1.92 Hz, 1H), 7.19-7.29 (m, 10H), 11.36 (br, 1H); <sup>13</sup>C NMR (100 MHz, DMSO-*d*<sub>6</sub>) δ 54.9, 55.2, 86.8, 91.8, 112.2, 113.5, 125.7, 126.6, 127.2, 127.7, 128.2, 128.7, 131.1, 131.3, 131.6, 132.8, 136.4, 137.6, 154.4, 156.9; HRMS (ESI) calcd. for C<sub>22</sub>H<sub>20</sub>NO<sub>2</sub> [M+H]: 330.1489, found: 330.1491.

### 5,6-Dimethoxy-2,3-diphenyl-1H-indole (3ha):<sup>6</sup>

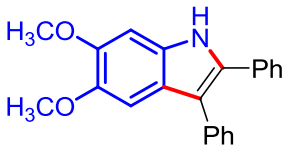 The title compound was prepared according to the general procedure as a white solid, 100.7 mg, 76% yield. <sup>1</sup>H NMR (400 MHz, CDCl<sub>3</sub>) δ 3.89 (s, 3H), 3.94 (s, 3H), 6.94 (s, 1H), 7.09 (s, 1H), 7.28-7.44 (m, 10H), 8.10 (br, 1H); <sup>13</sup>C NMR (100 MHz, DMSO-*d*<sub>6</sub>) δ 55.7, 55.8, 94.9, 100.7, 113.3, 120.7, 125.9, 126.9, 127.7, 128.4, 128.7, 129.6, 130.6, 132.3, 132.8, 135.6, 145.1, 147.1. HRMS (EI) calcd. for C<sub>22</sub>H<sub>19</sub>NO<sub>2</sub> [M]: 329.1416, found: 329.1418.

### 2,3-Diphenyl-5-(trifluoromethoxy)-1H-indole (3ia):

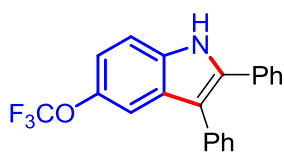

The title compound was prepared according to the general procedure as a white solid, 110.0 mg, 78% yield.  $^1\text{H}$  NMR (400 MHz,  $\text{CDCl}_3$ )  $\delta$  6.98-7.01 (m, 1H), 7.17-7.29 (m, 11H), 7.42 (s, 1H), 8.13 (br, 1H);  $^{13}\text{C}$  NMR (100 MHz,  $\text{CDCl}_3$ )  $\delta$  110.5, 111.2, 114.3, 115.5, 116.0 (q,  $J = 254$  Hz), 125.6, 127.1, 127.1, 127.5, 127.7, 127.7, 128.0, 128.9, 131.0, 133.1, 133.2, 135.0, 142.6, 142.6;  $^{19}\text{F}$  NMR (376 MHz,  $\text{CDCl}_3$ )  $\delta$  -57.88. HRMS (EI) calcd. for  $\text{C}_{21}\text{H}_{14}\text{F}_3\text{NO}$  [M]: 353.1027, found: 353.1028.

### 5-Fluoro-2,3-diphenyl-1H-indole (3ja):<sup>4</sup>

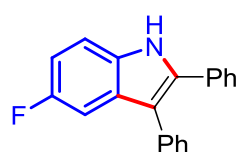

The title compound was prepared according to the general procedure as a white solid, 87.3 mg, 76% yield.  $^1\text{H}$  NMR (400 MHz,  $\text{CDCl}_3$ )  $\delta$  6.93-6.98 (m, 1H), 7.25-7.39 (m, 12H), 8.14 (br, 1H);  $^{13}\text{C}$  NMR (100 MHz,  $\text{CDCl}_3$ )  $\delta$  104.5 (d,  $J = 24$  Hz), 110.9 (d,  $J = 27$  Hz), 111.6 (d,  $J = 10$  Hz), 115.2 (d,  $J = 5$  Hz), 126.5, 128.0, 128.2, 128.7, 128.8, 129.2 (d,  $J = 10$  Hz), 130.0, 132.4 (d,  $J = 4$  Hz), 134.7, 135.9, 157.4 (d,  $J = 34$  Hz);  $^{19}\text{F}$  NMR (376 MHz,  $\text{CDCl}_3$ )  $\delta$  -123.45. HRMS (EI) calcd. for  $\text{C}_{20}\text{H}_{14}\text{FN}$  [M]: 287.1110, found: 287.1098.

### 5-Chloro-2,3-diphenyl-1H-indole (3ka):<sup>4</sup>

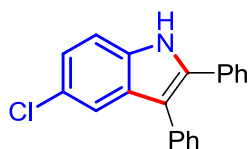

The title compound was prepared according to the general procedure as a white solid, 109.7 mg, 90% yield.  $^1\text{H}$  NMR (400 MHz,  $\text{CDCl}_3$ )  $\delta$  7.16 (dd,  $J_1 = 8.6$  Hz,  $J_2 = 2.04$  Hz, 1H), 7.27-7.34 (m, 5H), 7.35-7.41 (m, 6H), 7.62-7.63 (m, 1H), 8.21 (br, 1H);  $^{13}\text{C}$  NMR (100 MHz,  $\text{CDCl}_3$ )  $\delta$  111.9, 114.8, 119.2, 123.0, 126.2, 126.6, 128.1, 128.1, 128.7, 128.8, 129.9, 130.0, 132.2, 134.2, 134.4, 135.4. HRMS (EI) calcd. for  $\text{C}_{20}\text{H}_{14}\text{ClN}$  [M]: 303.0815, found: 303.0813.

### 4-Chloro-2,3-diphenyl-1H-indole (3la) and

### 6-Chloro-2,3-diphenyl-1H-indole (3la') (1.08:1, Determined by NMR):<sup>4</sup>

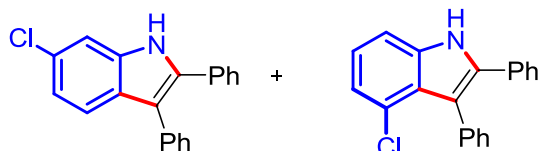

The title compound was prepared according to the general procedure as a white solid, 59.2 mg, 49% yield.  $^1\text{H}$  NMR (400 MHz,  $\text{CDCl}_3$ )  $\delta$  7.09 (d,  $J = 1.88$  Hz, 0.48H), 7.11 (d,  $J = 1.88$  Hz, 0.52H), 7.27-7.41 (m, 11H), 7.54 (s, 0.51H), 7.57 (s, 0.49H), 8.19 (br, 0.95H);  $^{13}\text{C}$  NMR (100 MHz,  $\text{CDCl}_3$ )  $\delta$  110.8, 115.1, 120.6, 121.2,

126.5, 127.4, 128.0, 128.1, 128.4, 128.7, 128.8, 130.1, 132.2, 134.5, 134.6, 136.2; HRMS (EI) calcd. for C<sub>20</sub>H<sub>14</sub>CIN [M]: 303.0815, found: 303.0813.

### 5-Bromo-2,3-diphenyl-1H-indole (3ma)<sup>5</sup>

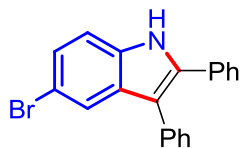

The title compound was prepared according to the general procedure as a white solid, 125.9 mg, 90% yield. <sup>1</sup>H NMR (400 MHz, CDCl<sub>3</sub>) δ 7.24-7.33 (m, 6H), 7.38-7.41 (m, 6H), 7.77 (t, *J* = 0.76 Hz, 1H), 8.24 (br, 1H); <sup>13</sup>C NMR (100 MHz, CDCl<sub>3</sub>) δ 112.3, 113.7, 114.7, 122.2, 125.5, 126.6, 128.1, 128.1, 128.7, 128.8, 130.1, 130.6, 132.1, 134.3, 134.5, 135.2. HRMS (EI) calcd. for C<sub>20</sub>H<sub>14</sub>BrN [M]: 347.0310, found: 347.0308.

### 2,3-Diphenyl-1H-indole-5-carbonitrile (3na)<sup>7</sup>

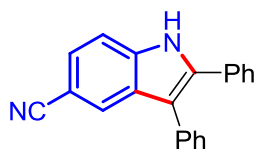

The title compound was prepared according to the general procedure as a white solid, 36.0 mg, 31% yield. <sup>1</sup>H NMR (400 MHz, DMSO-*d*<sub>6</sub>) δ 7.33-7.49 (m, 10H), 7.52-7.55 (m, 1H), 7.61 (d, *J* = 8.4 Hz, 1H), 7.90 (m, 1H), 12.21 (br, 1H); <sup>13</sup>C NMR (100 MHz, DMSO-*d*<sub>6</sub>) δ 101.8, 112.8, 113.8, 120.5, 124.1, 124.7, 126.7, 127.7, 128.2, 128.3, 128.6, 128.8, 129.7, 131.4, 133.8, 136.6, 137.8; HRMS (ESI) calcd. for C<sub>21</sub>H<sub>15</sub>N<sub>2</sub> [M+H]: 295.1230, found: 295.1233.

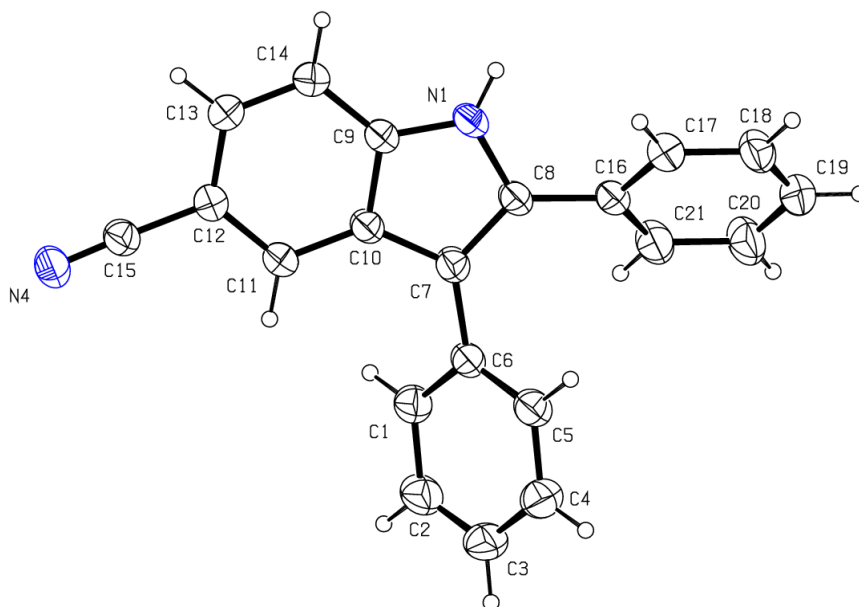

Figure S1. ORTEP drawing of product **3ma**



### Methyl 2,3-diphenyl-1H-indole-5-carboxylate (30a):<sup>7</sup>

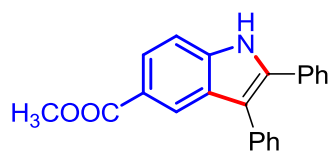

The title compound was prepared according to the general procedure as a white solid, 79.1 mg, 60% yield. <sup>1</sup>H NMR (400 MHz, DMSO-*d*<sub>6</sub>) δ 3.83 (s, 3H), 7.33-7.50 (m, 10H), 7.54 (d, *J* = 8.52, 1H), 7.81-7.84 (m, 1H), 8.15 (d, *J* = 1.36 Hz, 1H), 12.03 (br); <sup>13</sup>C NMR (100 MHz, DMSO-*d*<sub>6</sub>) δ 51.7, 111.5, 114.5, 121.1, 121.1, 123.0, 126.6, 127.7, 128.0, 128.2, 128.6, 128.8, 129.8, 131.8, 134.5, 135.8, 138.6, 167.1; HRMS (ESI) calcd. for C<sub>22</sub>H<sub>18</sub>NO<sub>2</sub> [M+H]: 328.1332, found: 328.1344.

### 2,3-Diphenyl-1H-benzo[*g*]indole (3pa):

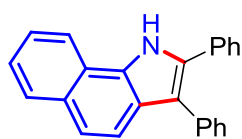

The title compound was prepared according to the general procedure as a white solid, 78.6 mg, 62% yield. <sup>1</sup>H NMR (400 MHz, CDCl<sub>3</sub>) δ 7.28-7.55 (m, 13H), 7.72 (d, *J* = 8.68, 1H), 7.91 (d, *J* = 8.04, 1H), 8.02 (d, *J* = 8.16, 1H), 8.87 (br, 1H); <sup>13</sup>C NMR (100 MHz, CDCl<sub>3</sub>) δ 116.9, 119.4, 119.5, 121.3, 121.5, 124.2, 124.6, 125.7, 126.4, 127.5, 128.1, 128.6, 128.8, 129.0, 130.3, 130.8, 132.5, 132.8, 135.0; HRMS (EI) calcd. for C<sub>24</sub>H<sub>17</sub>N [M]: 319.1361, found: 319.1365.

### 2,3-Di-*p*-tolyl-1H-indole (3ab):<sup>5</sup>

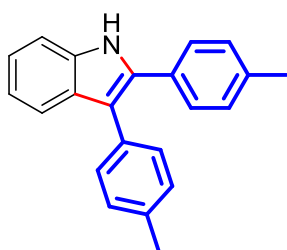

The title compound was prepared according to the general procedure as a white solid, 96.0 mg, 81% yield. <sup>1</sup>H NMR (400 MHz, CDCl<sub>3</sub>) δ 2.23 (s, 3H), 2.28 (s, 3H), 6.99-7.13 (m, 6H), 7.18-7.26 (m, 5H), 7.56 (d, *J* = 7.96, 1H), 7.95 (br, 1H); <sup>13</sup>C NMR (100 MHz, CDCl<sub>3</sub>) δ 21.4, 110.9, 114.6, 119.7, 120.4, 122.5, 128.1, 129.0, 129.4, 129.5, 130.0, 130.1, 132.2, 134.1, 135.8, 135.9, 137.6; HRMS (ESI) calcd. for C<sub>22</sub>H<sub>20</sub>N [M+H]: 298.1590, found: 298.1595.

### 2,3-Bis(4-methoxyphenyl)-1H-indole (3ac):<sup>5</sup>

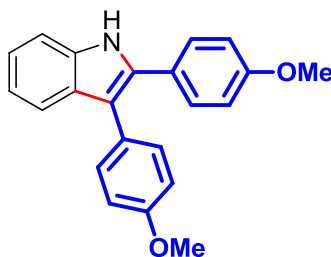

The title compound was prepared according to the general procedure as a white solid, 111.8 mg, 85% yield. <sup>1</sup>H NMR (400 MHz, DMSO-*d*<sub>6</sub>) δ 3.77 (s, 3H), 3.79 (s, 3H), 6.93-7.04 (m, 5H), 7.11-7.15 (m, 1H), 7.25-7.28 (m, 2H), 7.39-7.44 (m, 4H), 11.39 (br, 1H); <sup>13</sup>C NMR (100 MHz, CDCl<sub>3</sub>) δ 55.2, 55.3, 110.7, 113.8, 114.0, 114.2, 119.5, 120.2, 122.3, 125.3, 127.6,

129.0, 129.3, 131.2, 133.7, 135.7, 158.7, 159.1; HRMS (ESI) calcd. for  $C_{22}H_{20}NO_2$  [M+H]: 330.1489, found: 330.1487.

**2,3-Bis(4-fluorophenyl)-1H-indole (3ad):**<sup>5</sup>

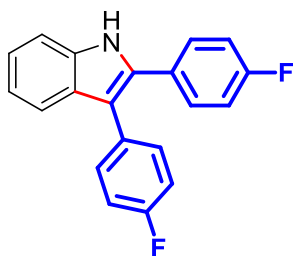

The title compound was prepared according to the general procedure as a white solid, 93.0 mg, 76% yield.  $^1H$  NMR (400 MHz,  $CDCl_3$ )  $\delta$  6.98-7.08 (m, 4H), 7.13-7.17 (m, 1H), 7.21-7.26 (m, 1H), 7.31-7.39 (m, 5H), 7.60 (d,  $J = 8.00$ , 1H), 8.12 (br, 1H);  $^{13}C$  NMR (100 MHz,  $CDCl_3$ )  $\delta$  111.0, 114.0, 115.5, 115.7 (d,  $J = 7$  Hz), 116.0, 119.5, 120.7, 122.9, 128.6, 129.9, 130.0 (d,  $J = 8$  Hz), 131.5 (d,  $J = 8$  Hz), 133.2, 135.8, 160.4, 161.2 (d,  $J = 246$  Hz), 162.9 (d,  $J = 244$  Hz);  $^{19}F$  NMR (376 MHz,  $CDCl_3$ )  $\delta$  -116.2, -113.3; HRMS (EI) calcd. for  $C_{20}H_{13}F_2N$  [M]: 305.1013, found: 305.1008.

**2,3-Bis(4-bromophenyl)-1H-indole (3ae):**<sup>5</sup>

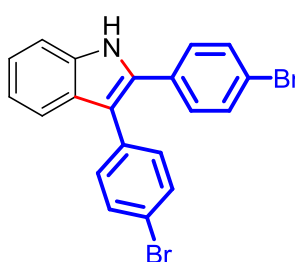

The title compound was prepared according to the general procedure as a white solid, 128.4 mg, 75% yield.  $^1H$  NMR (400 MHz,  $CDCl_3$ )  $\delta$  7.16 (t,  $J = 7.84$ , 1H), 7.24-7.29 (m, 5H), 7.40-7.51 (m, 5H), 7.61 (d,  $J = 7.96$  Hz, 1H), 8.18 (br, 1H);  $^{13}C$  NMR (100 MHz,  $CDCl_3$ )  $\delta$  111.1, 114.3, 119.5, 120.4, 120.9, 122.1, 123.3, 128.4, 129.7, 131.3, 131.7, 131.9, 132.1, 133.1, 133.7, 136.0. HRMS (EI) calcd. for  $C_{20}H_{13}Br_2N$  [M]: 424.9415, found: 424.9426.

**2-Phenyl-3-*p*-tolyl-1H-indole (3af) and**

**3-Phenyl-2-*p*-tolyl-1H-indole (3af')** (1.14:1, Determined by NMR):<sup>8</sup>

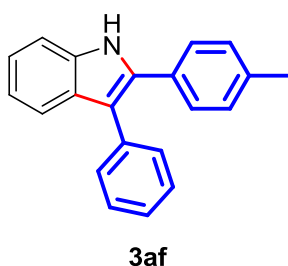

+

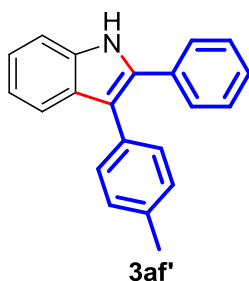

The title compound was prepared according to the general procedure as a white solid, 90.0 mg, 79% yield.  $^1H$  NMR (400 MHz,  $CDCl_3$ )  $\delta$  2.31 (s, 1.36H), 2.36 (s, 1.64H), 7.07-7.44 (m, 12H), 7.65 (d,  $J = 7.92$  Hz, 1H), 8.08 (br, 1H);  $^{13}C$  NMR (100 MHz,  $CDCl_3$ )  $\delta$  21.3, 110.8, 119.6, 119.8, 120.4, 122.5, 122.7, 126.2, 127.6, 128.0, 128.1, 128.5, 128.7, 128.8, 129.3, 129.4,

130.0, 130.2, 132.0, 132.8, 134.2, 135.8, 135.9, 137.6; HRMS (ESI) calcd. for C<sub>21</sub>H<sub>18</sub>N [M+H]: 284.1434, found: 284.1436.

**2-(4-Bromophenyl)-3-phenyl-1H-indole (3ag) and**

**3-(4-Bromophenyl)-2-phenyl-1H-indole (3ag') (1:1 Determined by NMR):<sup>7</sup>**

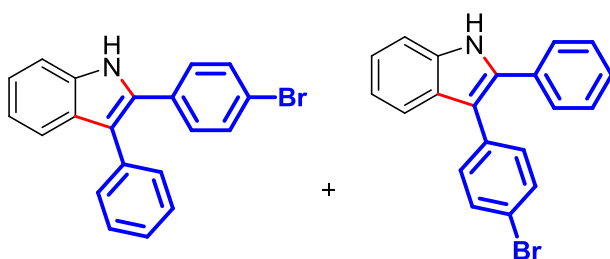

The title compound was prepared according to the general procedure as a white solid, 86.6 mg, 62% yield.

<sup>1</sup>H NMR (400 MHz, CDCl<sub>3</sub>) δ 7.13-7.18 (m, 1H), 7.23-7.50 (m, 11H), 7.63-7.67 (m, 1H), 8.17 (br, 0.48H), 8.24 (br, 0.45H); <sup>13</sup>C NMR (100 MHz, CDCl<sub>3</sub>) δ 111.0, 111.0, 113.8, 115.7, 119.4, 119.8, 120.2, 120.6, 120.7, 121.8, 122.9, 123.1, 126.5, 128.0, 128.2, 128.4, 128.7, 128.7, 128.9, 129.6, 130.1, 131.6, 131.7, 131.9, 132.4, 132.8, 134.1, 134.4, 134.7, 135.9, 136.0; HRMS (ESI) calcd. for C<sub>20</sub>H<sub>18</sub>N<sub>2</sub>Br [M+NH<sub>4</sub>]: 365.0648, found: 365.0634.

**2-(4-Bromophenyl)-3-phenyl-1H-indole (3ah):**

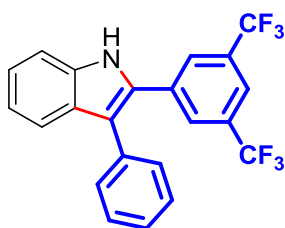

The title compound was prepared according to the general procedure as a white solid, 124.0 mg, 77% yield. <sup>1</sup>H NMR (400 MHz, CDCl<sub>3</sub>) δ 7.08-7.12 (m, 1H), 7.20-7.38 (m, 7H), 7.58 (d, *J* = 7.96 Hz, 1H), 7.66 (s, 1H), 7.72 (s, 2H), 8.21 (br, 1H); <sup>13</sup>C NMR (100 MHz, CDCl<sub>3</sub>) δ 111.2, 117.9, 120.3, 120.7 (heptet, *J* = 4 Hz), 121.1, 121.7 (q, *J* = 271 Hz), 124.0, 127.3, 127.7, 128.6, 129.0, 130.0, 130.5, 131.5 (q, *J* = 33 Hz), 133.7, 134.8, 136.4; <sup>19</sup>F NMR (376 MHz, CDCl<sub>3</sub>) δ -63.2; HRMS (EI) calcd. for C<sub>22</sub>H<sub>13</sub>F<sub>6</sub>N [M]: 405.0952, found: 405.0945.

**3-Methyl-2-phenyl-1H-indole (3ai):<sup>8</sup>**

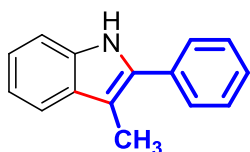

The title compound was prepared according to the general procedure as a white solid, 43.0 mg, 52% yield. <sup>1</sup>H NMR (400 MHz, DMSO-*d*<sub>6</sub>) δ 2.43 (s, 3H), 7.01-7.05 (m, 1H), 7.10-7.14 (m, 1H), 7.35-7.39 (m, 2H), 7.50-7.55 (m, 3H), 7.68-7.70 (m, 2H), 11.17 (br, 1H); <sup>13</sup>C

NMR (100 MHz, DMSO-*d*<sub>6</sub>) δ 9.8, 106.7, 111.0, 118.4, 118.5, 121.5, 126.9, 127.5, 128.7, 129.4, 133.1, 133.7, 135.9; HRMS (ESI) calcd. for C<sub>15</sub>H<sub>14</sub>N [M+H]: 208.1121, found: 208.1125.

**3-Benzyl-2-phenyl-1H-indole (3aj) and**

**2-benzyl-3-phenyl-1H-indole (3aj')** (12:1 Determined by NMR):<sup>8</sup>

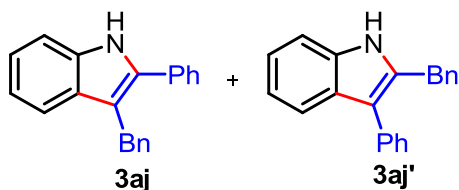

The title compound was prepared according to the general procedure as a white solid, 57.2 mg, 50% yield. <sup>1</sup>H NMR (400 MHz, DMSO-*d*<sub>6</sub>) δ 4.19 (s, 0.15H), 4.24 (s, 1.85H), 6.94-6.98 (m, 0.92H), 7.01-7.04 (m, 0.09H), 7.09-7.18 (m, 3.84H), 7.22-7.27 (m, 1.91H), 7.29-7.31 (m, 0.17H), 7.35-7.41 (m, 2.83H), 7.46-7.50 (m, 2.07H), 7.53-7.55 (m, 0.09H), 7.60-7.62 (m, 1.93H), 7.66-8.24 (m, 0.28H), 11.22 (br, 0.07H), 11.33 (br, 0.90); <sup>13</sup>C NMR (100 MHz, DMSO-*d*<sub>6</sub>) δ 29.9, 109.7, 111.2, 118.7, 118.8, 121.6, 125.7, 127.4, 127.5, 127.9, 128.3, 128.6, 128.7, 128.8, 132.7, 134.9, 136.1, 141.5; HRMS (ESI) calcd. for C<sub>21</sub>H<sub>18</sub>N [M+H]: 284.1428, found: 284.1434.

## 5. Mechanistic studies

### 5.1 Rh/O<sub>2</sub> catalytic system catalyzed aerobic C-H activation

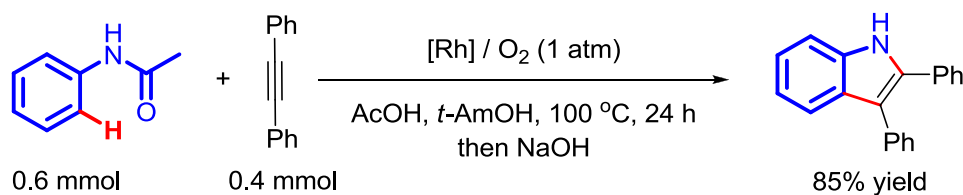

Following our general procedure: 1,2-diphenylethyne **2a** (71.3 mg, 0.4 mmol), Cp\*Rh(H<sub>2</sub>O)<sub>3</sub>(OTf)<sub>2</sub> (11.8 mg, 0.02 mmol, 5 mol%), acetanilide (81.1mg, 0.6 mmol), *t*-AmOH (2.0 mL) and AcOH (35  $\mu$ L, 0.6 mmol) were added to a 25 mL flame-dried Young-type tube. The mixture was degassed by the freeze-thaw method and supplied with 1 atm of oxygen, and then stirred at 100 °C for 24 hours. After cooling to room temperature, NaOH (48.0 mg, 1.2 mmol) and CH<sub>3</sub>OH (2.0 mL) were added into the reaction mixture, and then stirred at room temperature for another one hour. After evaporation of the solvents under reduced pressure, the residue was directly loaded onto a silica gel column (petroleum ether/ethyl acetate = 100/1) to afford the desired product **3aa** in 85% yield (91.2 mg).

### 5.2 Substrate Competition Experiments

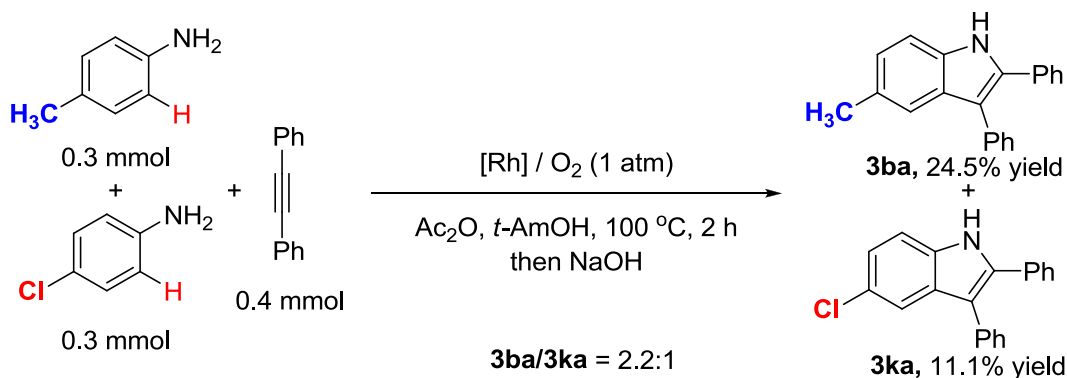

Following our general procedure: 1,2-diphenylethyne **2a** (71.3 mg, 0.4 mmol), Cp\*Rh(H<sub>2</sub>O)<sub>3</sub>(OTf)<sub>2</sub> (11.8 mg, 0.02 mmol, 5 mol%), *p*-toluidine **1b**, (32.2mg, 0.3 mmol), 4-chloroaniline **1k** (38.3 mg, 0.3 mmol), *t*-AmOH (2.0 mL) and Ac<sub>2</sub>O (57.0  $\mu$ L, 0.6 mmol) were added to a 25 mL flame-dried Young-type tube. The mixture was degassed by the freeze-thaw method and supplied with 1 atm of oxygen, and then stirred at 100 °C for two hours. After cooling to room temperature, NaOH (48.0 mg, 1.2 mmol) and CH<sub>3</sub>OH (2.0 mL) were added into the reaction mixture, and then stirred

at room temperature for another one hour. After evaporation of the solvents under reduced pressure, the residue was directly loaded onto a silica gel column (petroleum ether/ethyl acetate = 100/1) to afford the desired products **3ba** (24.5% yield) and **3ka** (11.1% yield), respectively.

ZGY-130916-2-HNMR

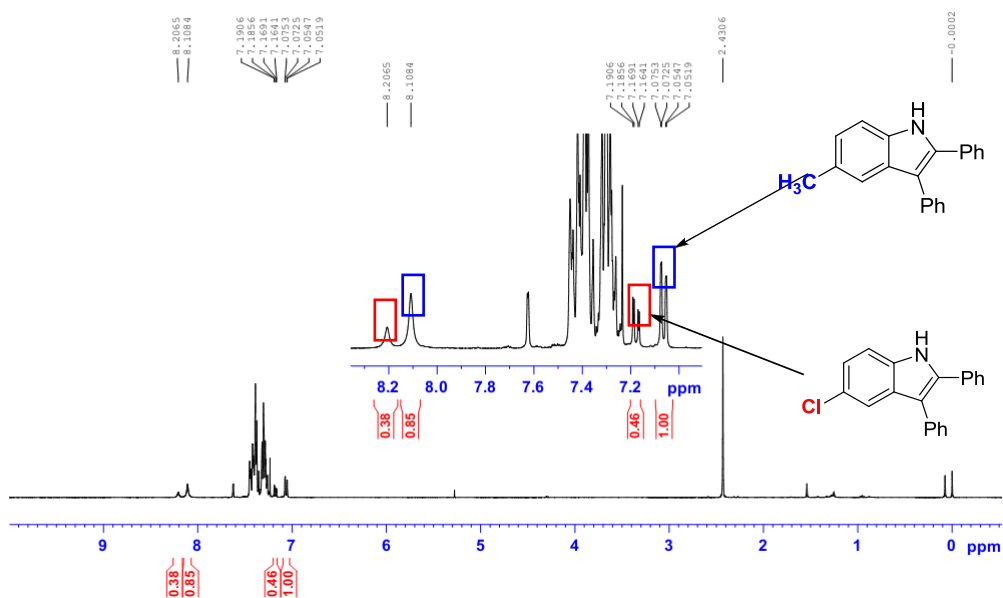

### 5.3 Synthesis of aniline (**D<sub>5</sub>-1a'**):<sup>9</sup>

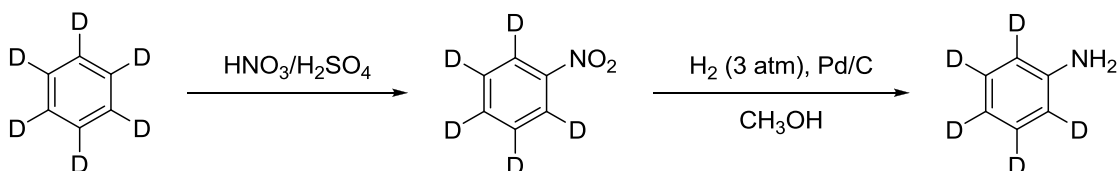

#### Synthesis of **D<sub>5</sub>**-nitrobenzene:

Concentrated nitric acid (12.0 mL) and concentrated sulfuric acid (13.6 mL) were mixed together in a 250 mL round-bottom flask held in 30-50 °C. Benzene-*d*<sub>6</sub> (10.0 mL, 112 mmol) was added drop-wise at 80 °C and the mixture was allowed to stir at 60 °C for an additional 45 minutes. Then the reaction mixture was poured into ice-water (100 mL) and extracted with DCM (3×50 mL). The combined organic layer was washed with ice water (2×50 mL), sat. aq. NaHCO<sub>3</sub> solution (2×50 mL), brine (2×40 mL), and dried with anhydrous Na<sub>2</sub>SO<sub>4</sub> for 24 hours. After distilling, faint yellow oil of **D<sub>5</sub>**-nitrobenzene was obtained in 81 % yield, (11.7 g).

#### Synthesis of **D<sub>5</sub>**-aniline (**D<sub>5</sub>-1a'**):

**D<sub>5</sub>**-nitrobenzene (2.55 g), Pd/C (200 mg), MeOH (5 mL) were added to a teflon tube which was placed in an autoclave. Then the autoclave was purged and charged with H<sub>2</sub>

at 3 atm. The reaction mixture was stirred at room temperature for 16 hours, and then H<sub>2</sub> was carefully released. After evaporation of the solvents under reduced pressure, the residue was directly loaded onto a silica gel column (petroleum ether/ethyl acetate = 100/1) to afford the colorless oil desired product D<sub>5</sub>-aniline in 92 % yield (1.8 g).

#### 5.4 Experimental detail for determination of the intramolecular KIE

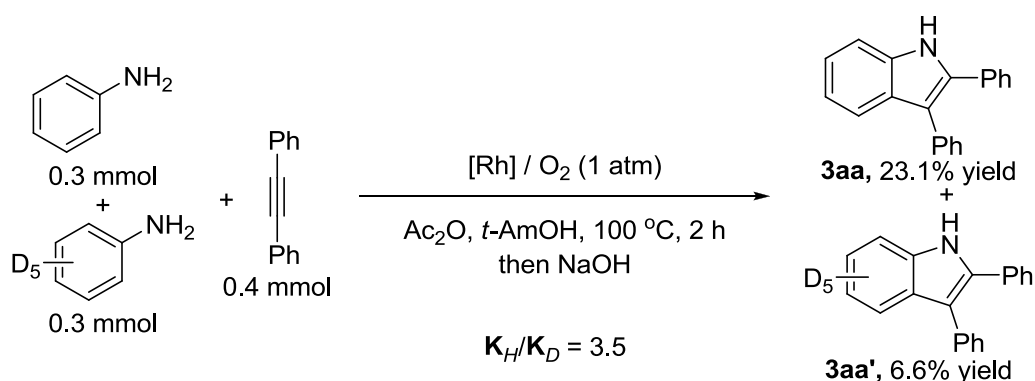

Following our general procedure: 1,2-diphenylethyne (71.3 mg, 0.4 mmol), Cp\*Rh(H<sub>2</sub>O)<sub>3</sub>(OTf)<sub>2</sub> (11.8 mg, 0.02 mmol, 5 mol%), D<sub>5</sub>-aniline (29.4 mg, 0.3 mmol), aniline (27.5 mg, 0.3 mmol), *t*-AmOH (2.0 mL) and Ac<sub>2</sub>O (57.0 μL, 0.6 mmol) were added to a 25 mL flame-dried Young-type tube. The mixture was degassed by the freeze-thaw method and supplied with 1 atm of O<sub>2</sub>, and then stirred at 100 °C for two hours. After cooling to room temperature, NaOH (48.0 mg, 1.2 mmol) and CH<sub>3</sub>OH (2.0 mL) were added into the reaction mixture, and then stirred at room temperature for another one hour. After evaporation of the solvents under reduced pressure, the residue was directly loaded onto a silica gel column (petroleum ether/ethyl acetate = 100/1) to afford the desired products **3aa** (23.1% yield) and **3aa'** (6.6 % yield), respectively.

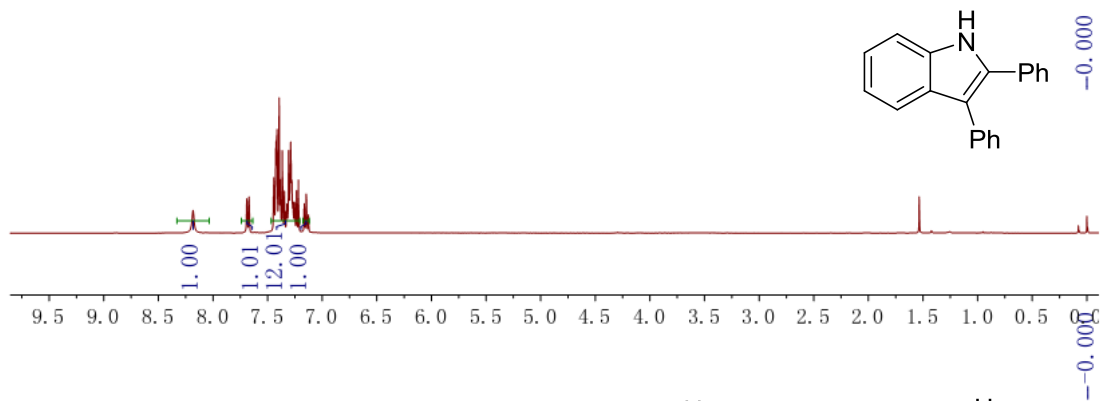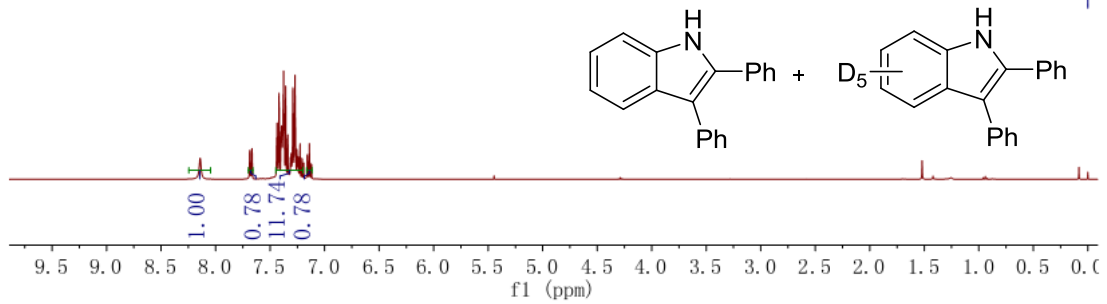



## 6. References

- 1 P. Chuentragool, K. Vongnam, P. Rashatasakhon, M. Sukwattanasinitt and S. Wacharasindhu, *Tetrahedron.*, 2011, **67**, 8177.
- 2 M. S. Eisen, A. Haskel, H. Chen, M. M. Olmstead, D. P. Smith, M. F. Maestre and R. H. Fish, *Organometallics.*, 1995, **14**, 2806.
- 3 M. Shen, G. Li, B. Z. Lu, A. Hossain, F. Roschangar, V. Farina and C. H. Senanayake, *Org. Lett.*, 2004, **6**, 4129.
- 4 C. Wang, H. Sun, Y. Fang and Y. Huang, *Angew. Chem. Int. Ed.*, 2013, **52**, 5795
- 5 X. Chen, X. Li, N. Wang, J. Jin, P. Lu and Y. Wang, *Eur. J. Org. Chem.*, 2012, 4380.
- 6 J.-D. Charrier, C. Landreau, D. Deniaud, F. Reliquet, A. Reliquet and J. C. Meslin, *Tetrahedron*, 2001, **57**, 4195.
- 7 B. Z. Lu, W. Zhao, H.-X. Wei, M. Dufour, V. Farina and C. H. Senanayake, *Org. Lett.*, 2006, **8**, 3271.
- 8 X. Fan and Y. Zhang, *Tetrahedron* **2003**, **59**, 1917.
- 9 D. R. Stuart, M. Bertrand-Laperle, K. M. N. Burgess and K. Fagnou, *J. Am. Chem. Soc.*, 2008, **130**, 16474.

## 7. Copies for $^1\text{H}$ NMR and $^{13}\text{C}$ NMR of the indole products

311-9-ZhangCY-HNMR I

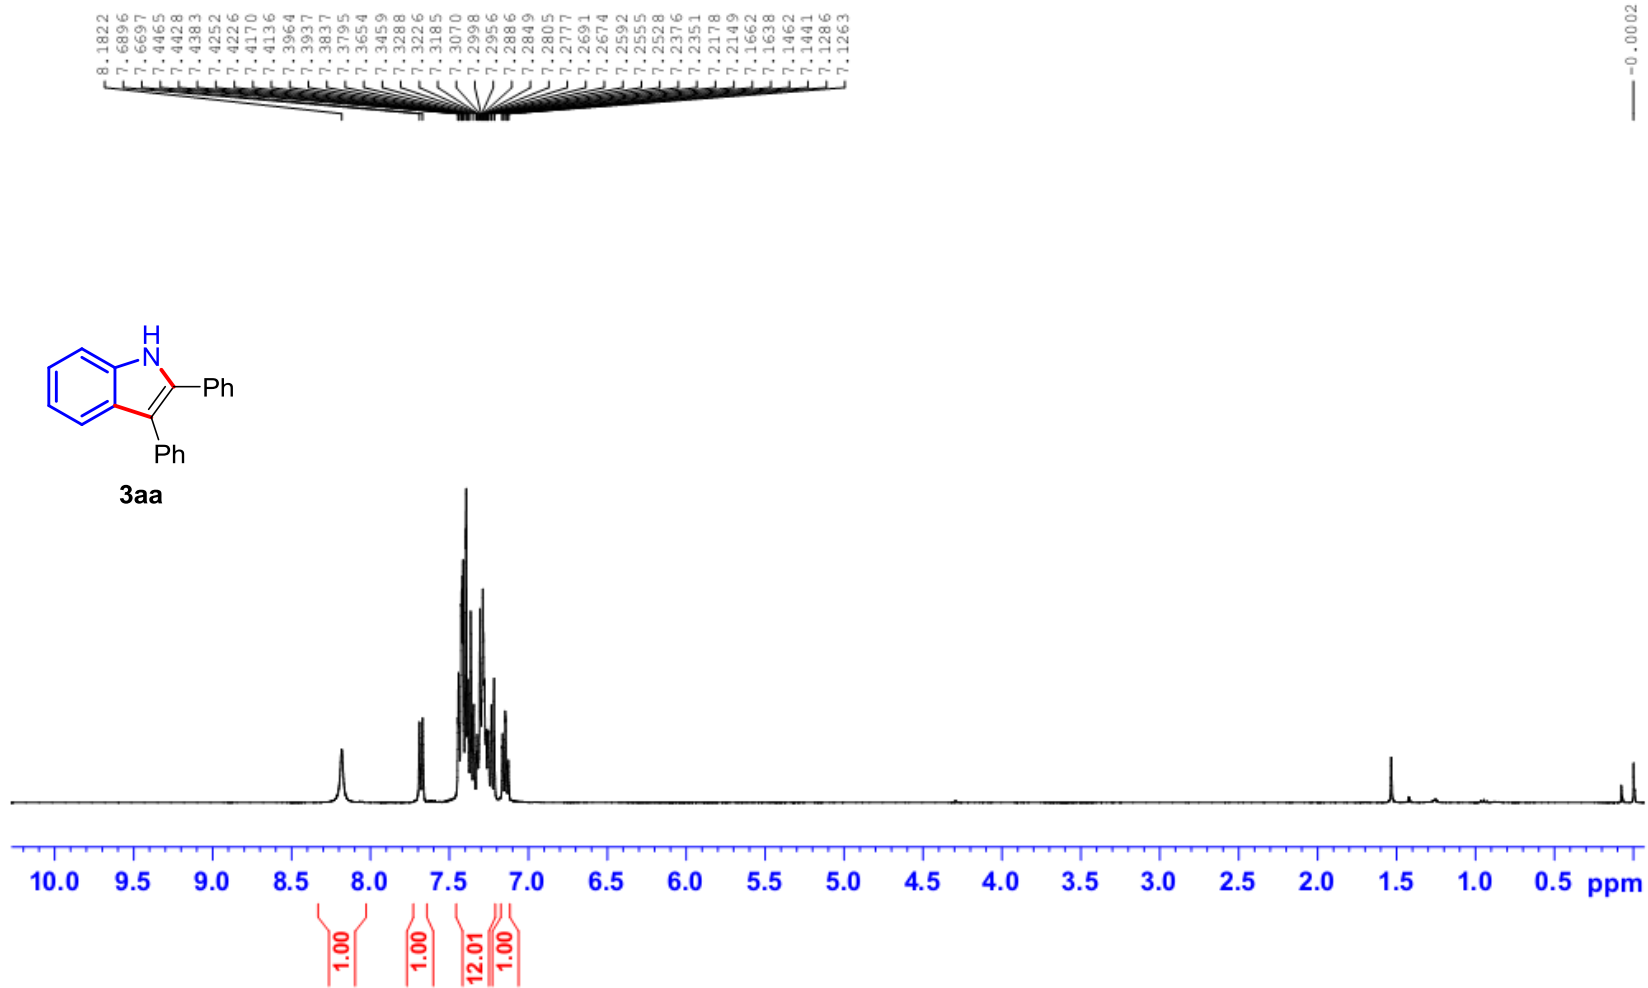

130911-9-ZhangCY-CNMR (18)

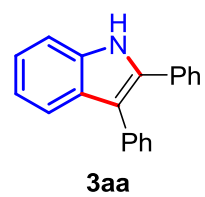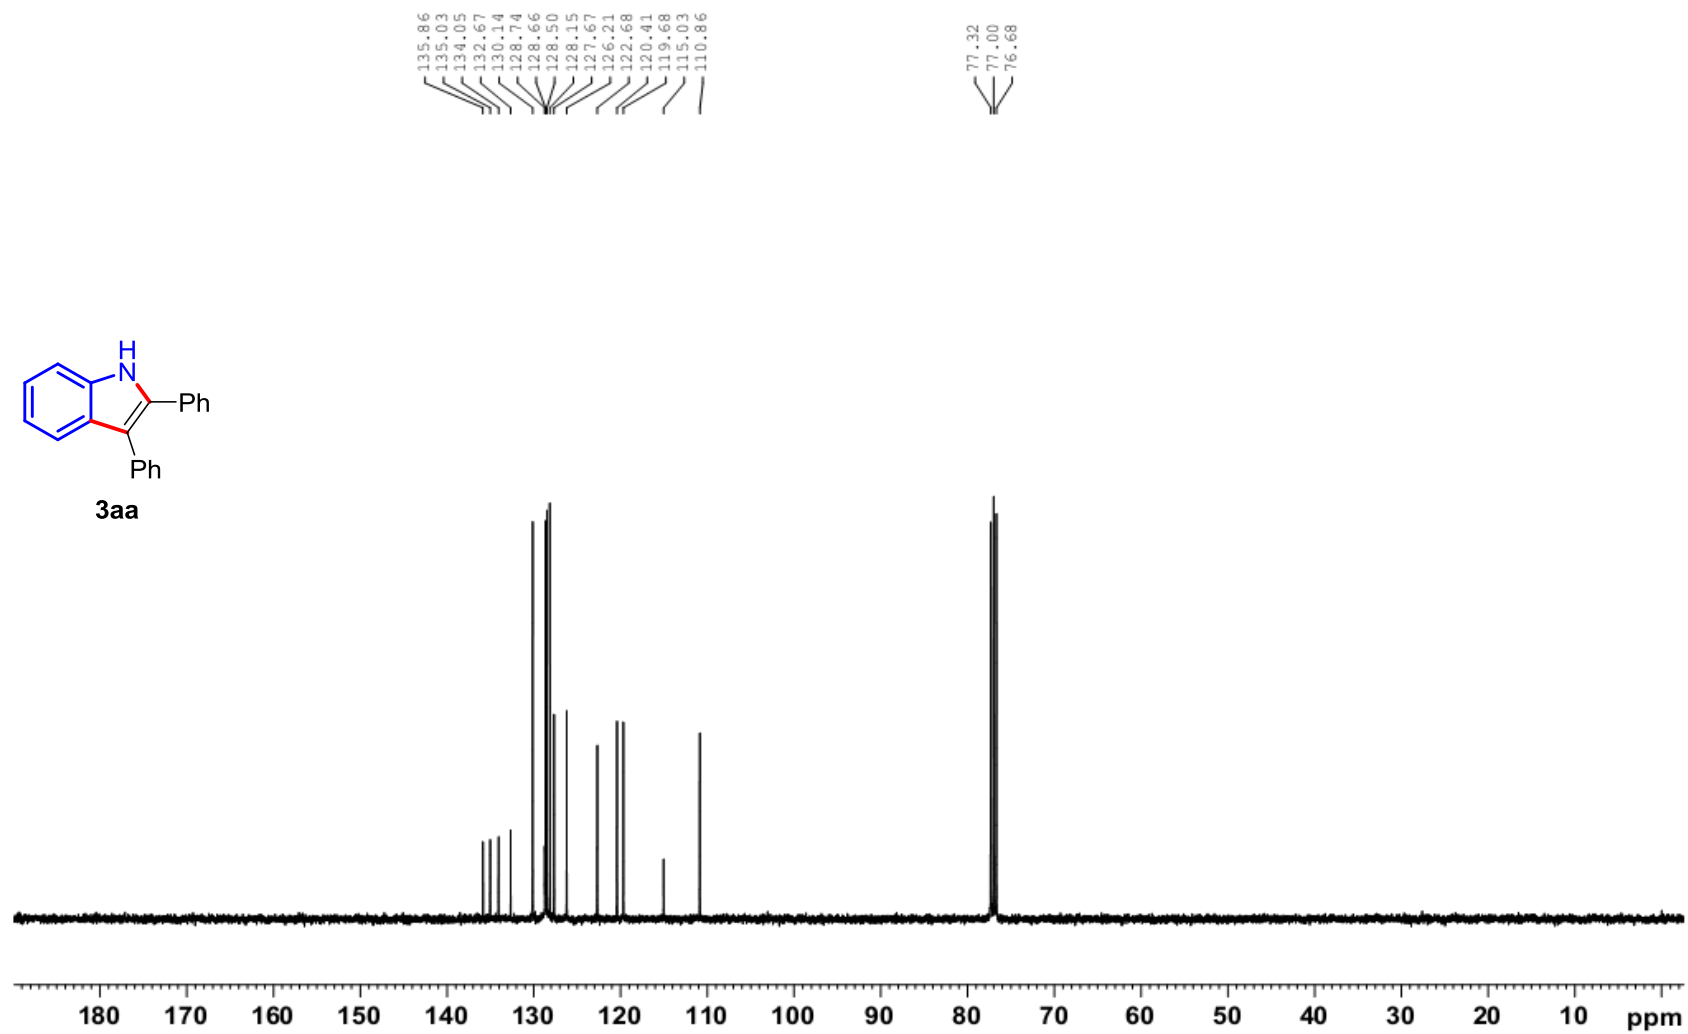

ZGY-130826-3-HNMR

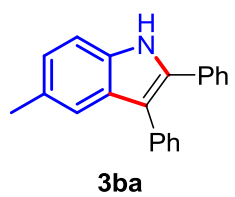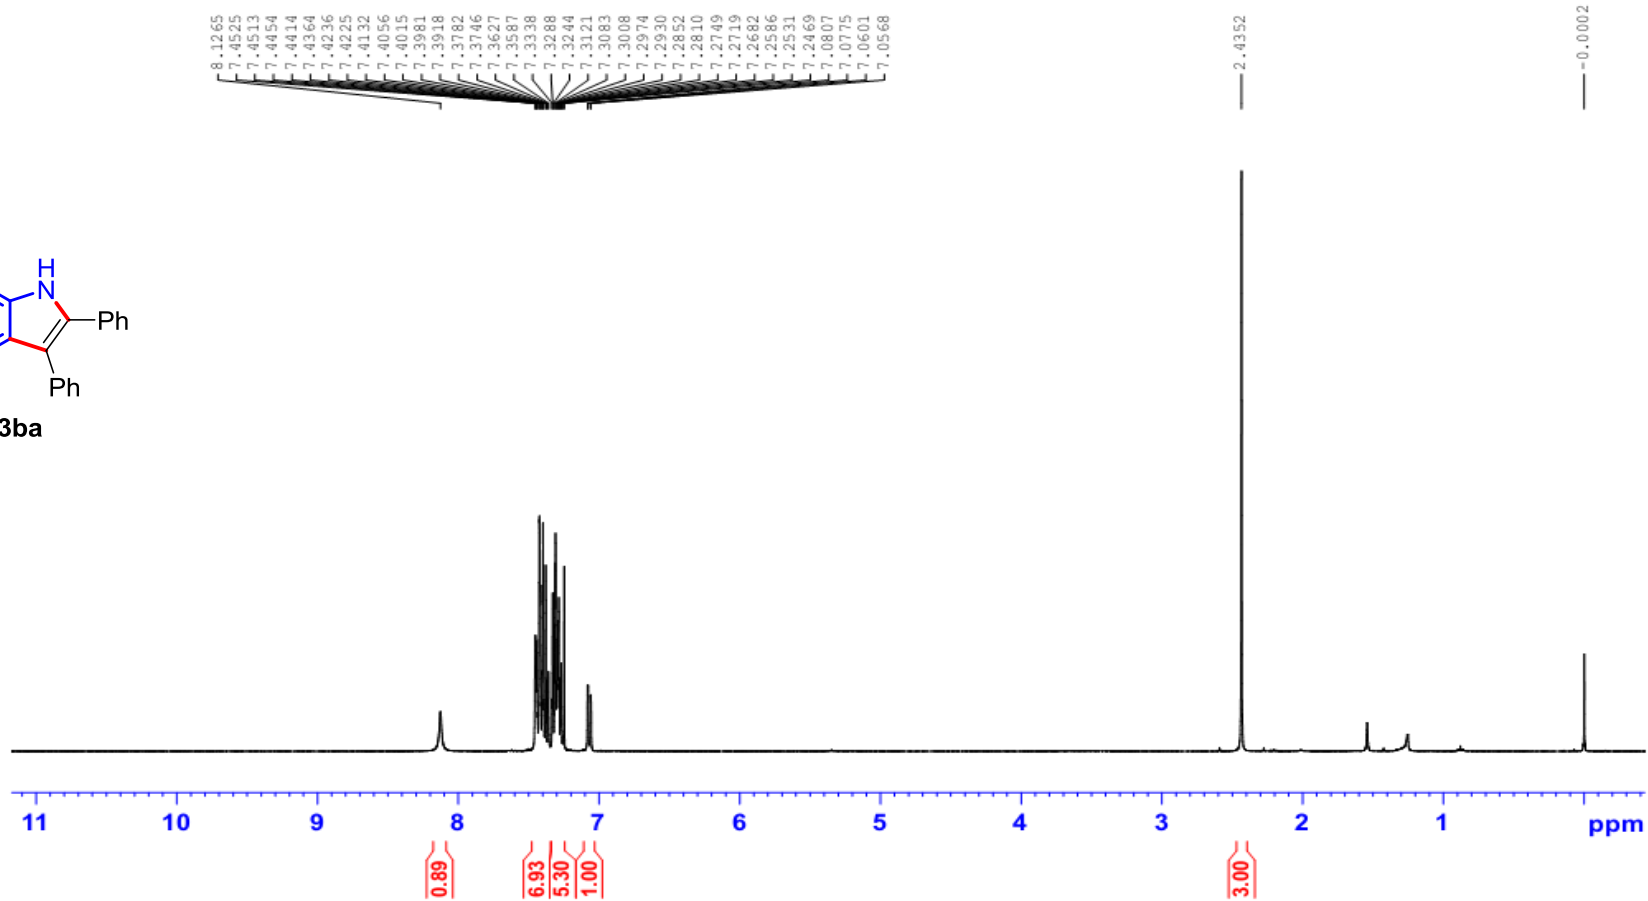

ZGY-130826-3-CNMR

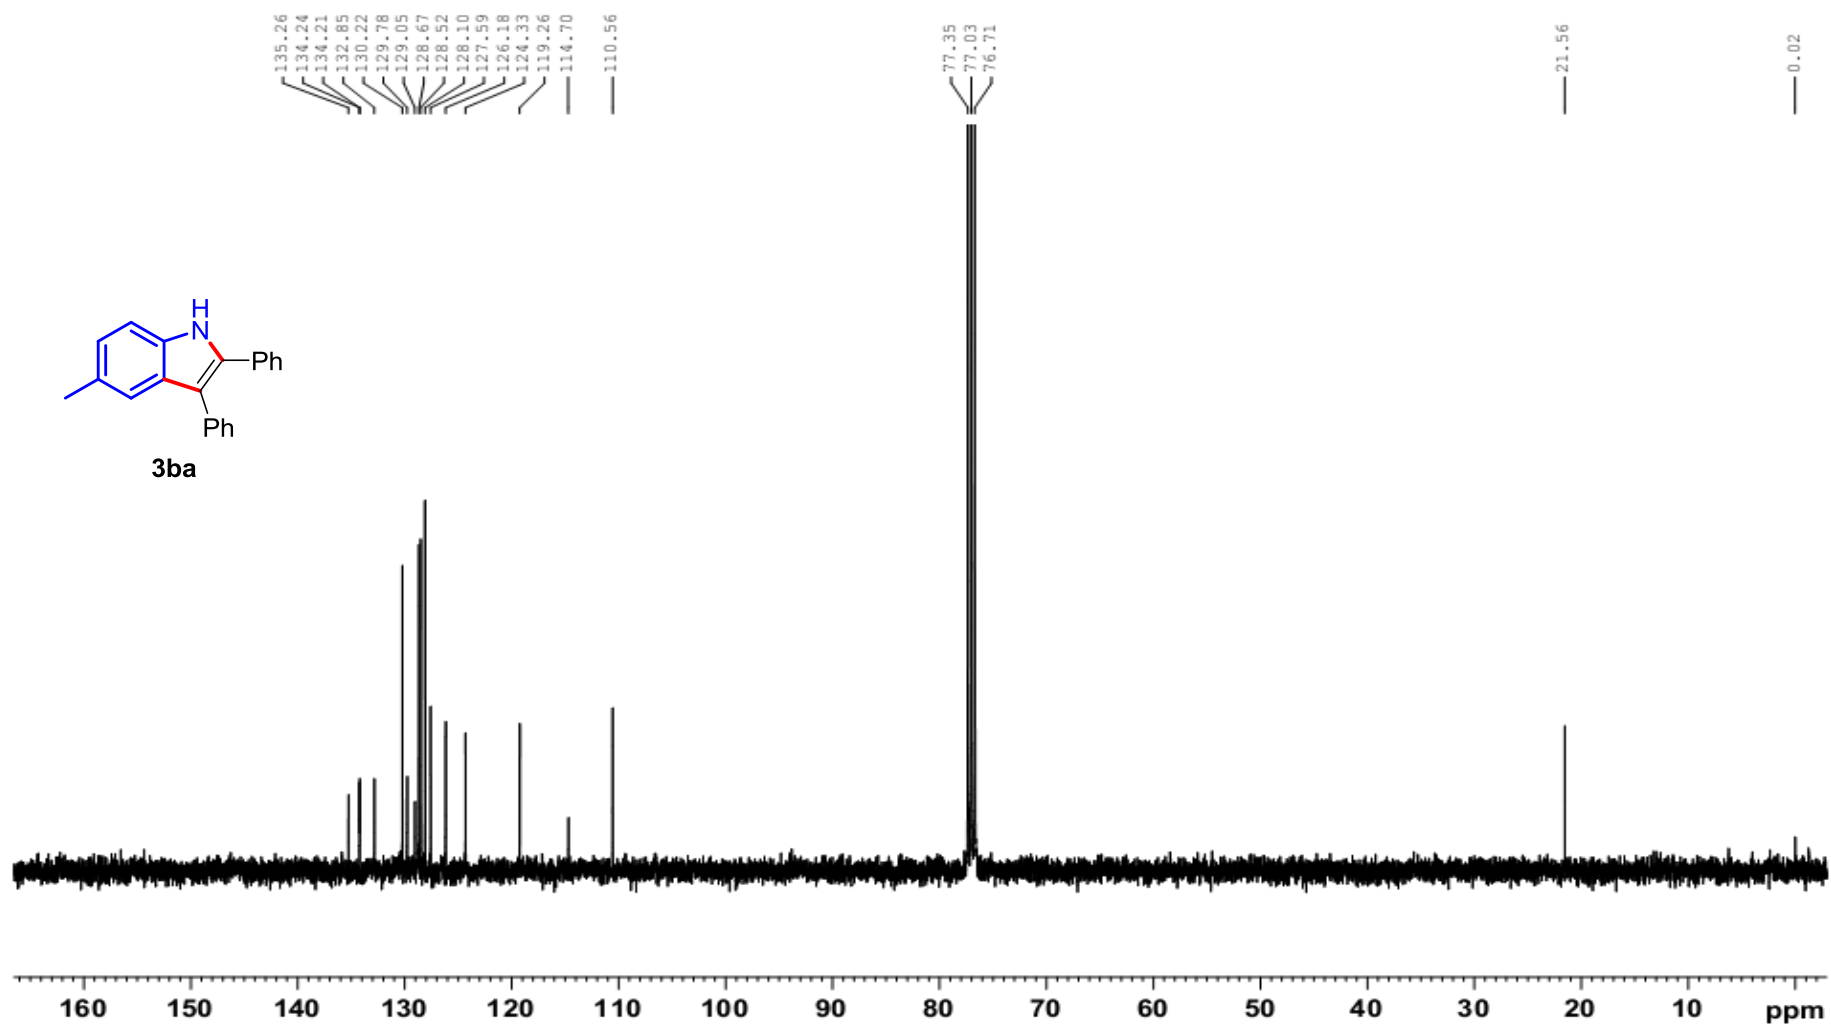

311-6-ZhangCY-HNMR

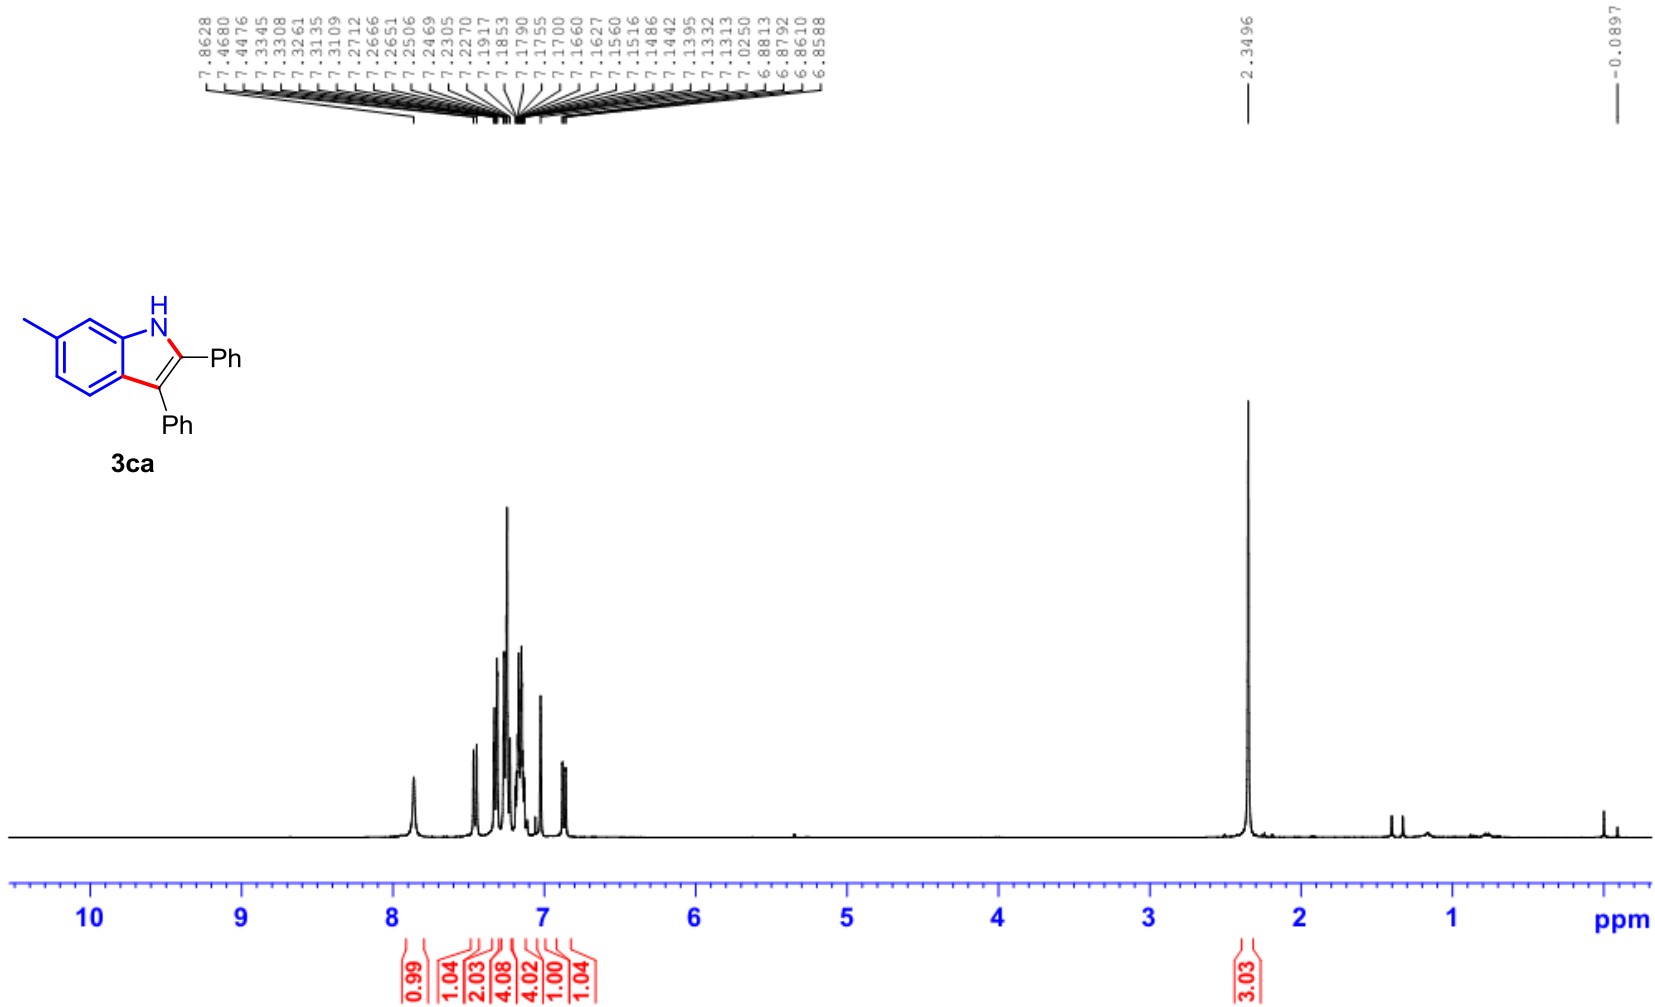

130911-6-ZhangCY-CNMR (12)

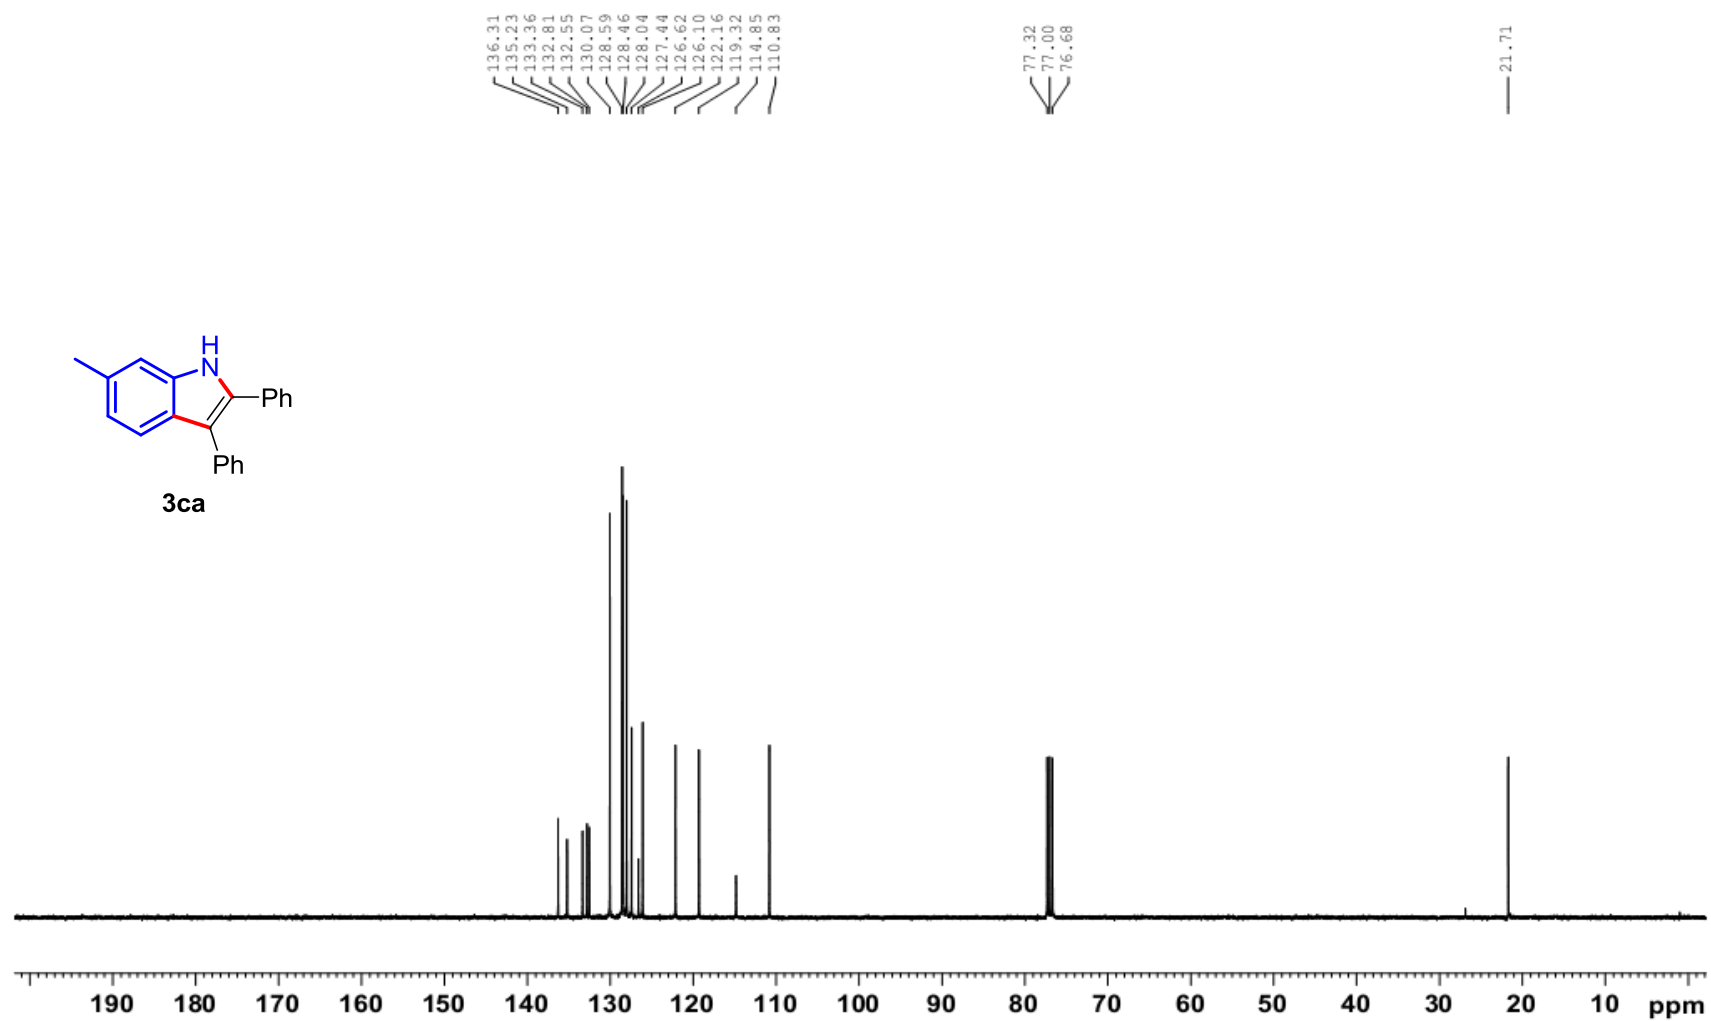

ZGY-131104-1-HNMR

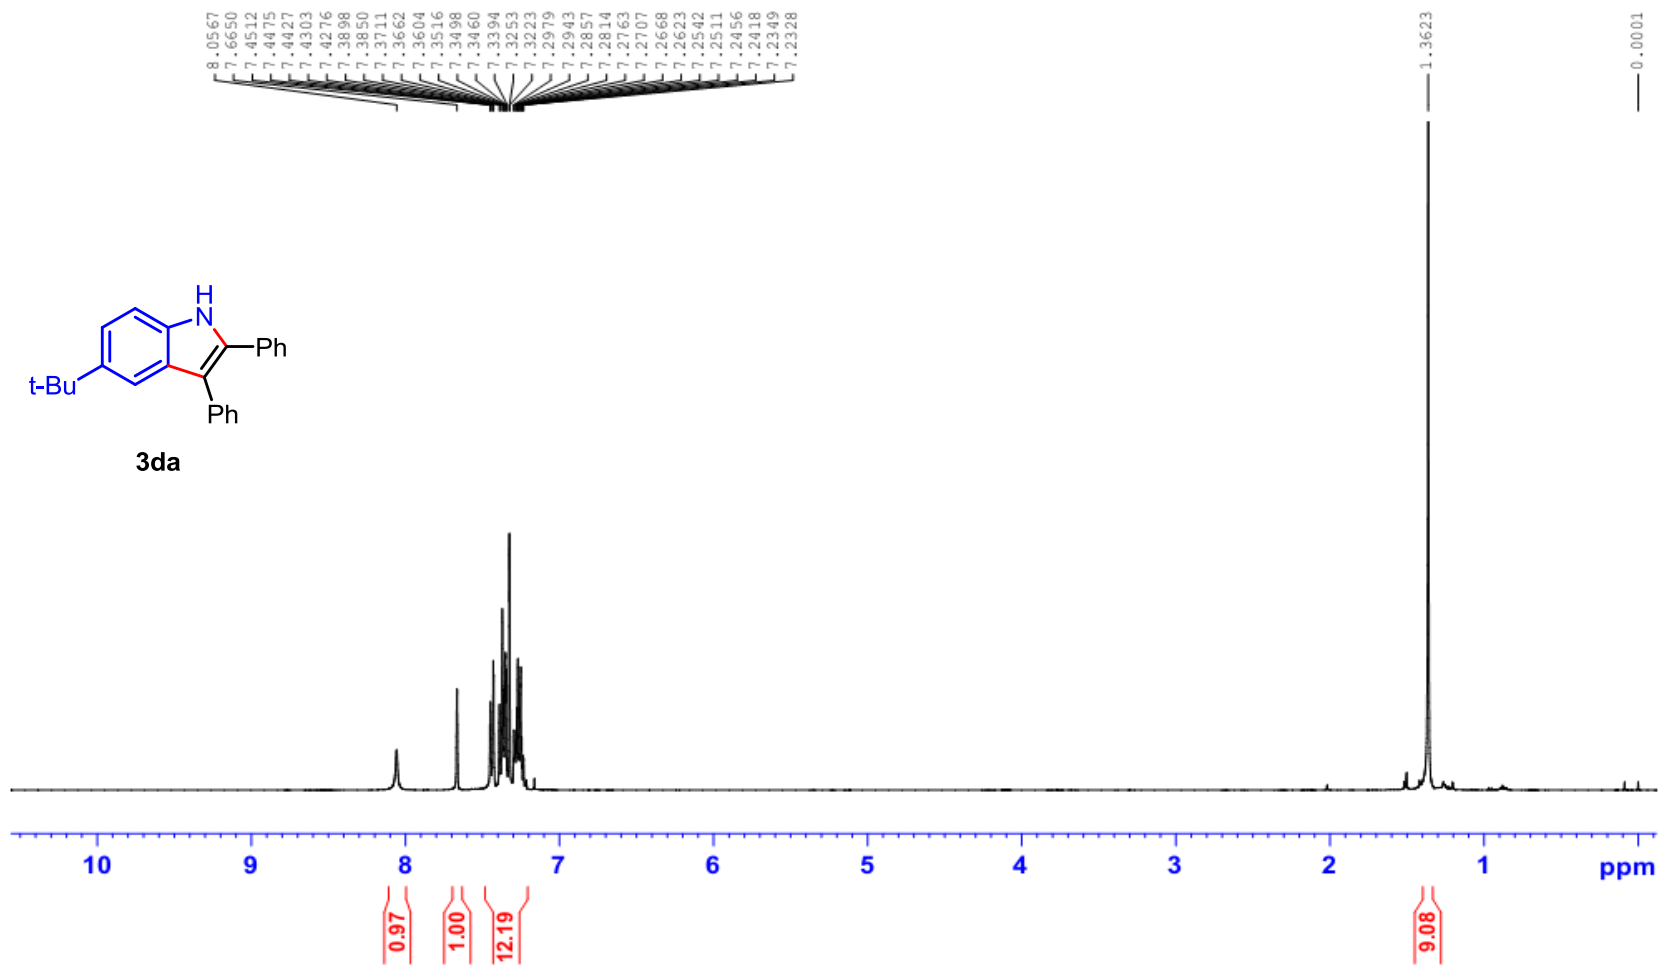



ZGY-131104-1-CNMR

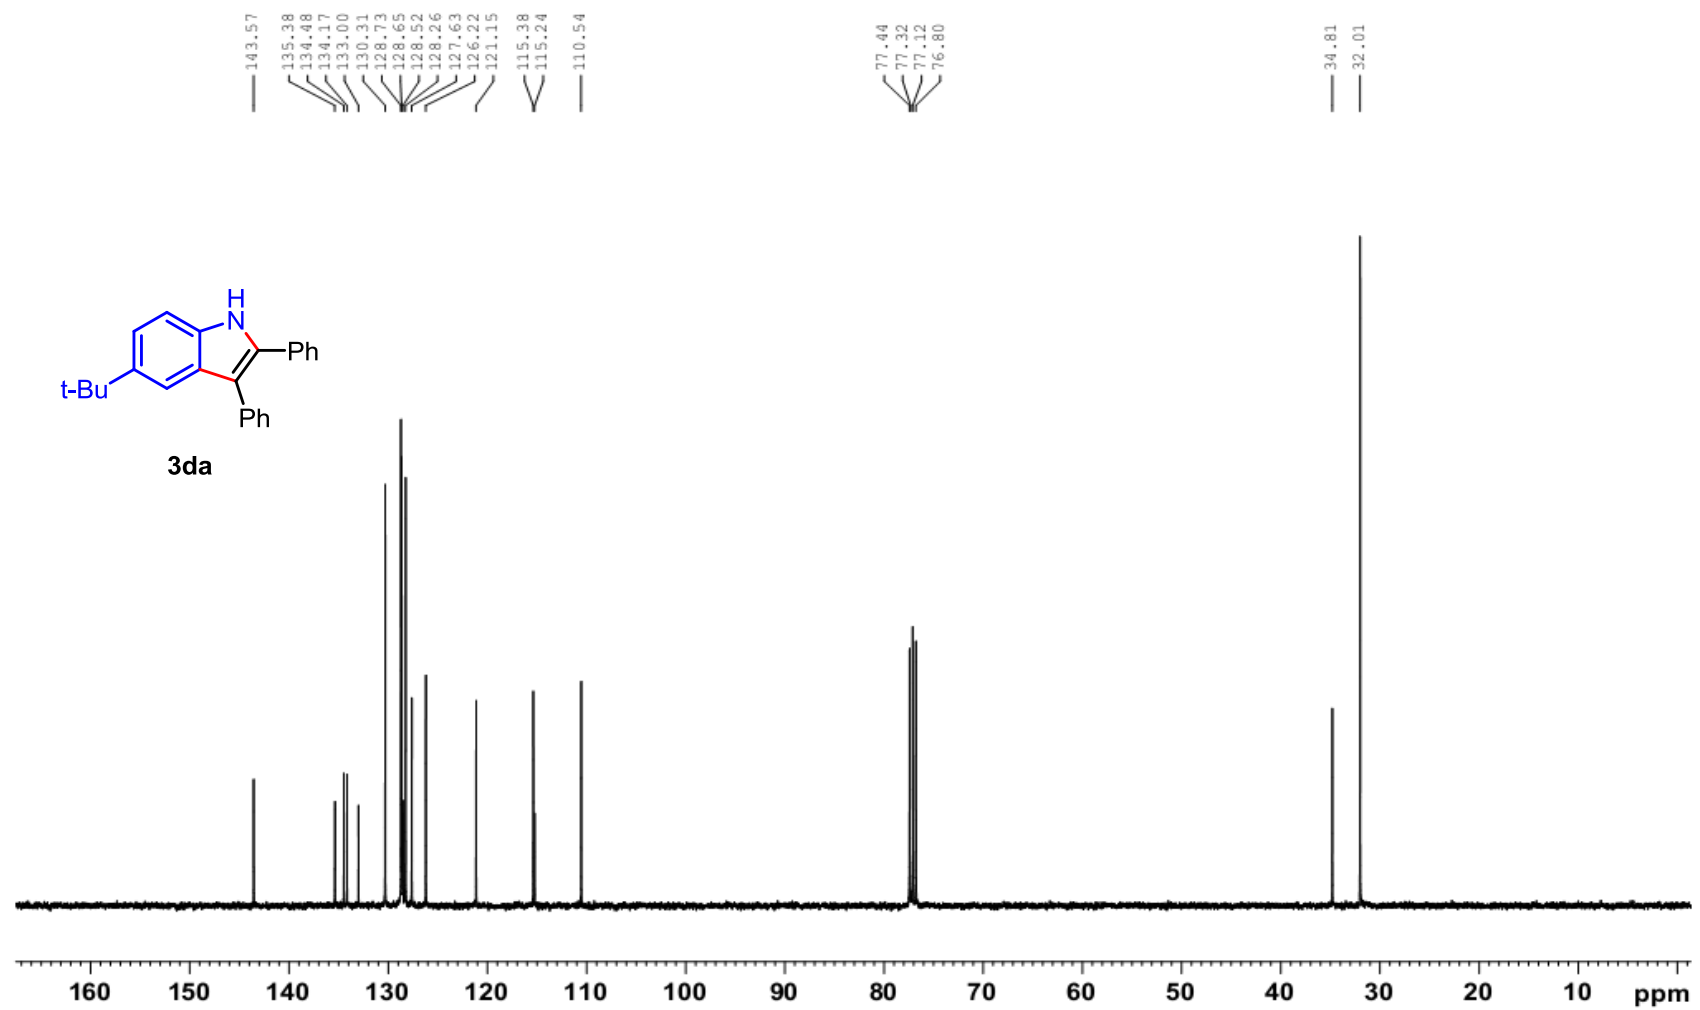

ZGY-140221-2-HNMR

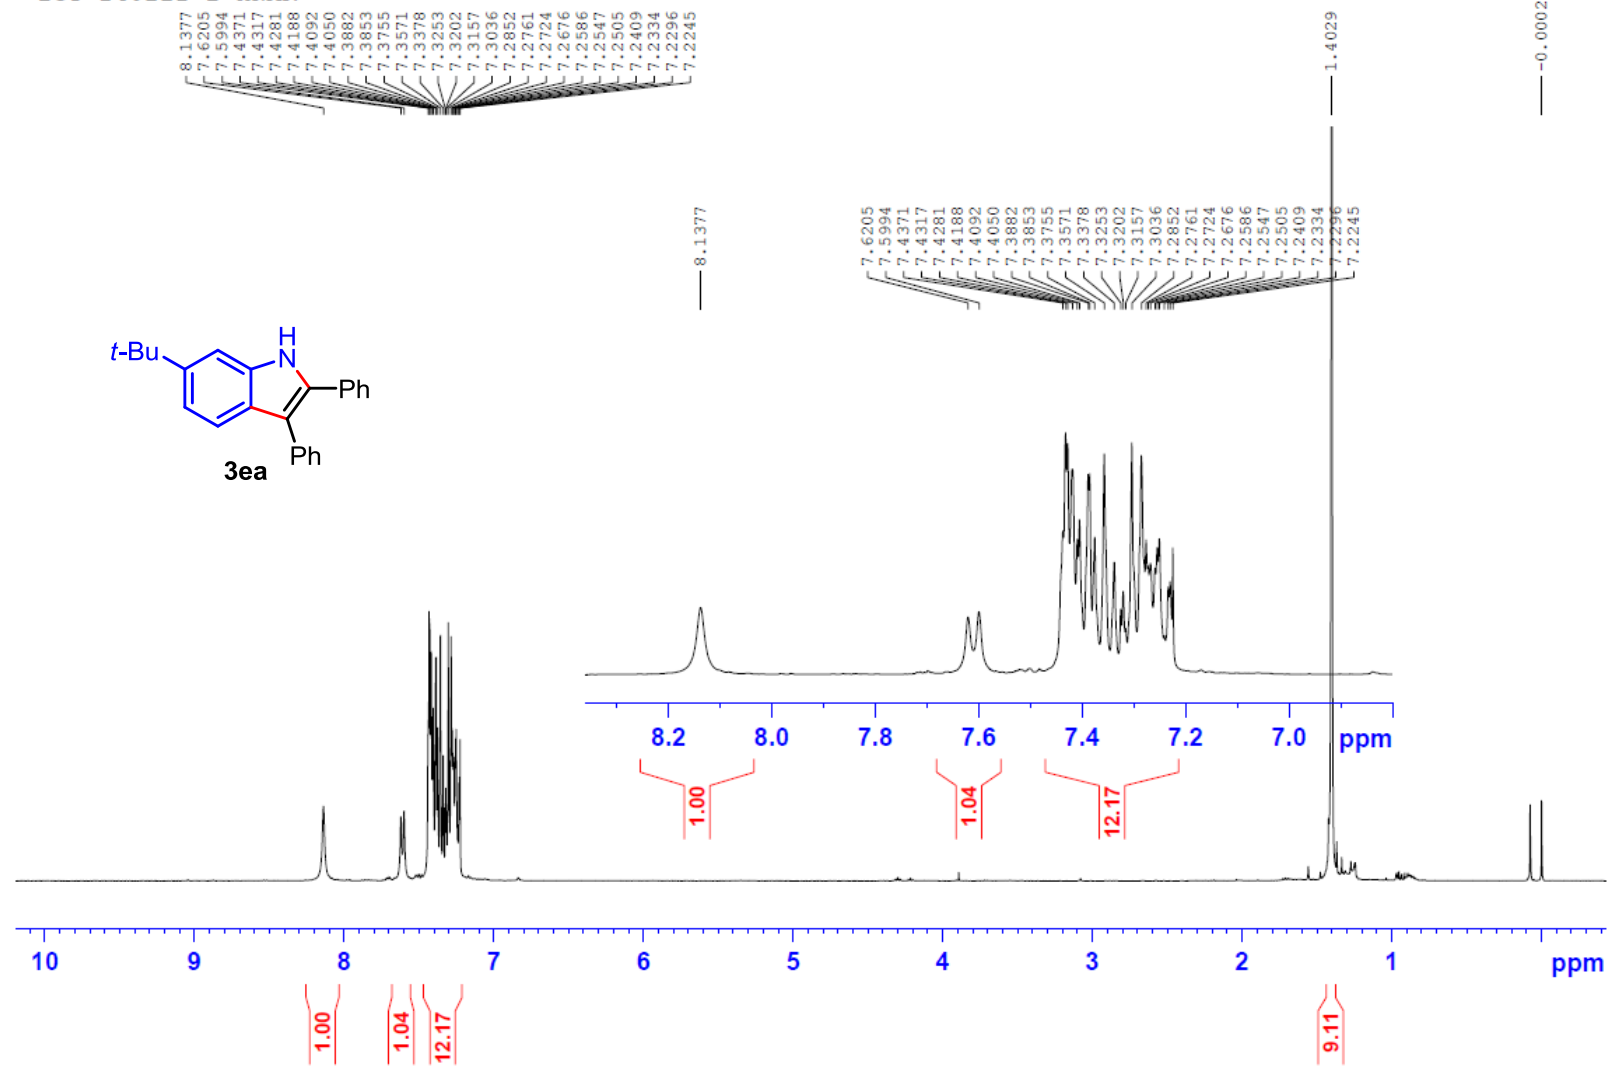

ZGY-140221-2-CNMR

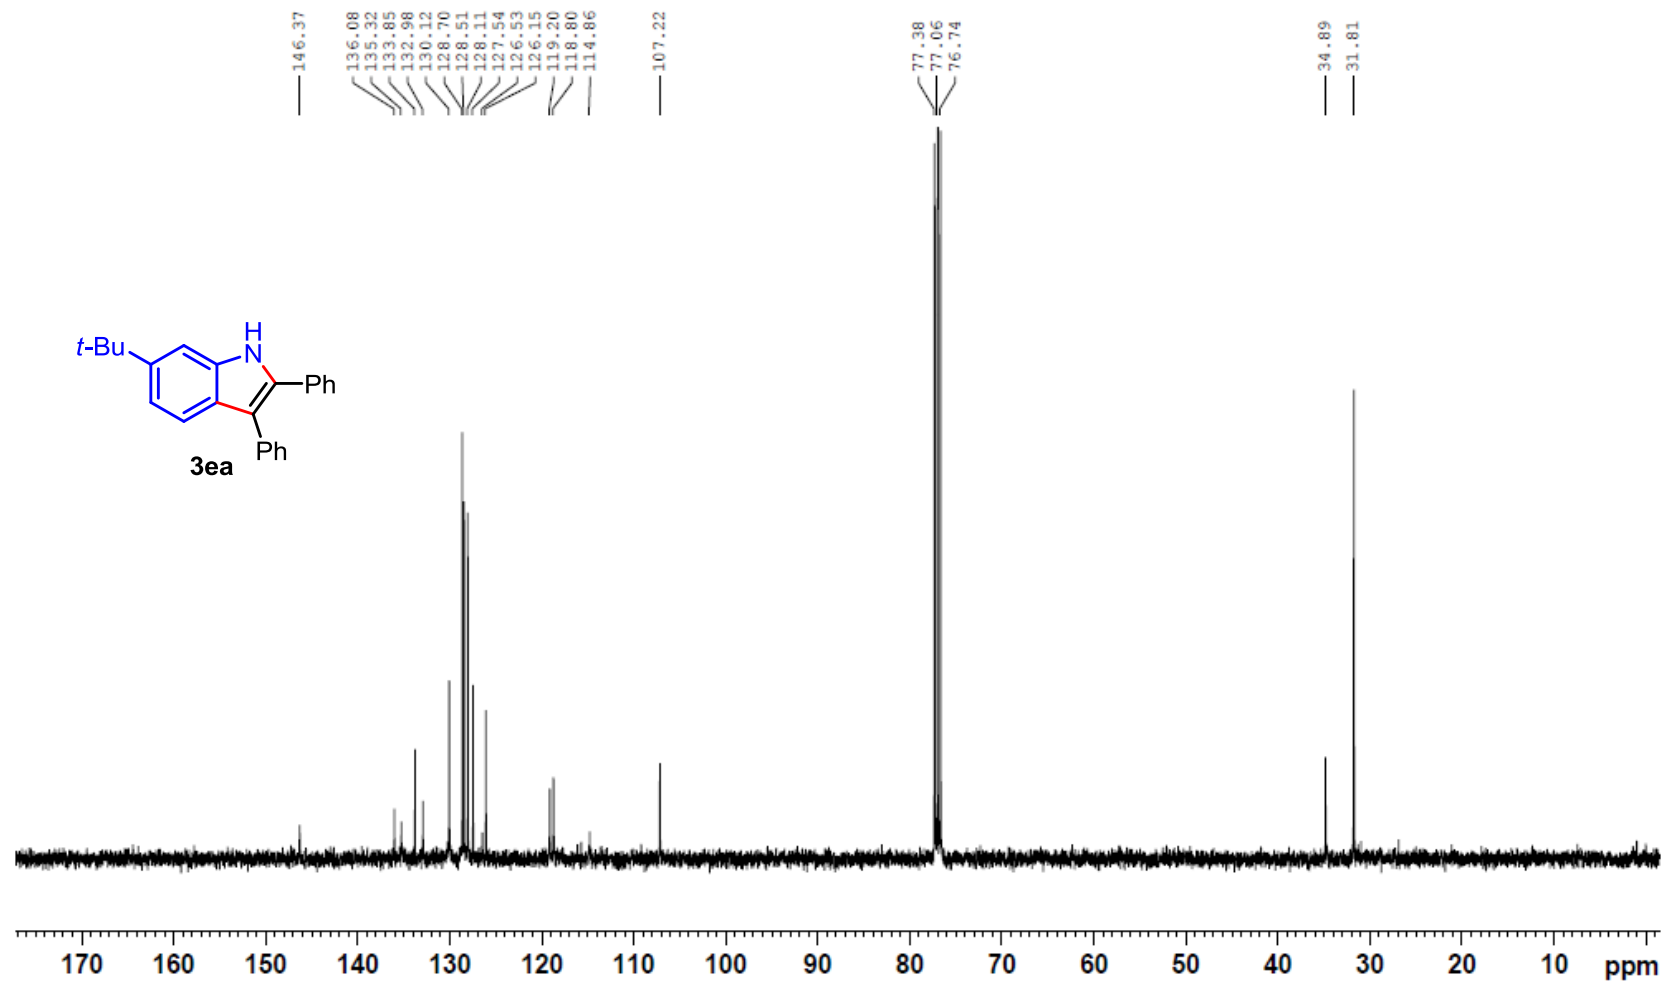

ZGY-130826-4-HNMR

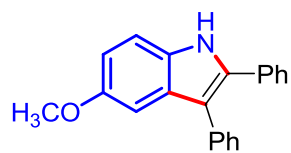

3fa

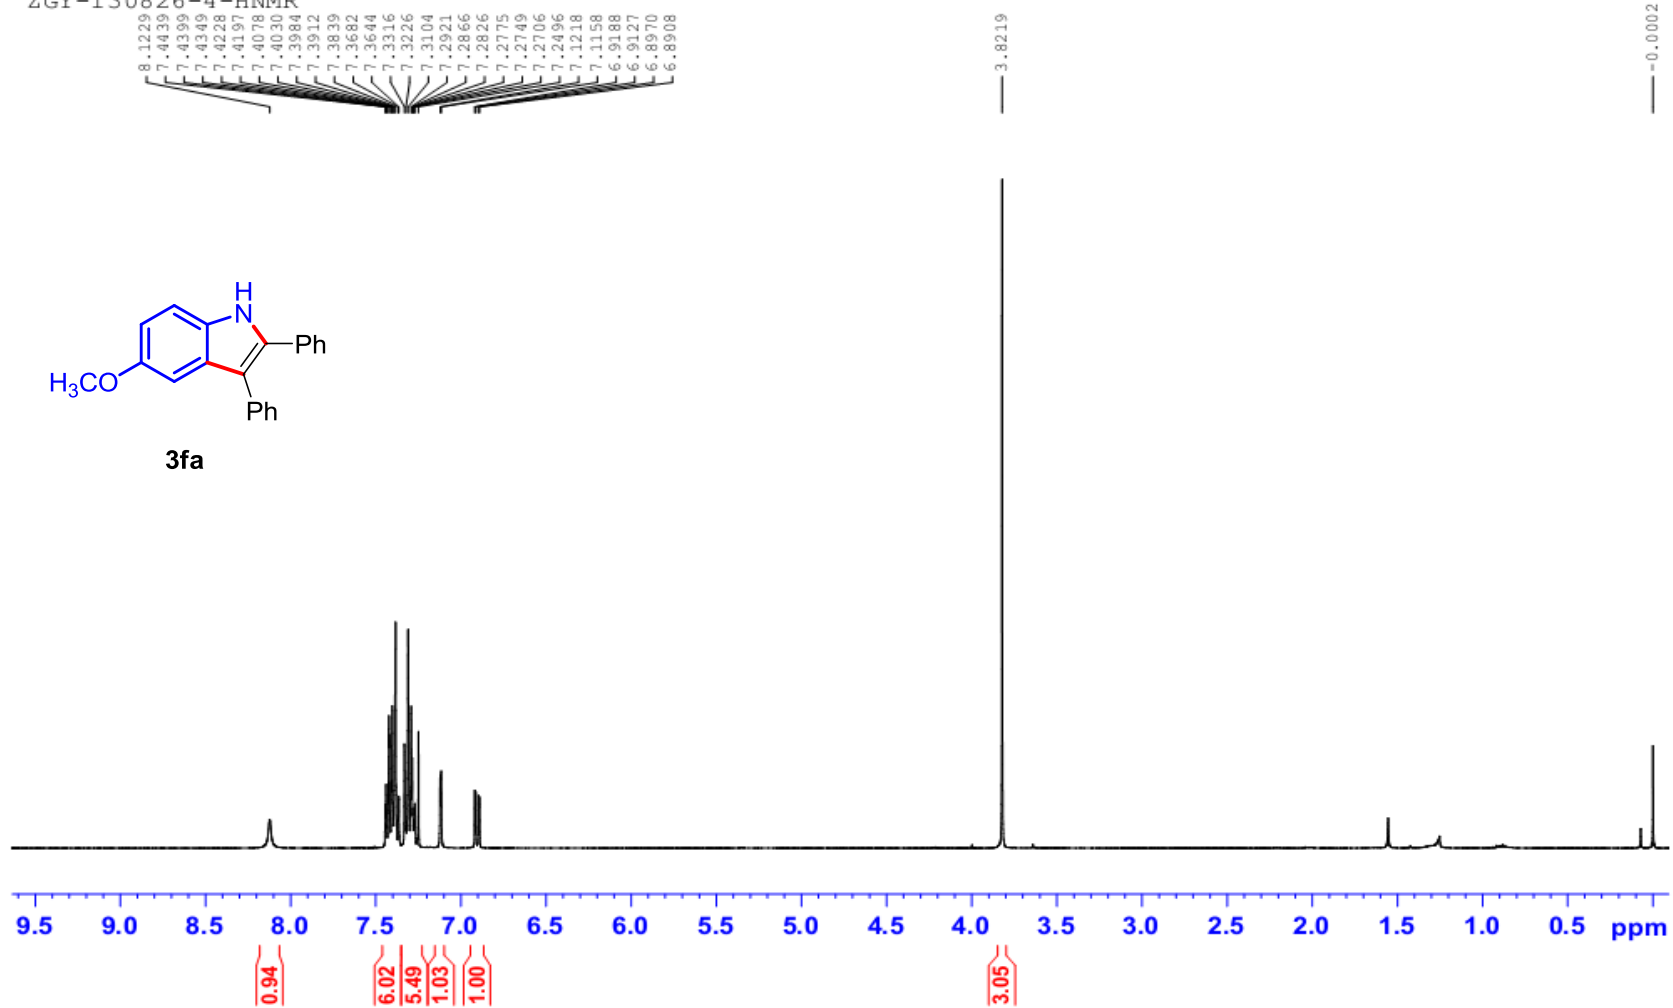

ZGY-130826-4-CNMR

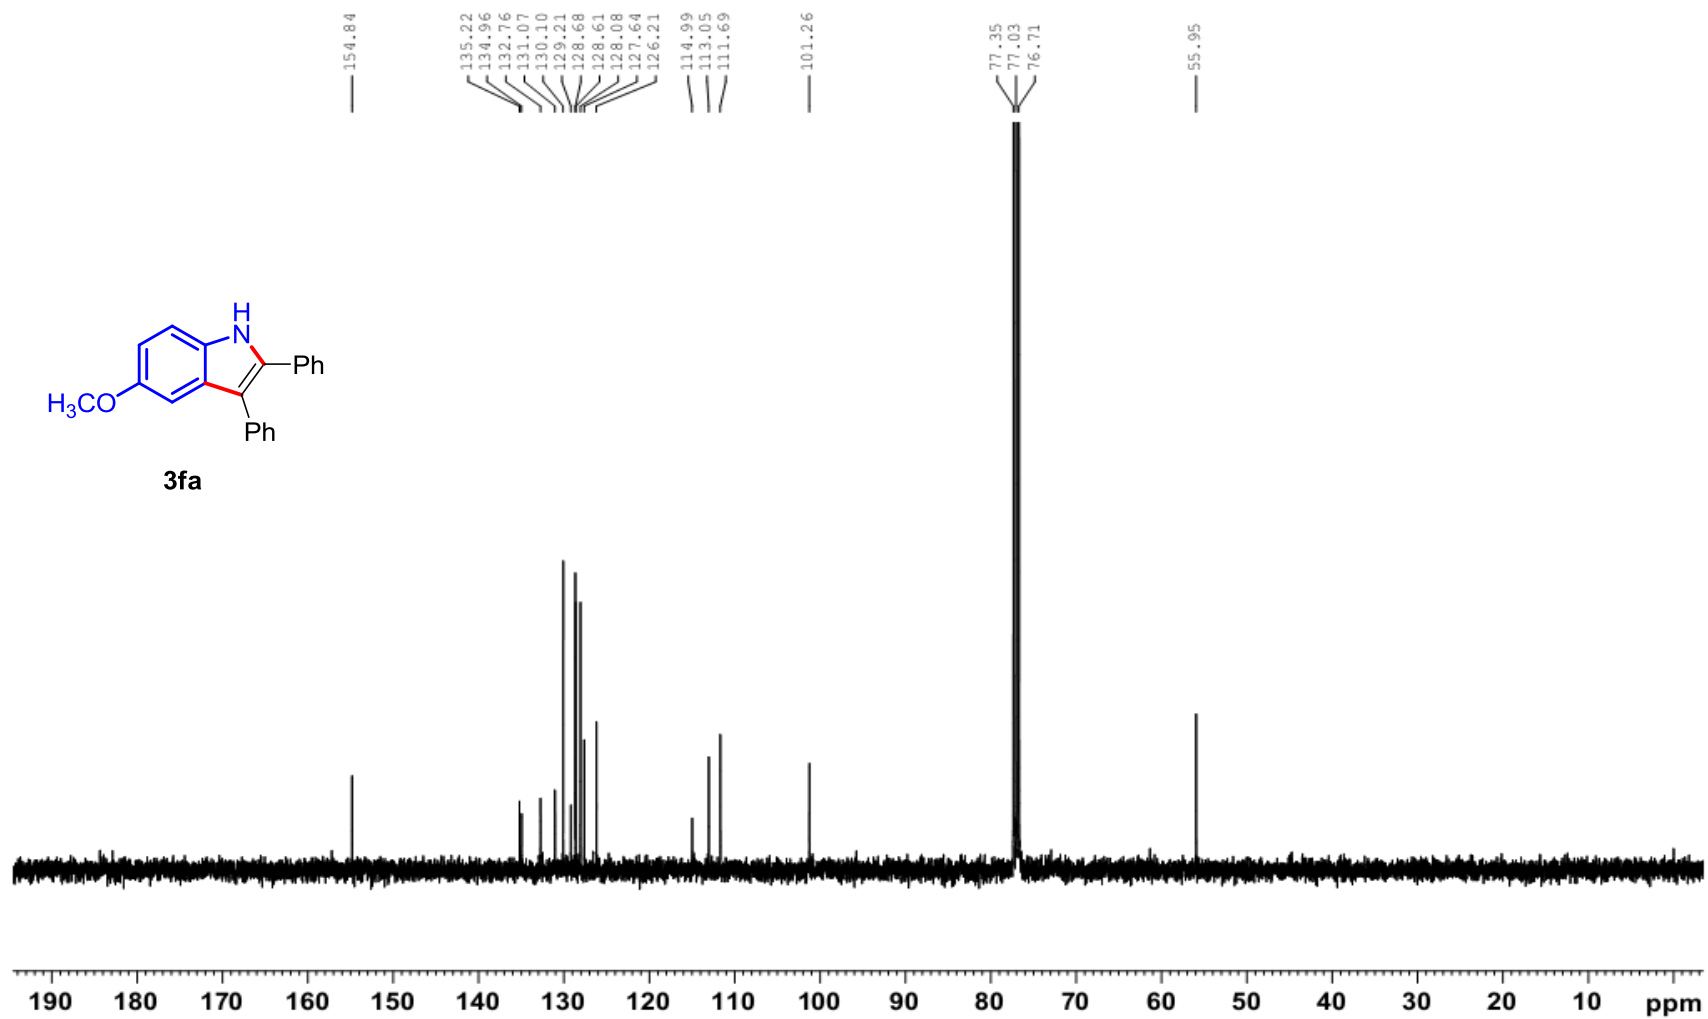

ZGY-130909-7-HNMR

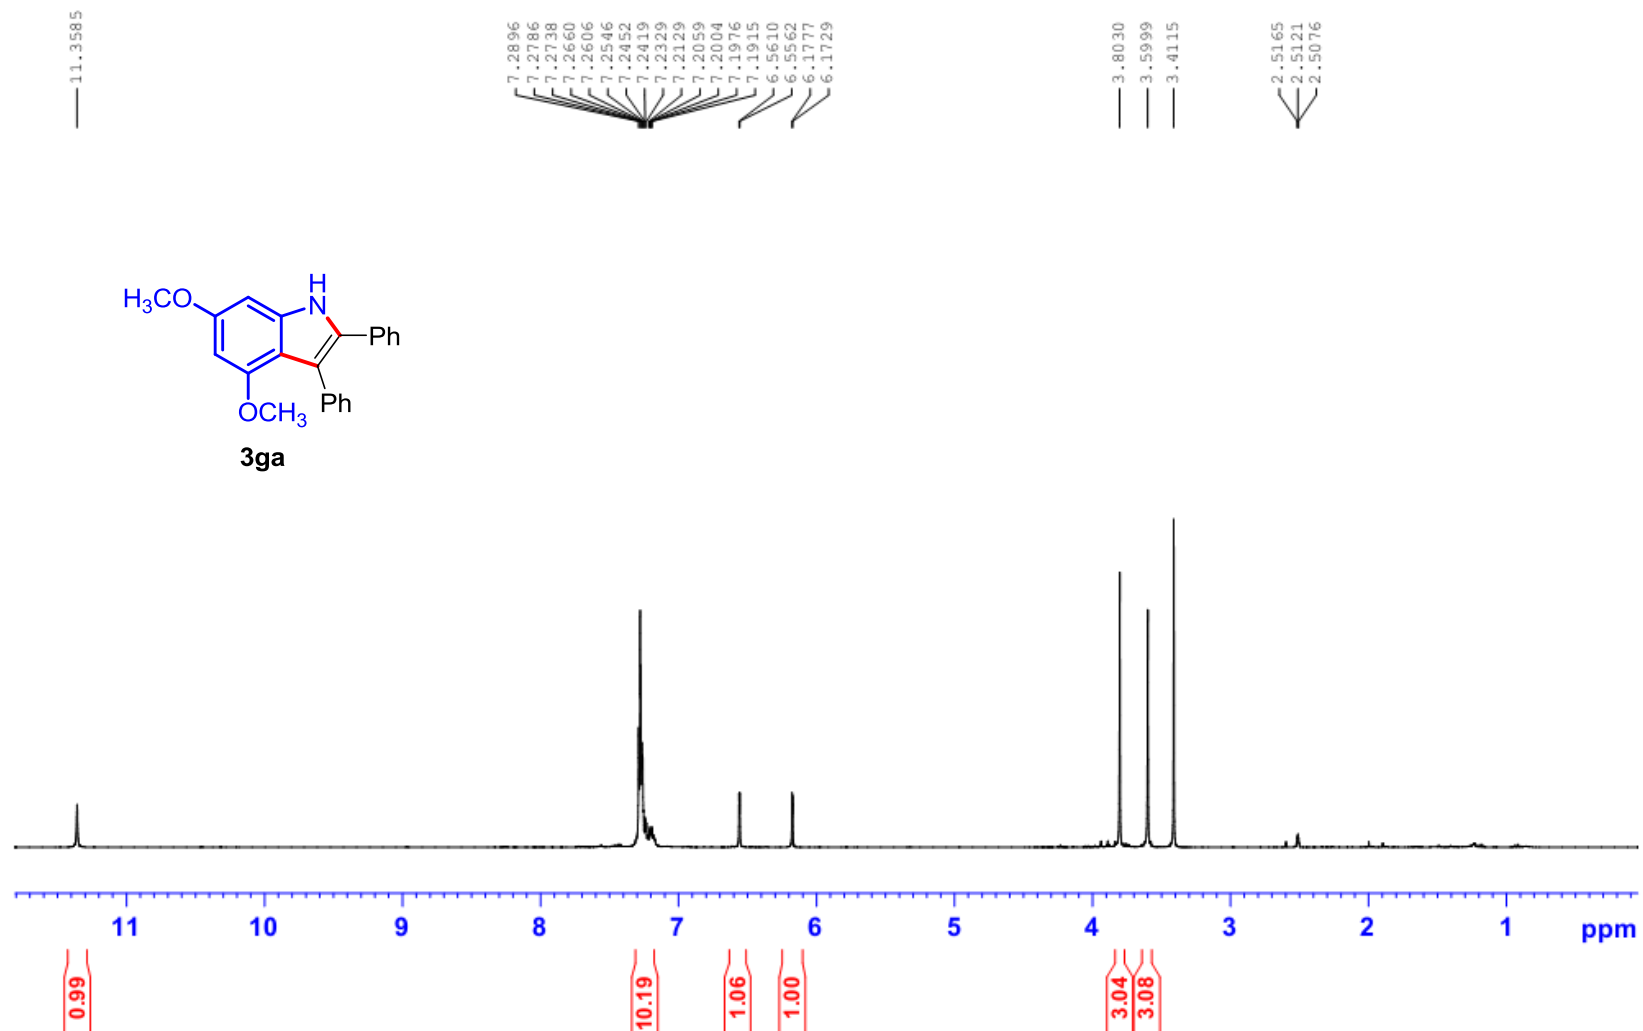

ZGY-130909-7-CNMR

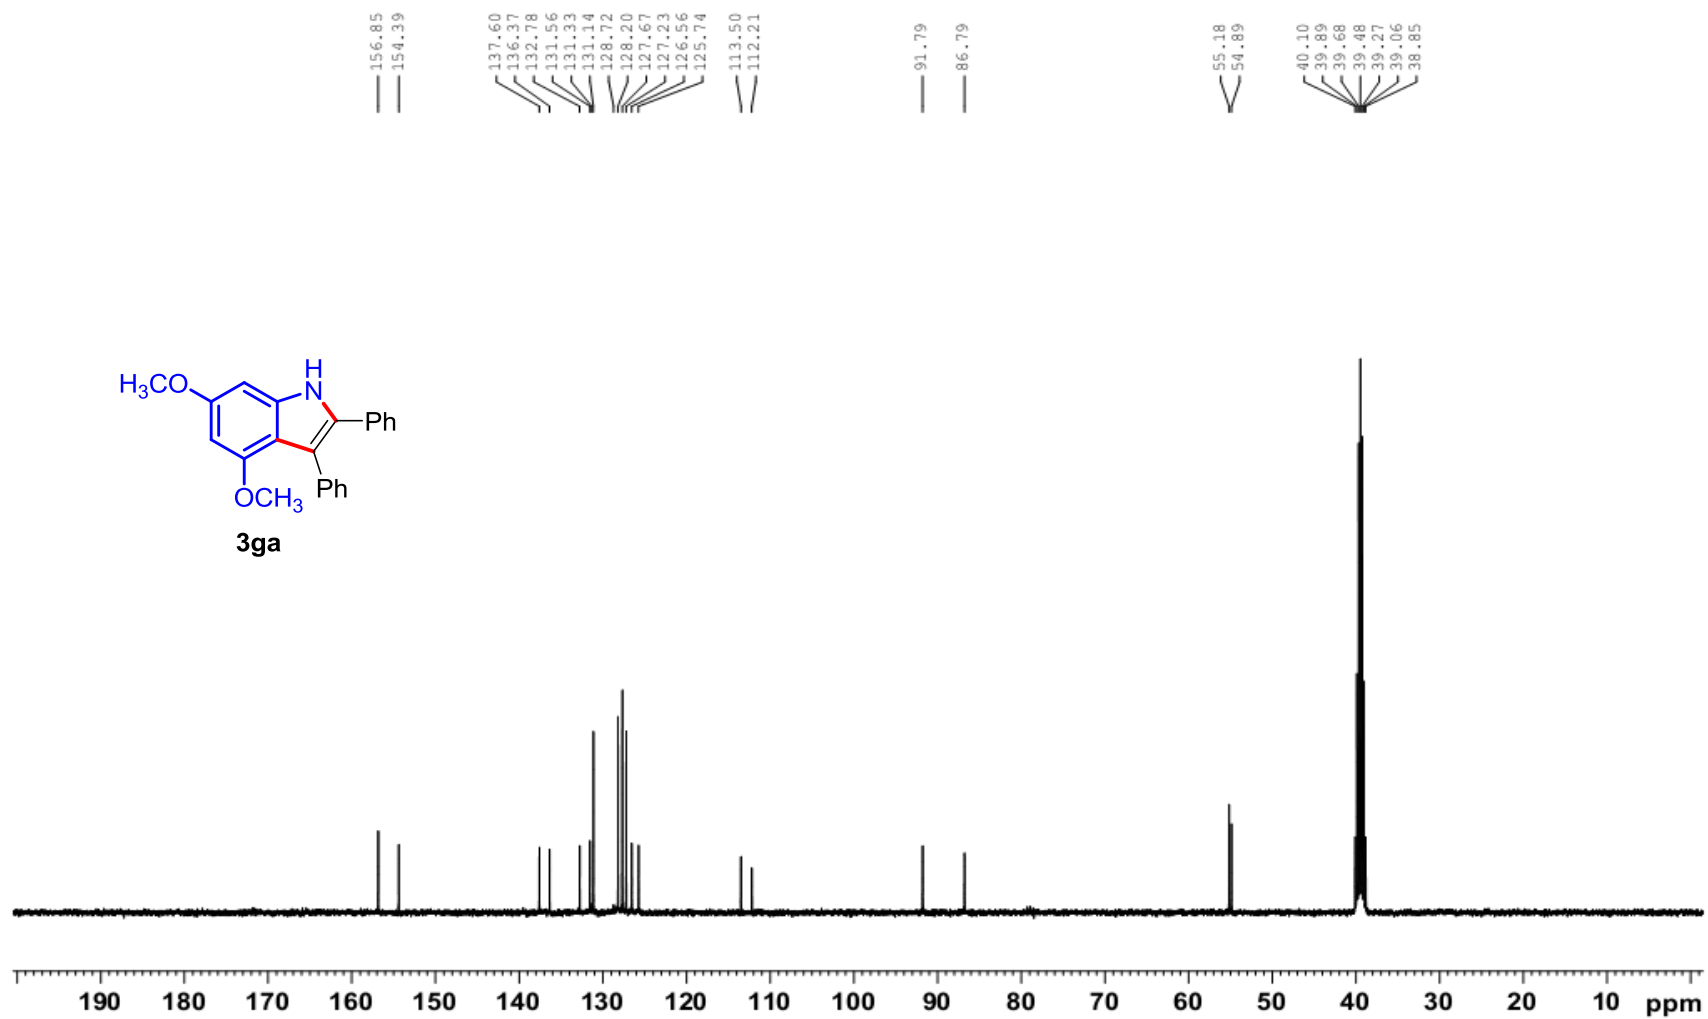

ZGY-130916-4-HNMR

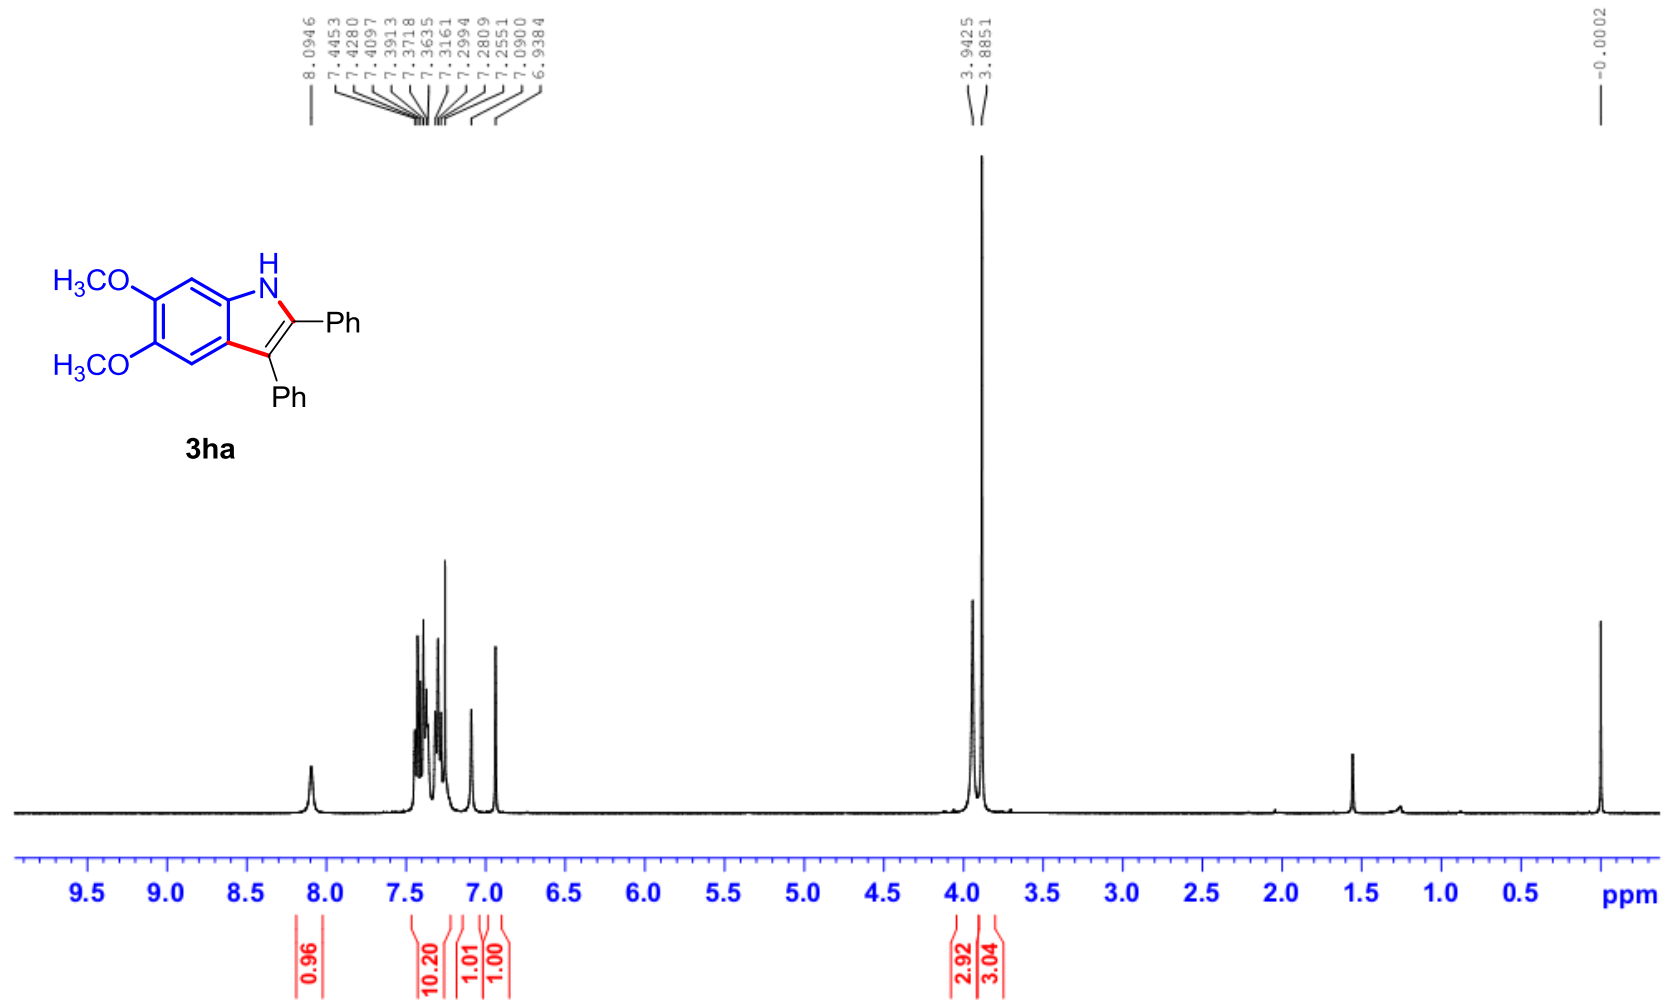



ZGY-131009-4-CNMR

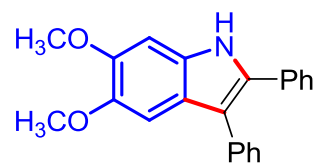

3ha

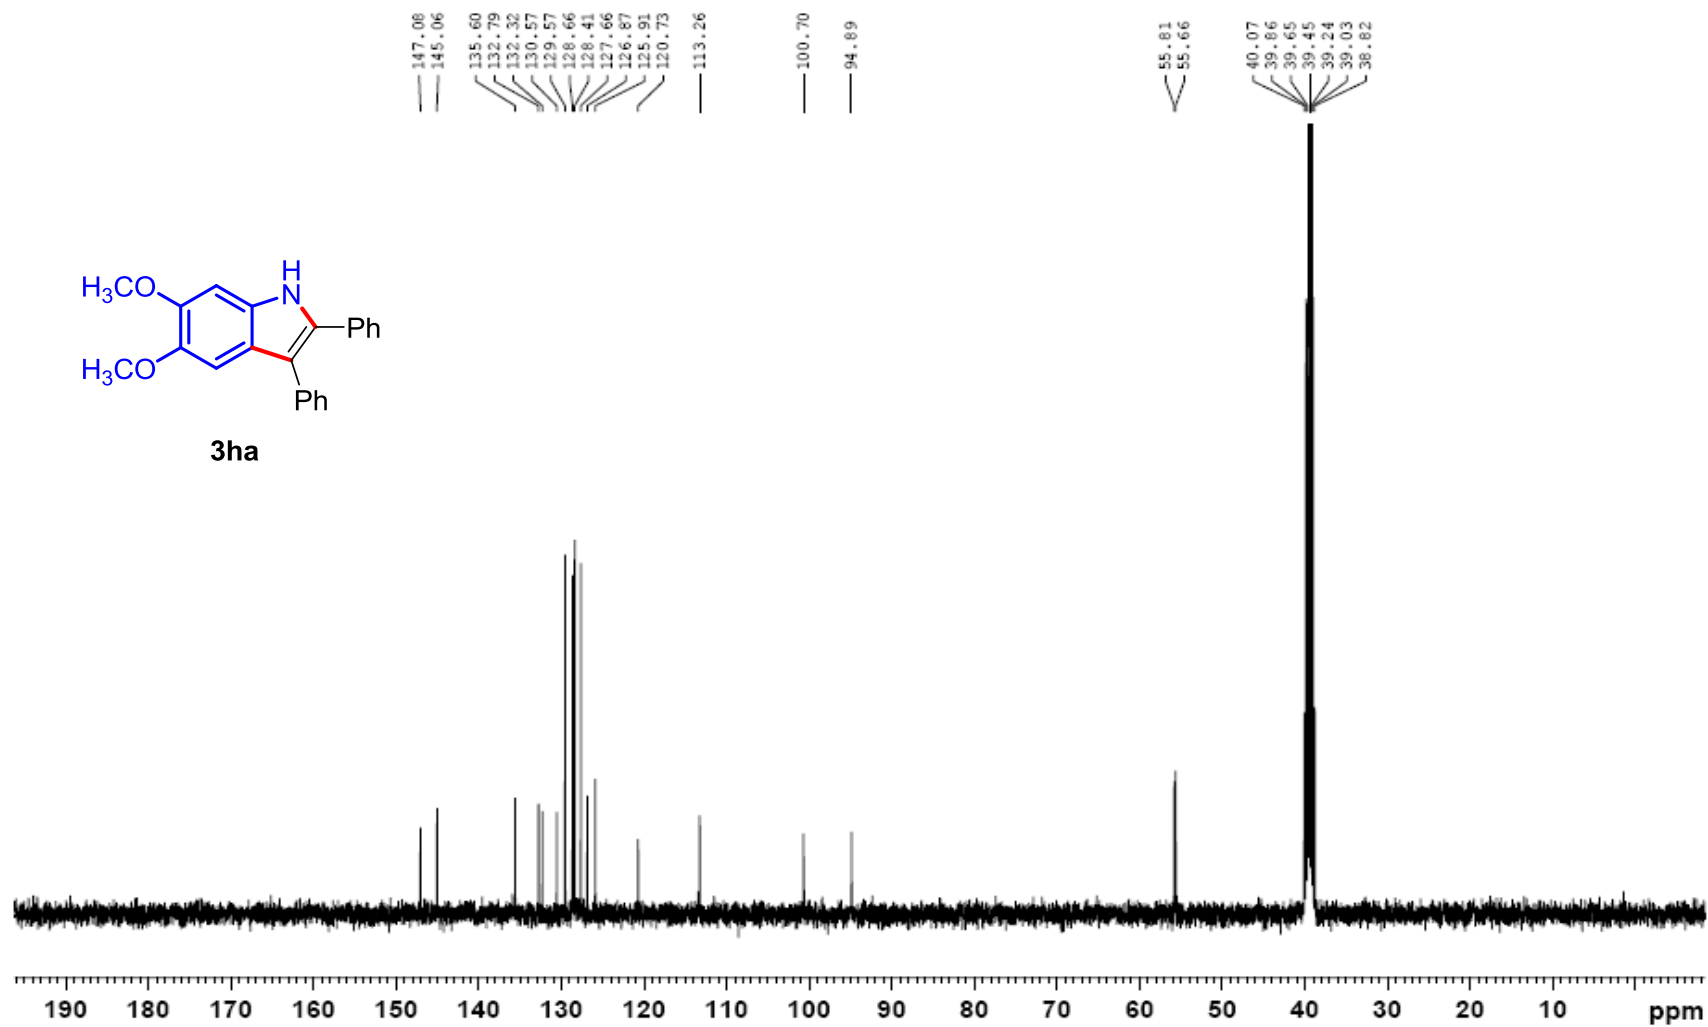

ZGY-130902-8-HNMR

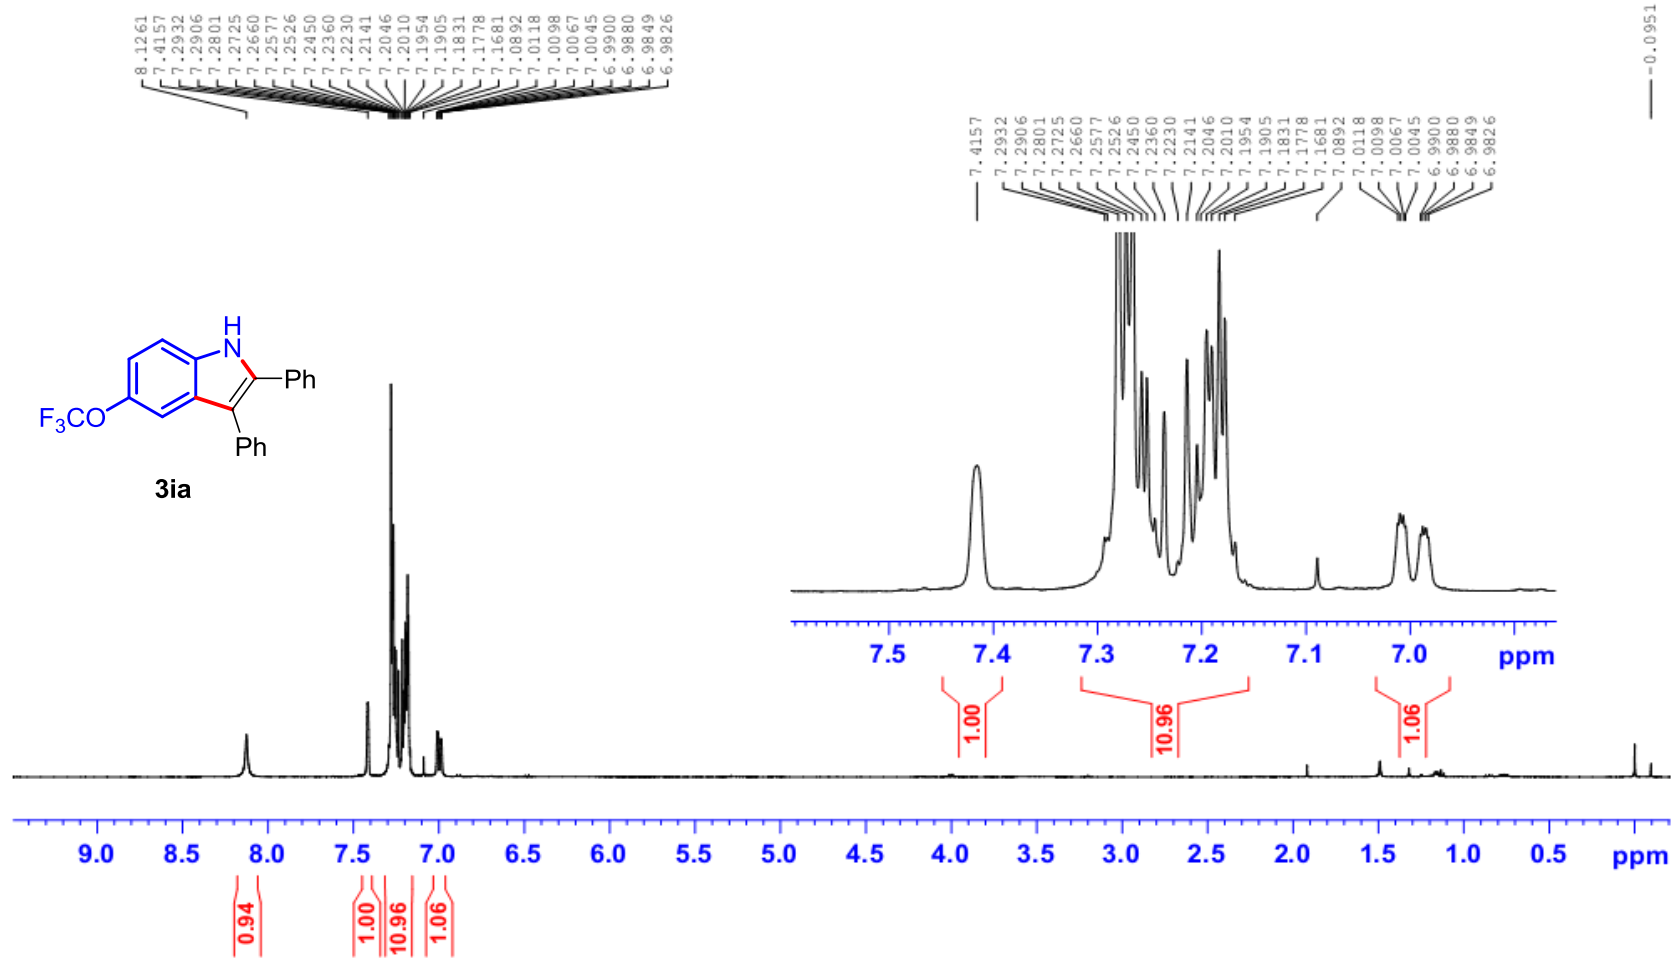

ZGY-130902-8-CNMR

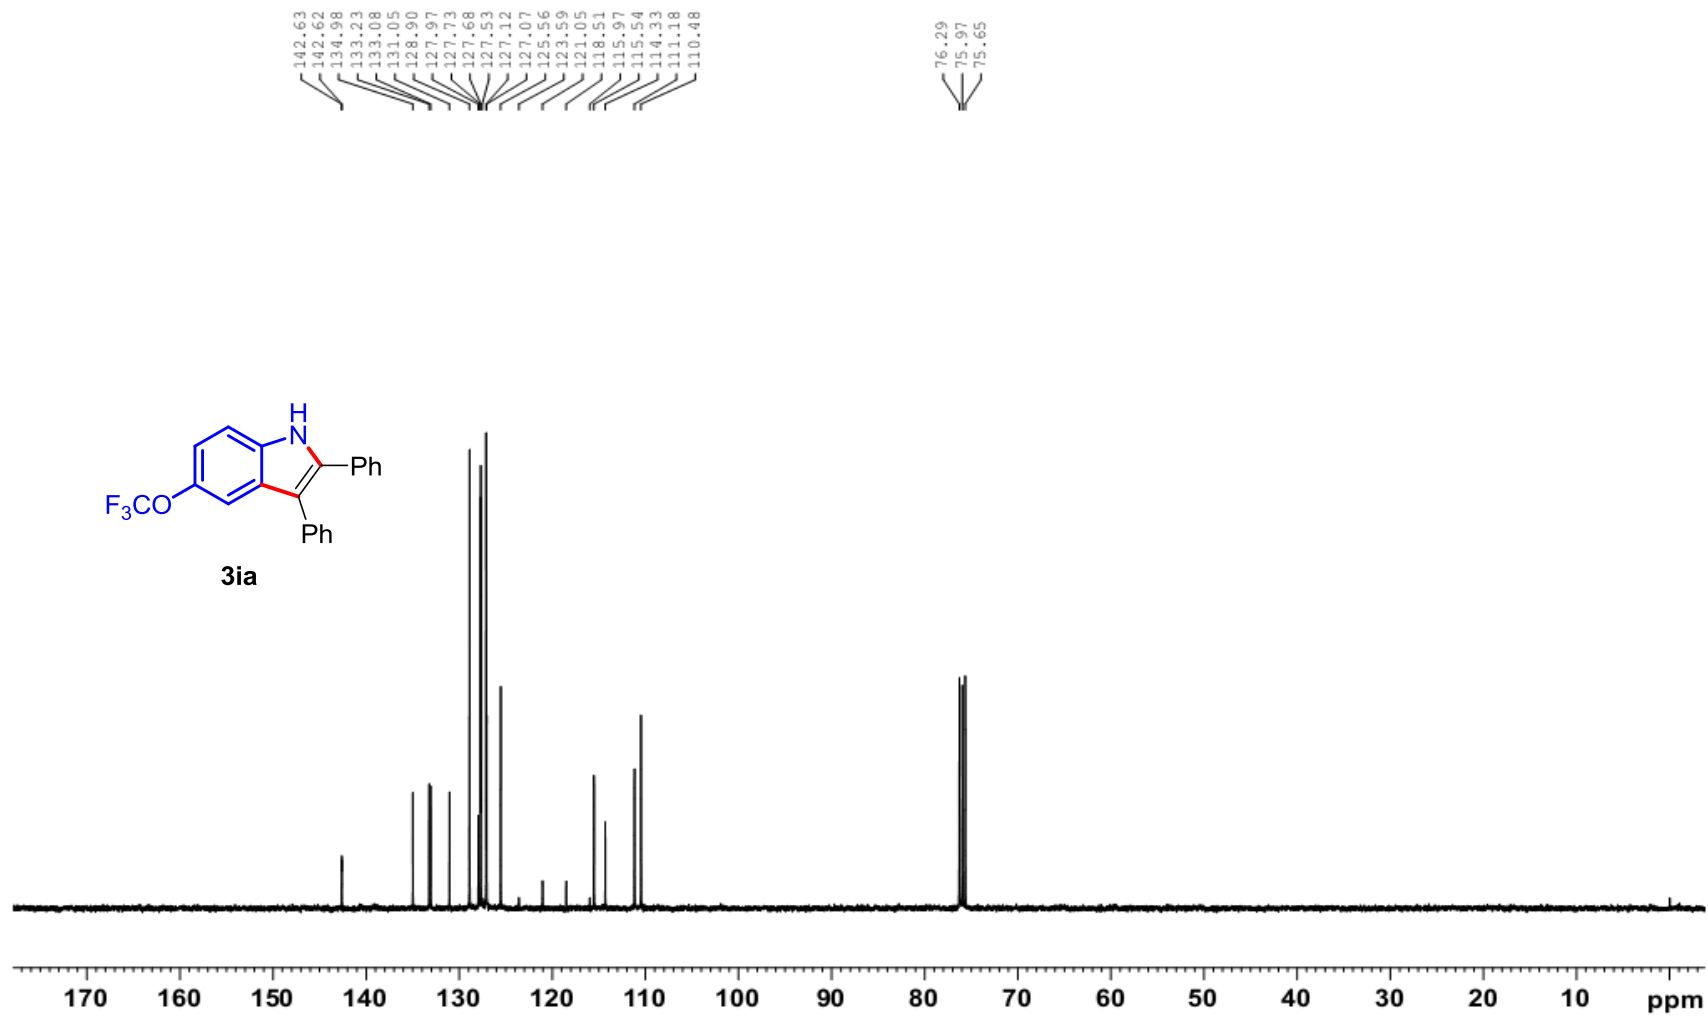

ZGY-X130911-1-FNMR

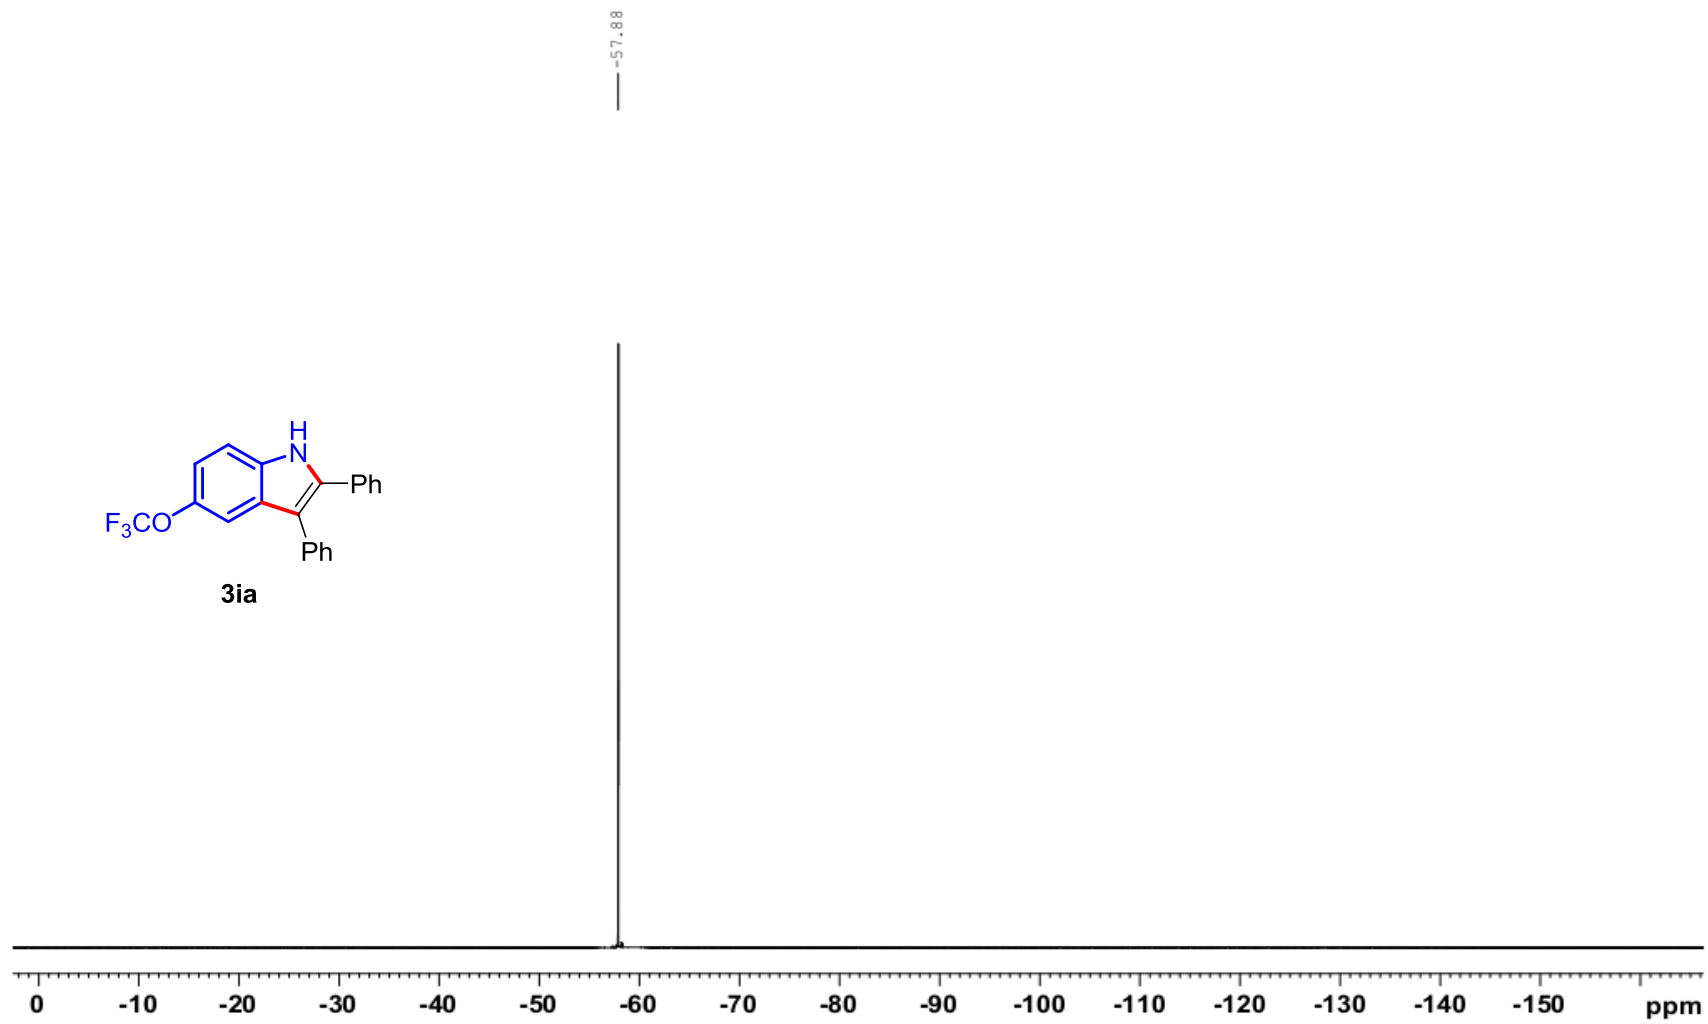

ZGY-130826-6-HNMR

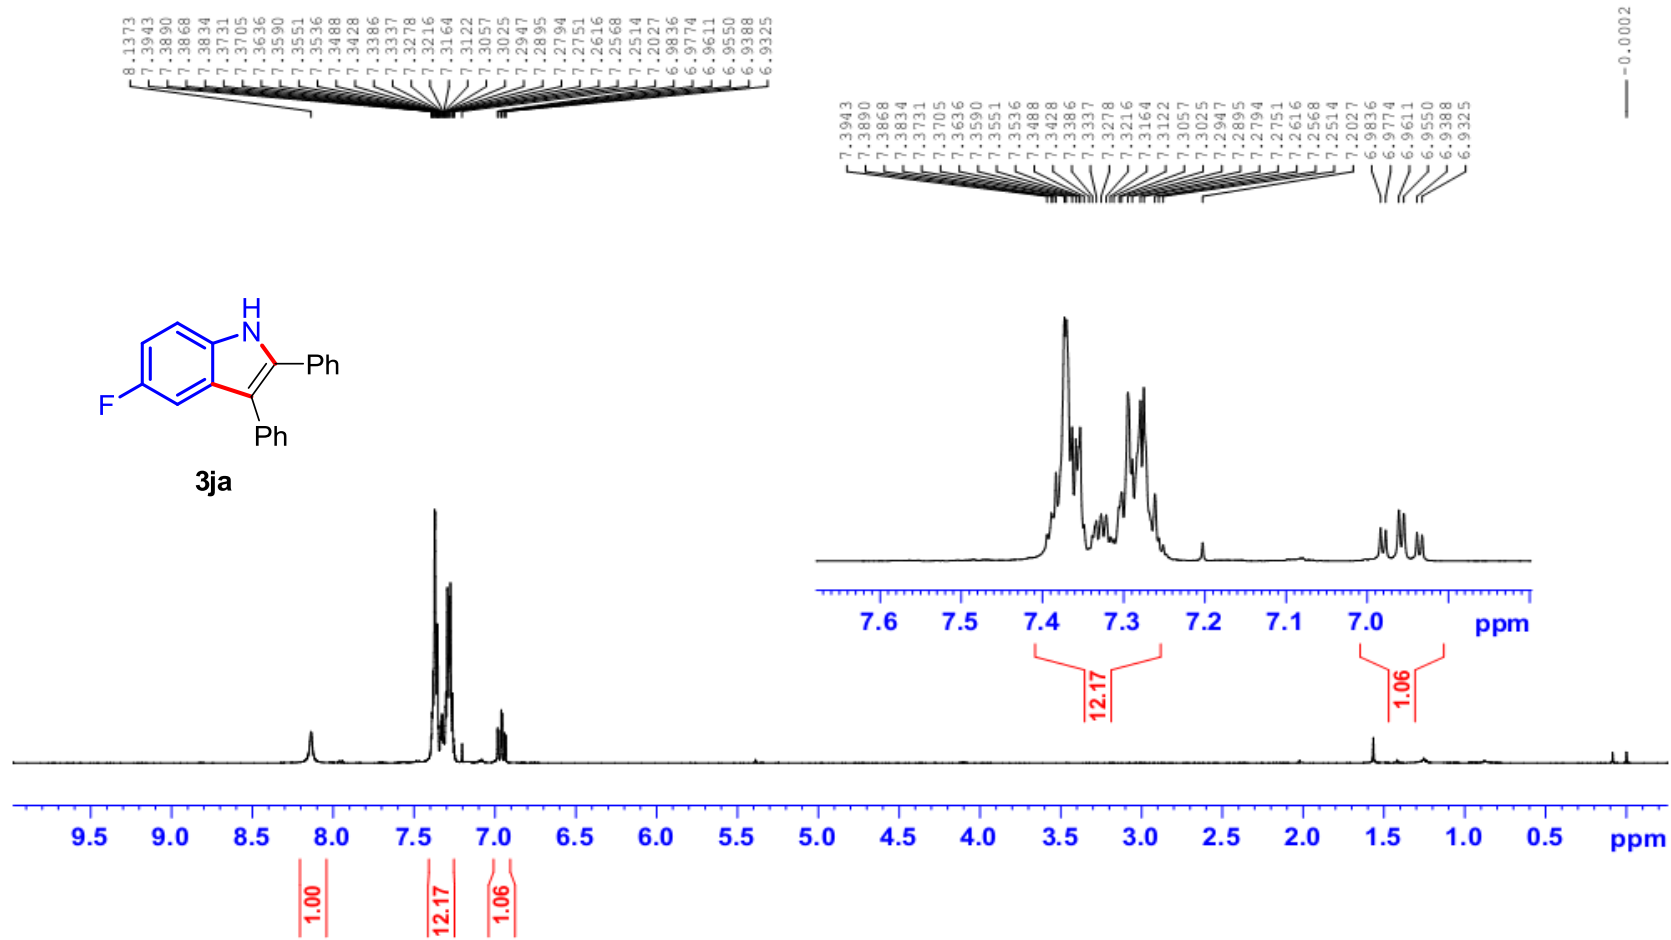

ZGY-130826-6-CNMR

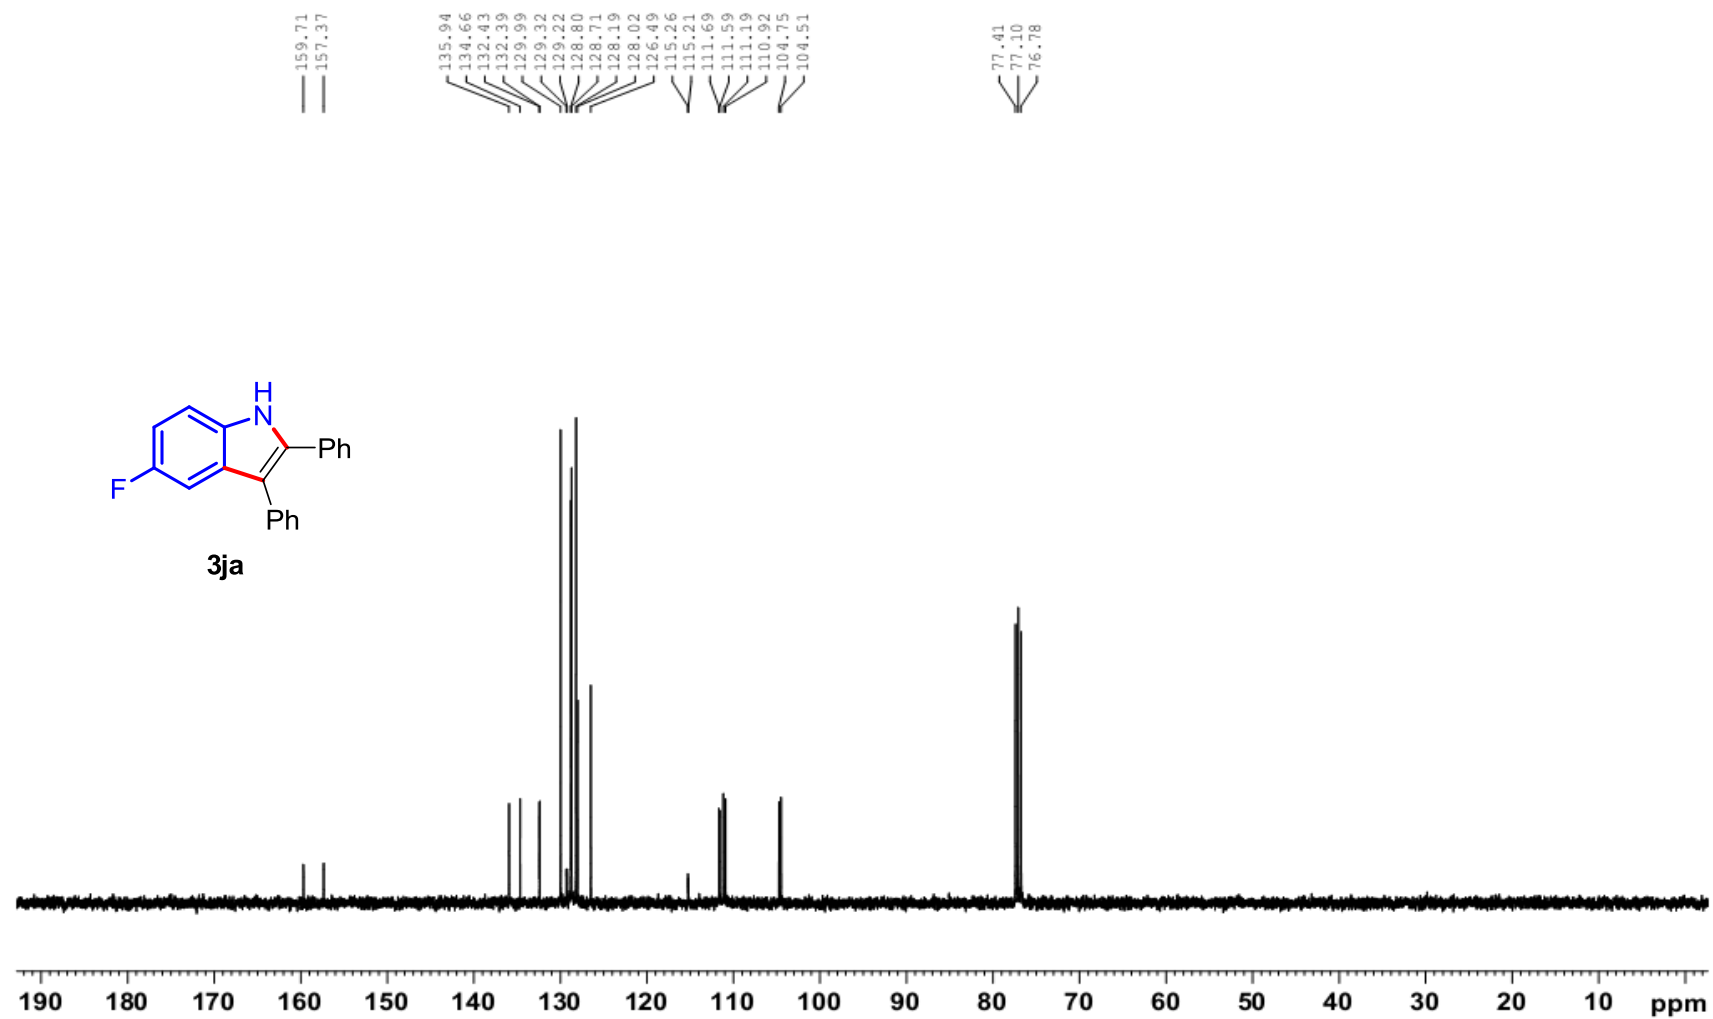

ZGY-130826-6-FNMR

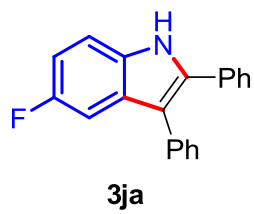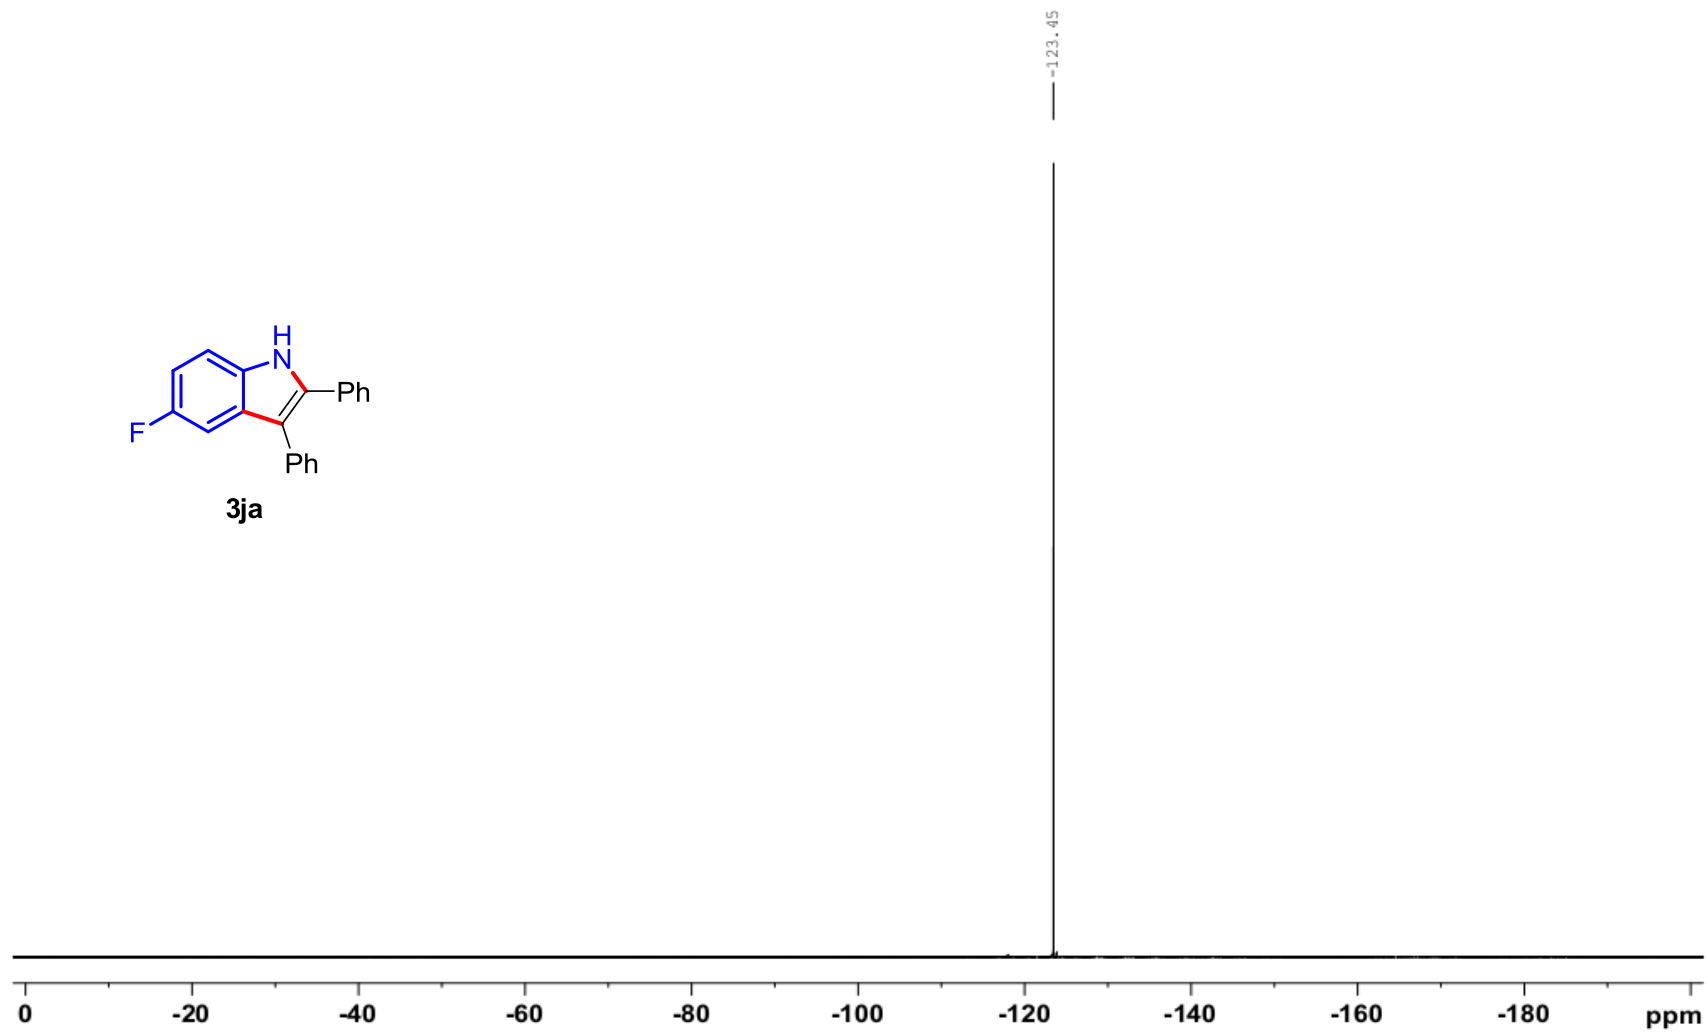

ZGY-130826-2-HNMR

8.2144  
7.6256  
7.6207  
7.4059  
7.4005  
7.3961  
7.3866  
7.3815  
7.3792  
7.3740  
7.3730  
7.3666  
7.3586  
7.3548  
7.3523  
7.3412  
7.3372  
7.3320  
7.3284  
7.3183  
7.3147  
7.3075  
7.3031  
7.3008  
7.2897  
7.2866  
7.2825  
7.2741  
7.2379  
7.1904  
7.1854  
7.1690  
7.1639

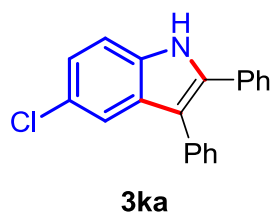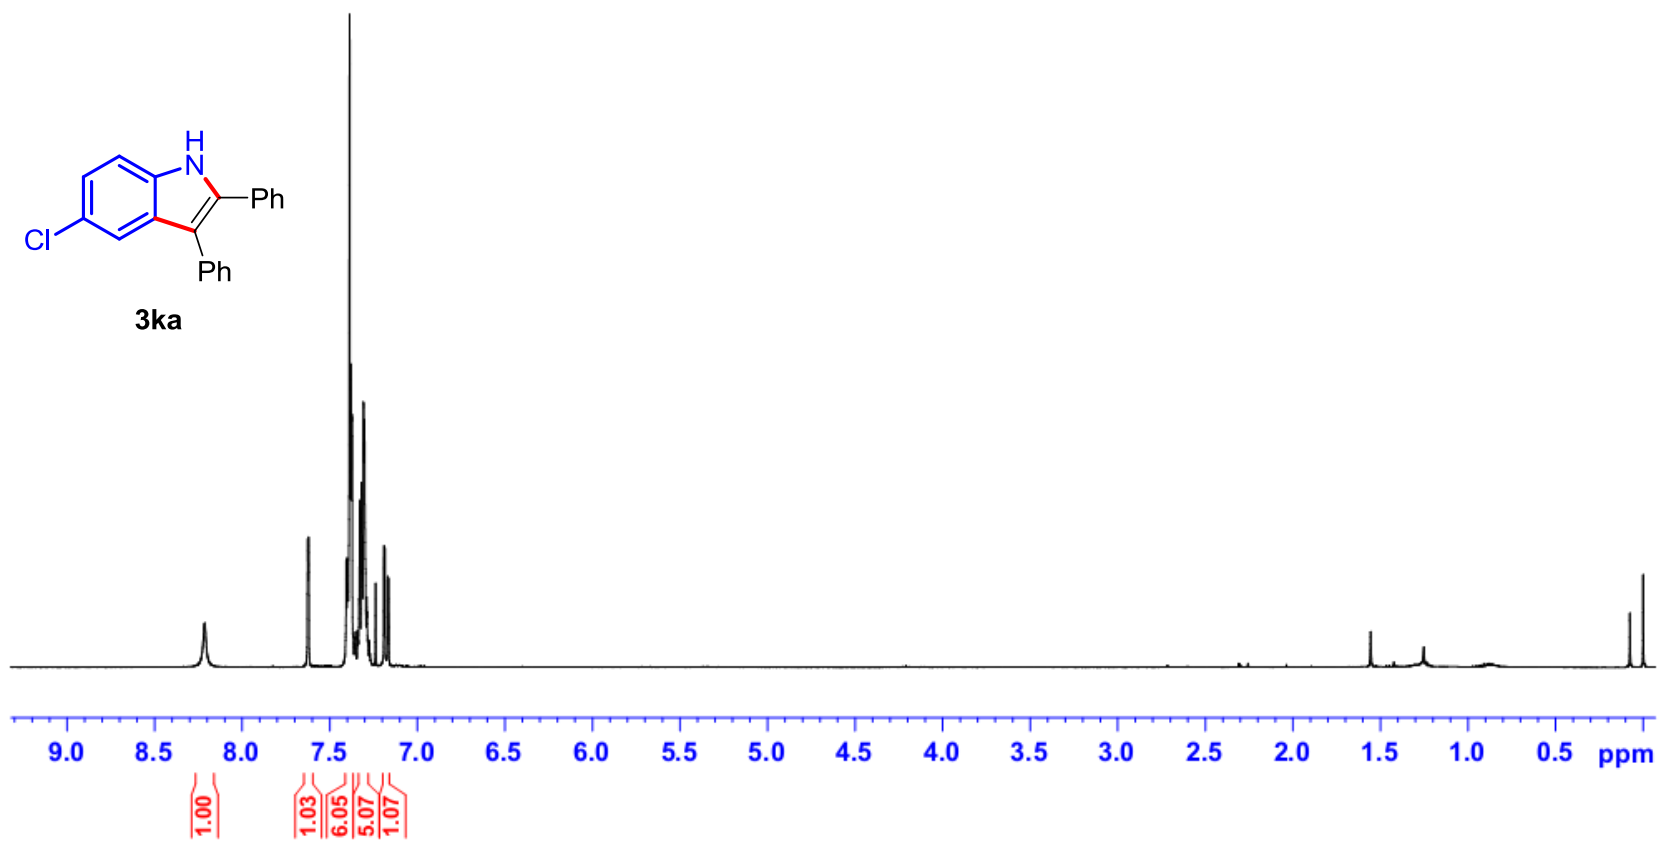



ZGY-130826-2-CNMR

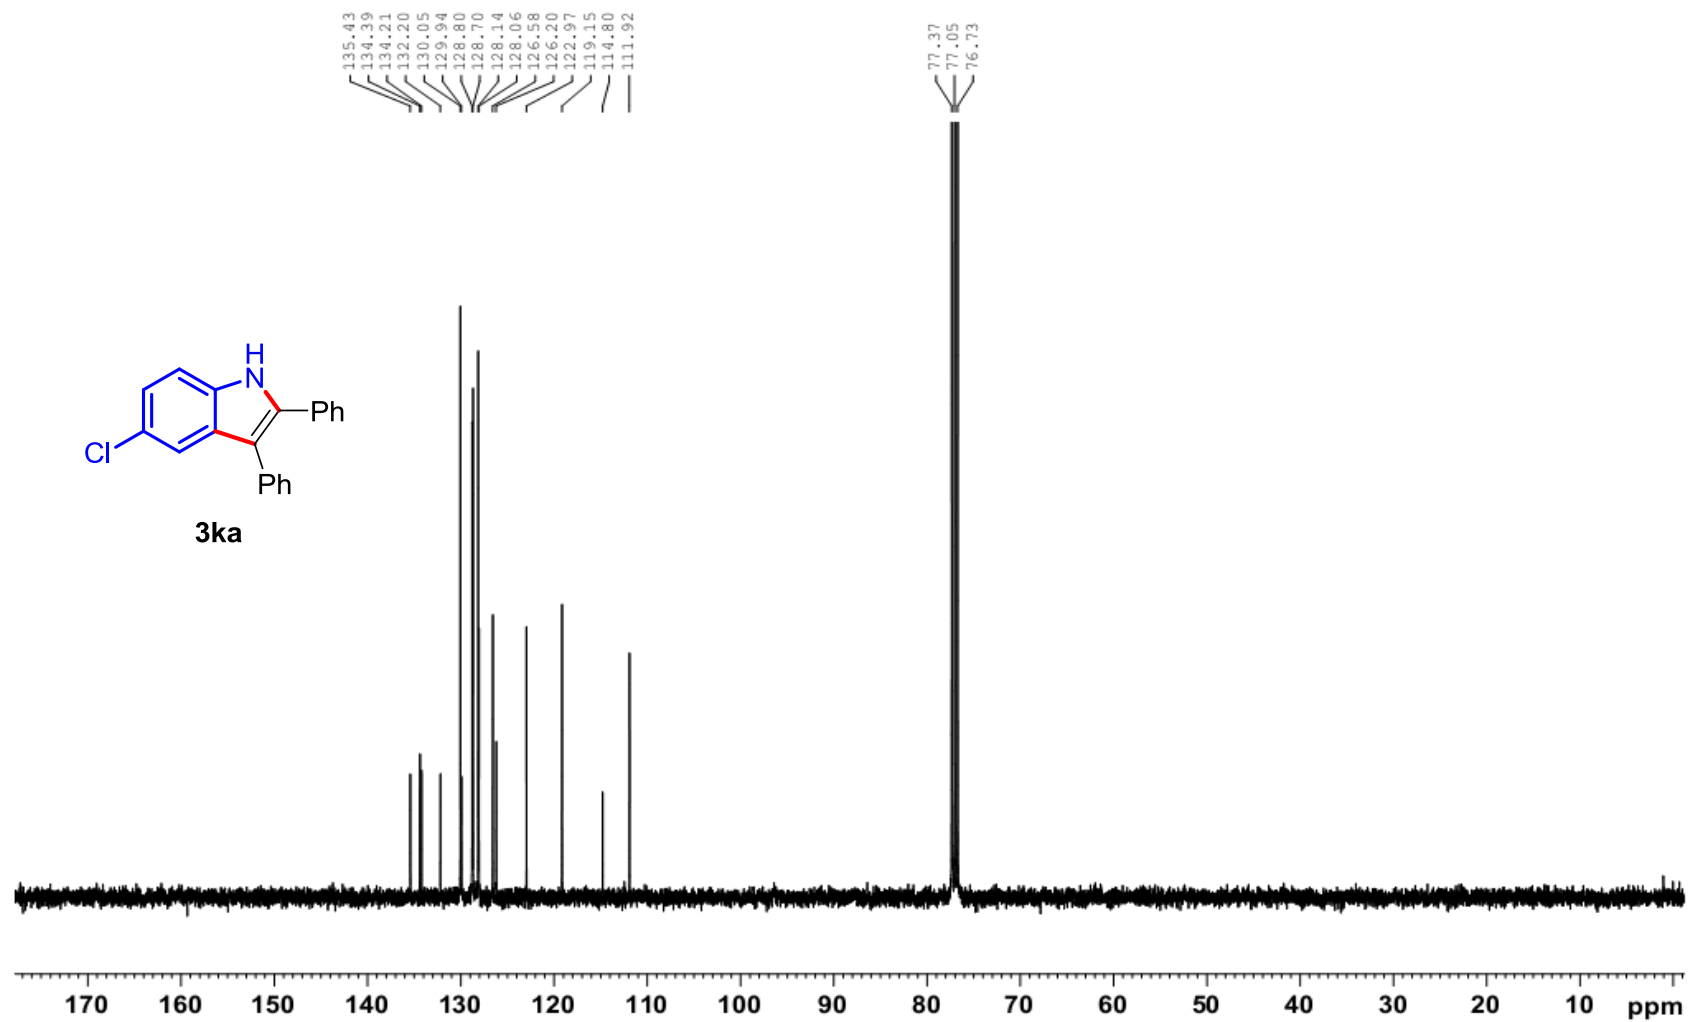

ZGY-130902-12-HNMR

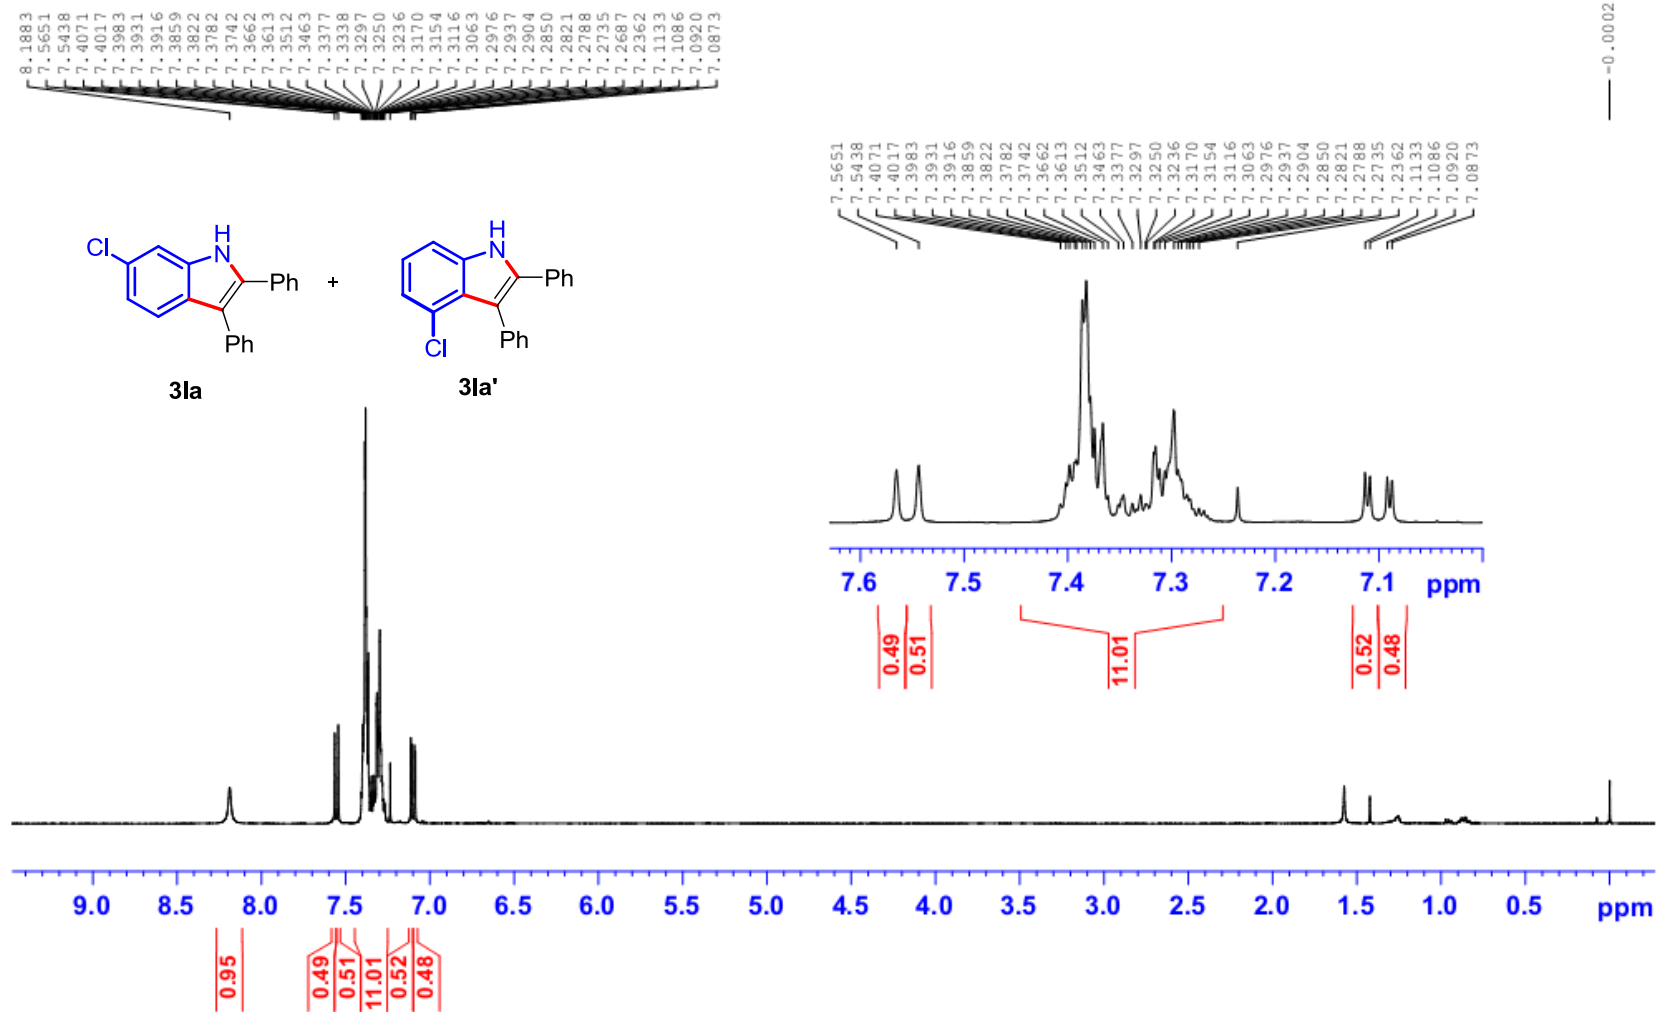

ZGY-130902-12-CNMR

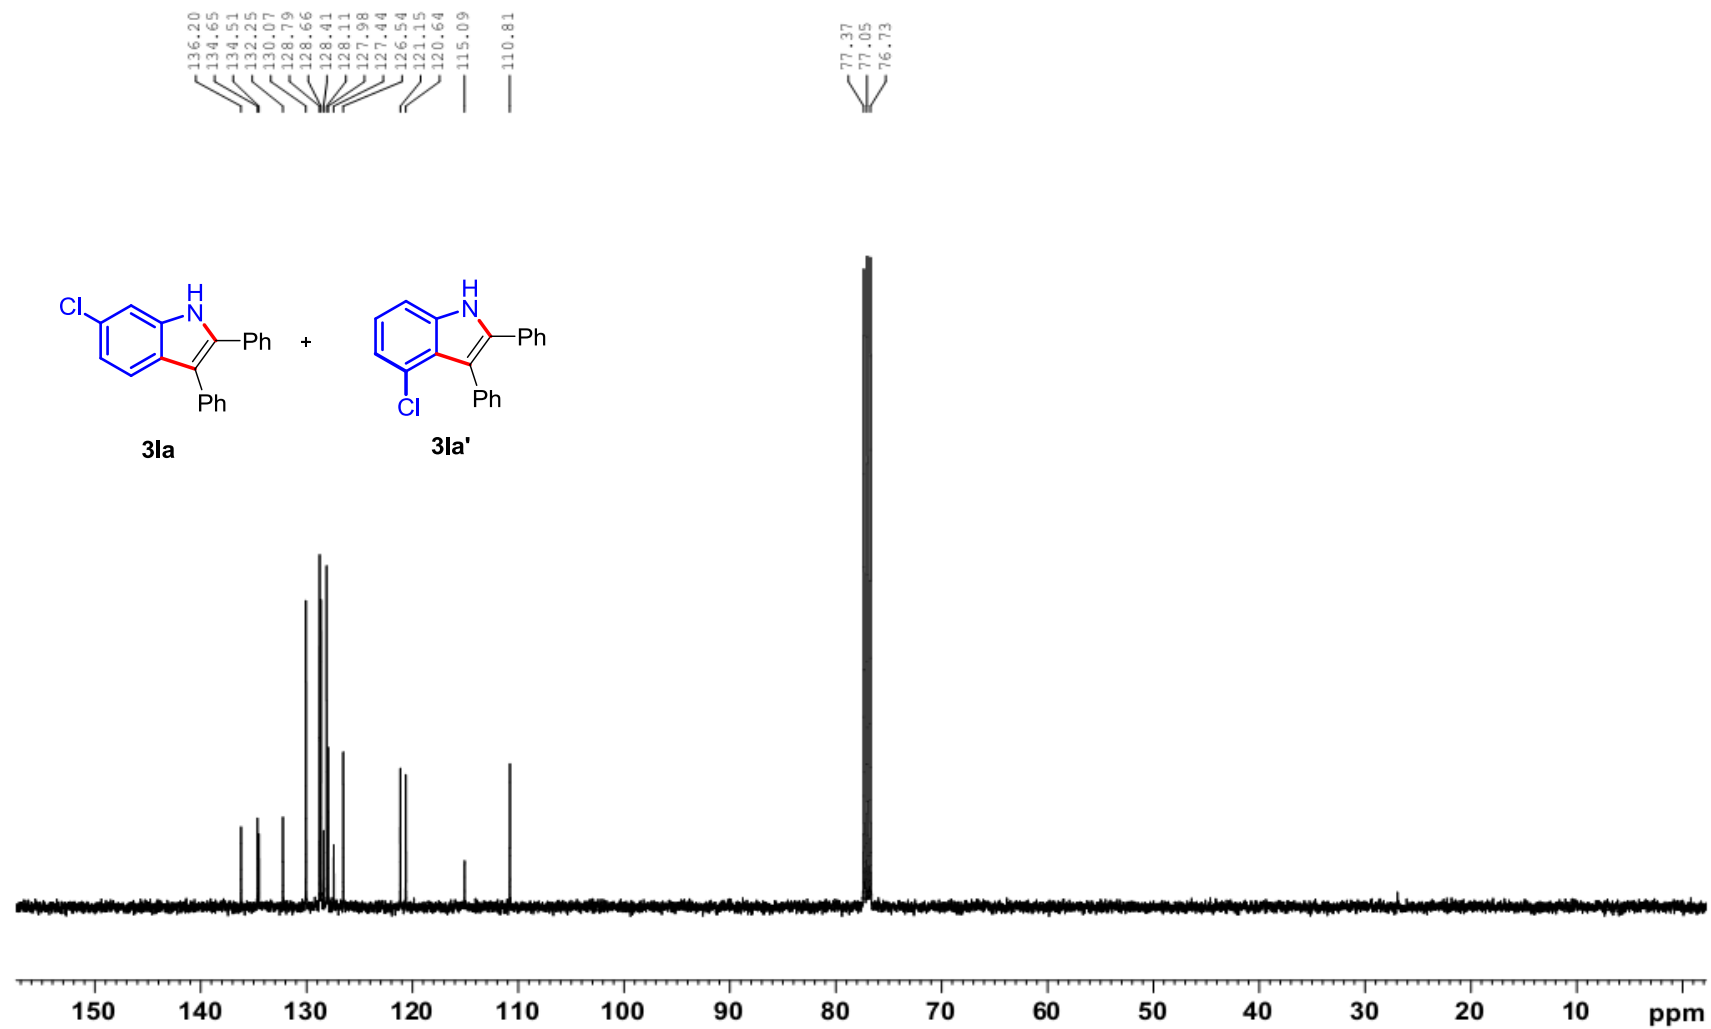

04-13-ZhangCY-HNMR

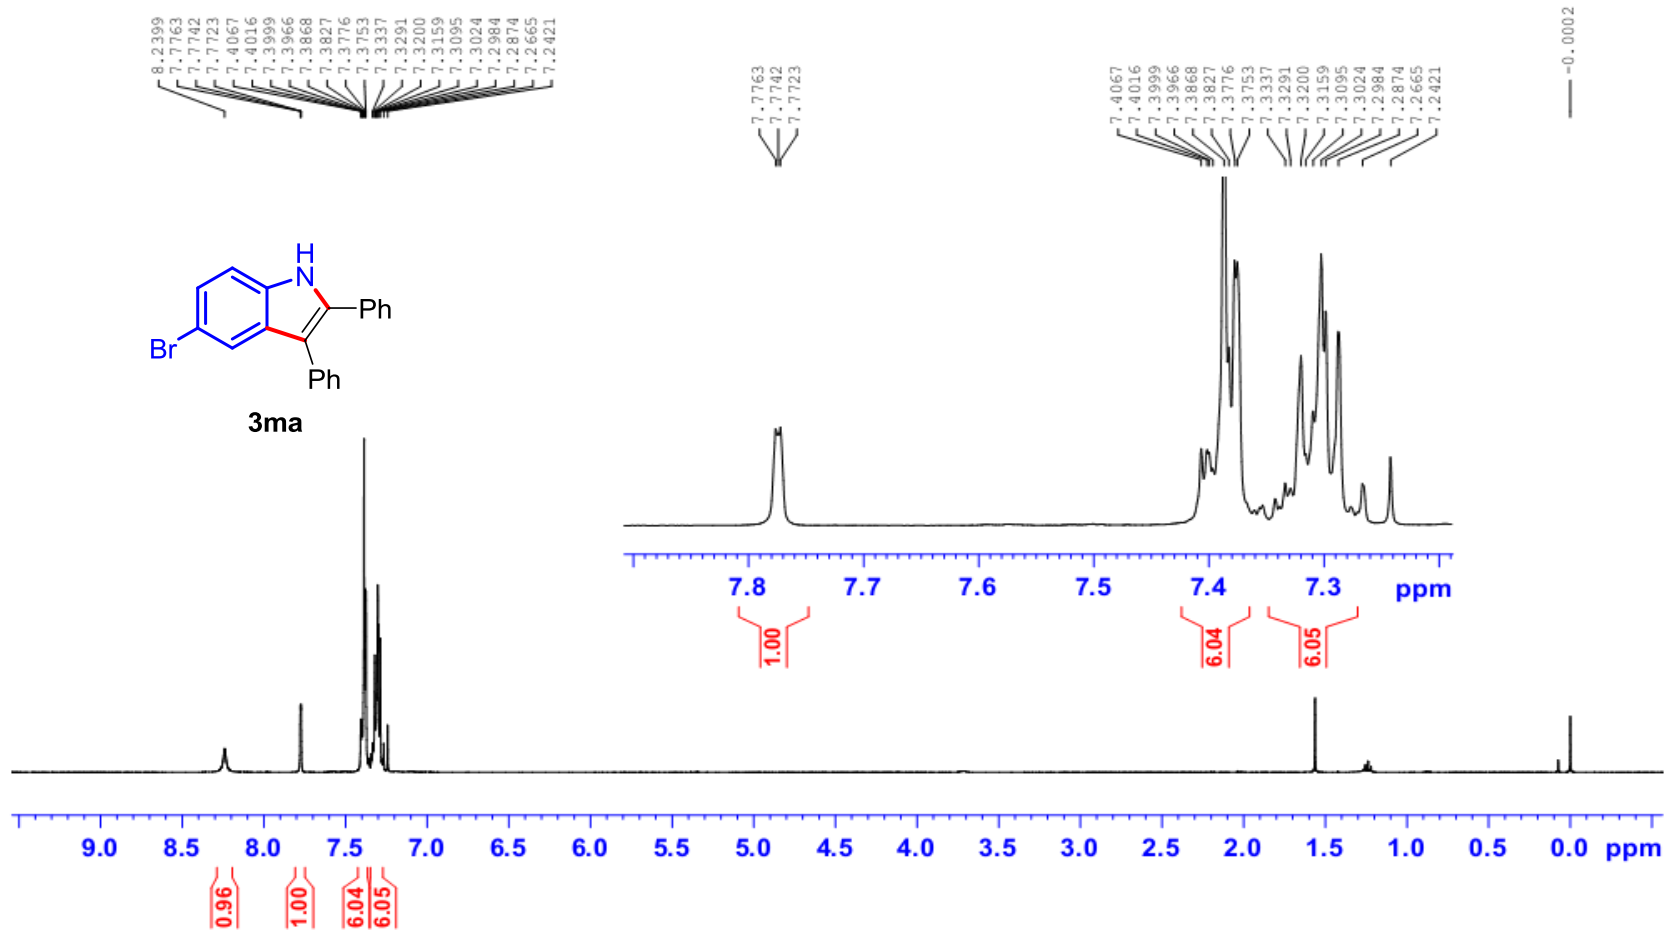

ZGY-130902-1-CNMR

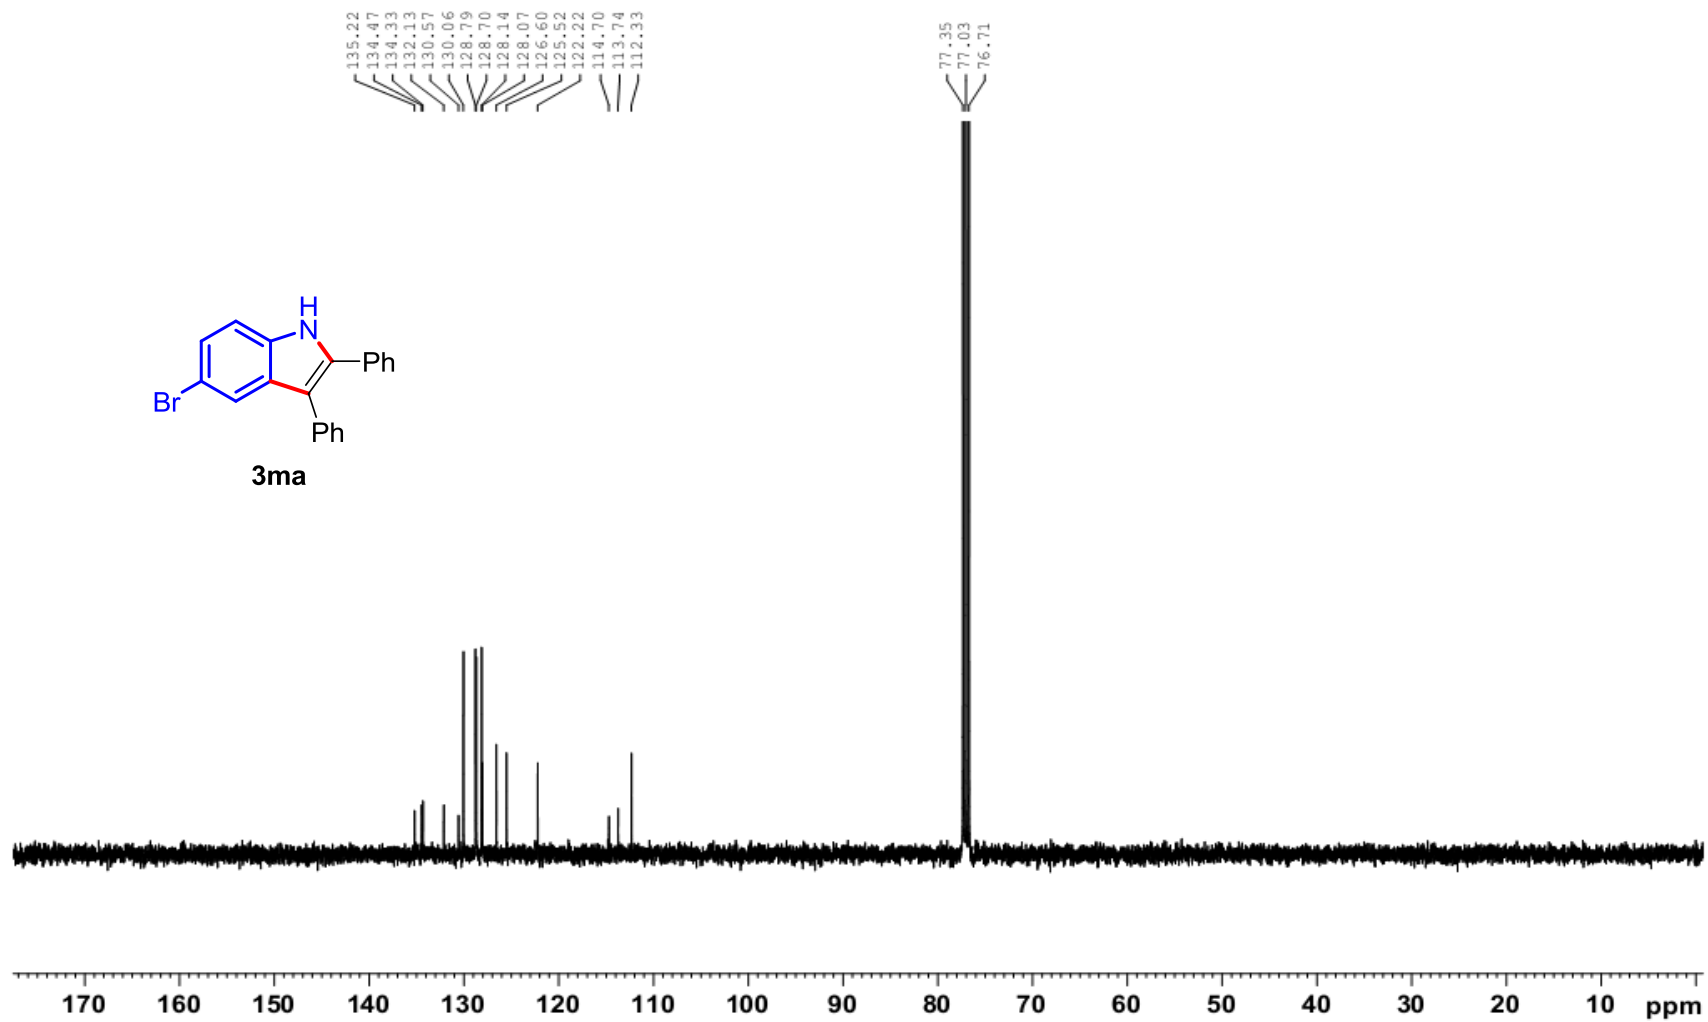

ZGY-130909-8-HNMR

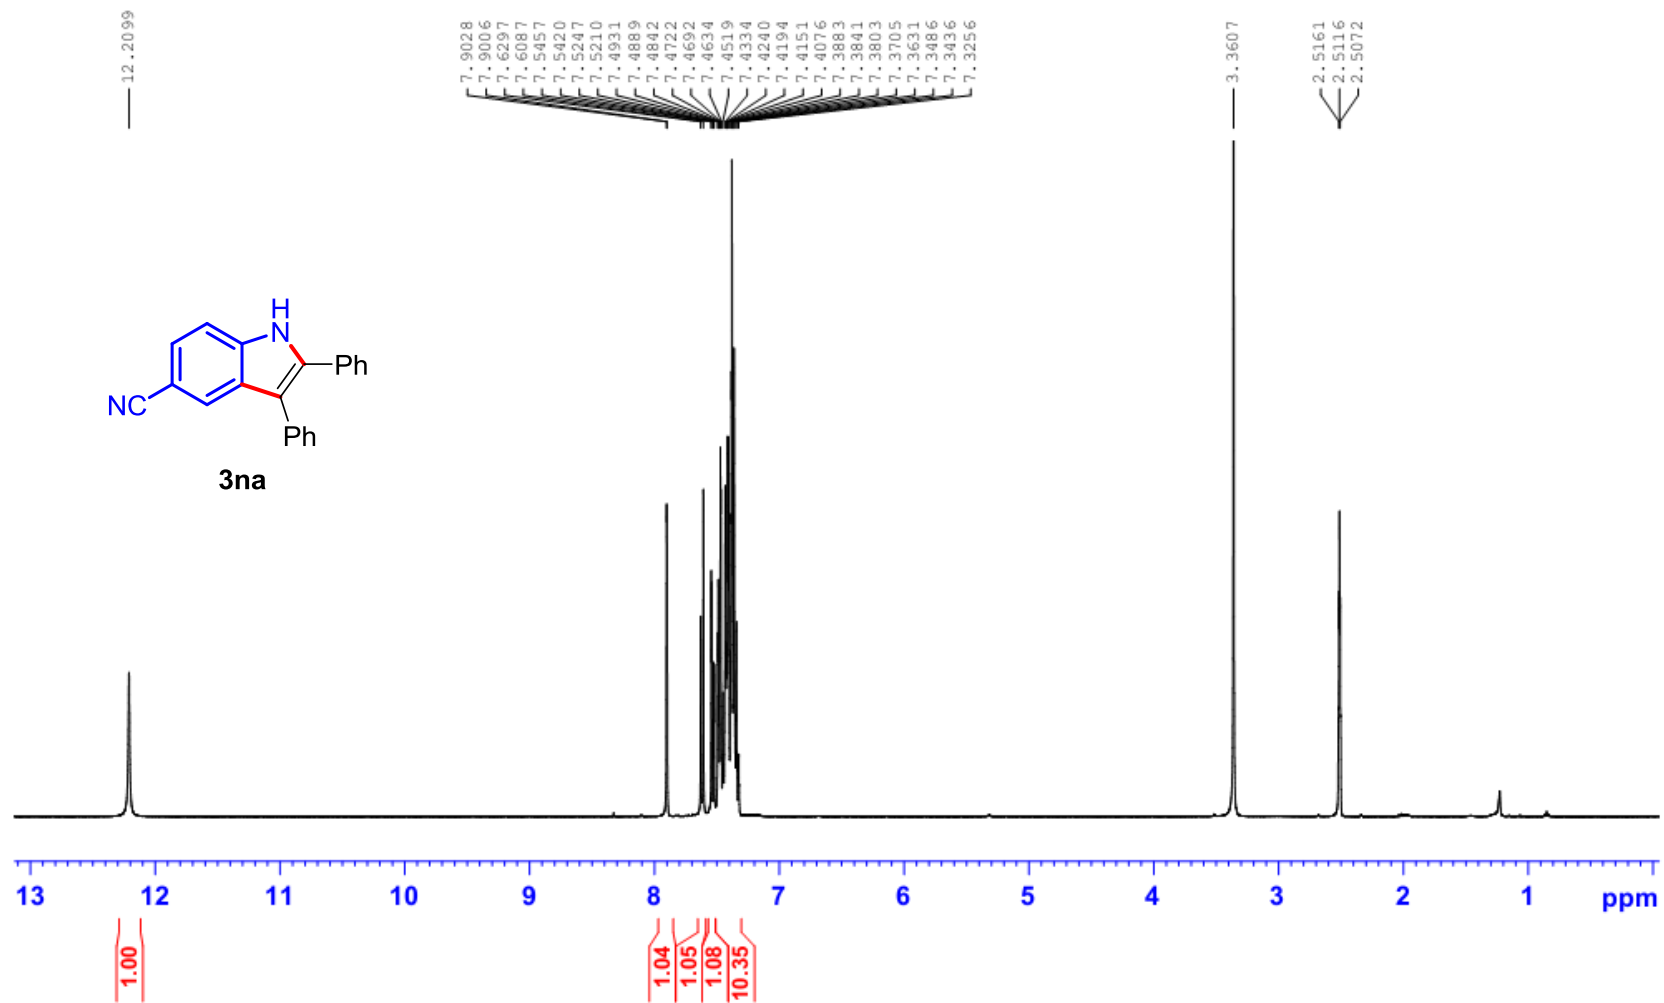

ZGY-130909-8-CNMR

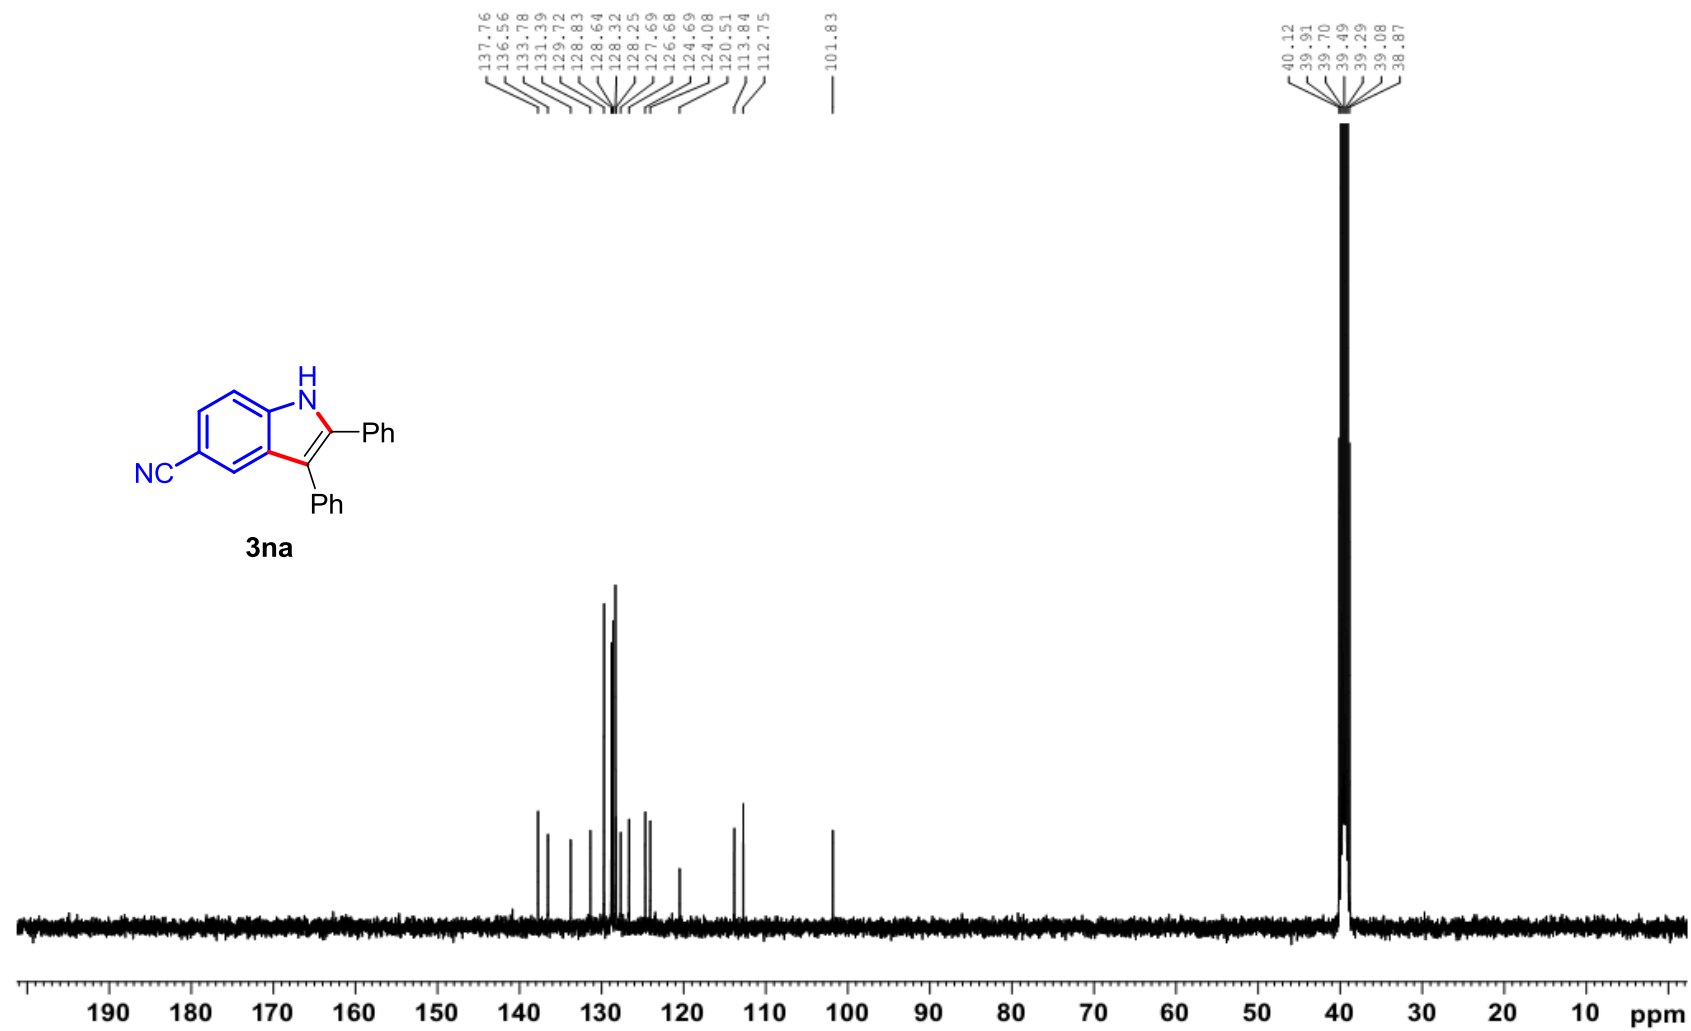

ZGY-130922-1-HNMR

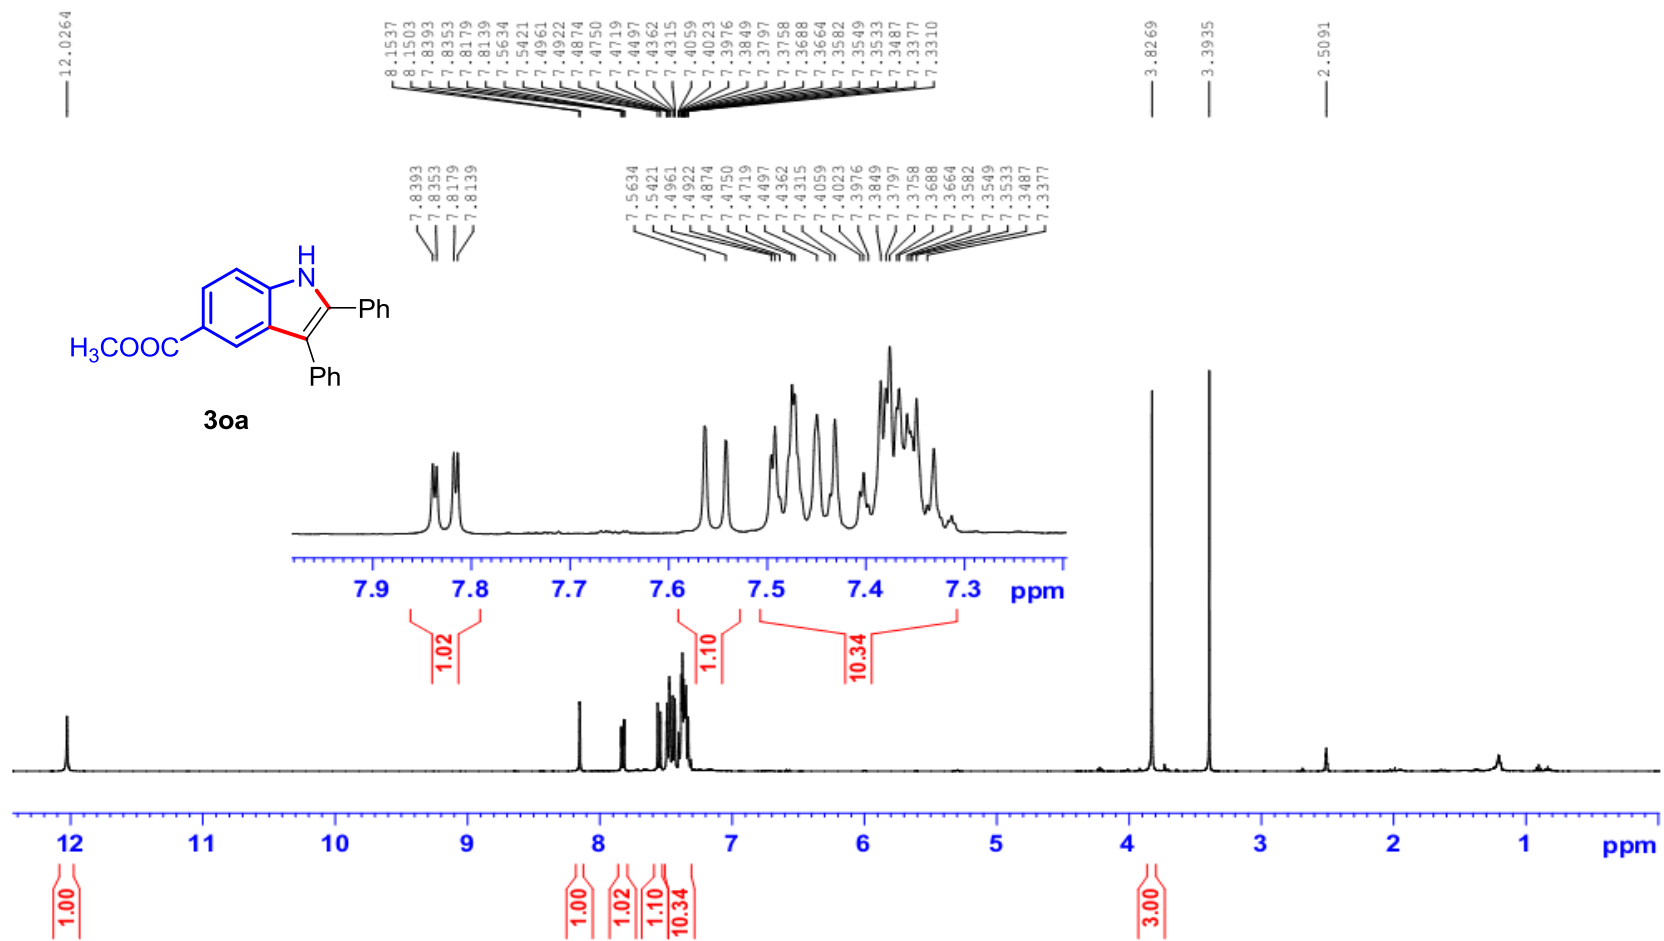



HJH-130922-1-CNMR

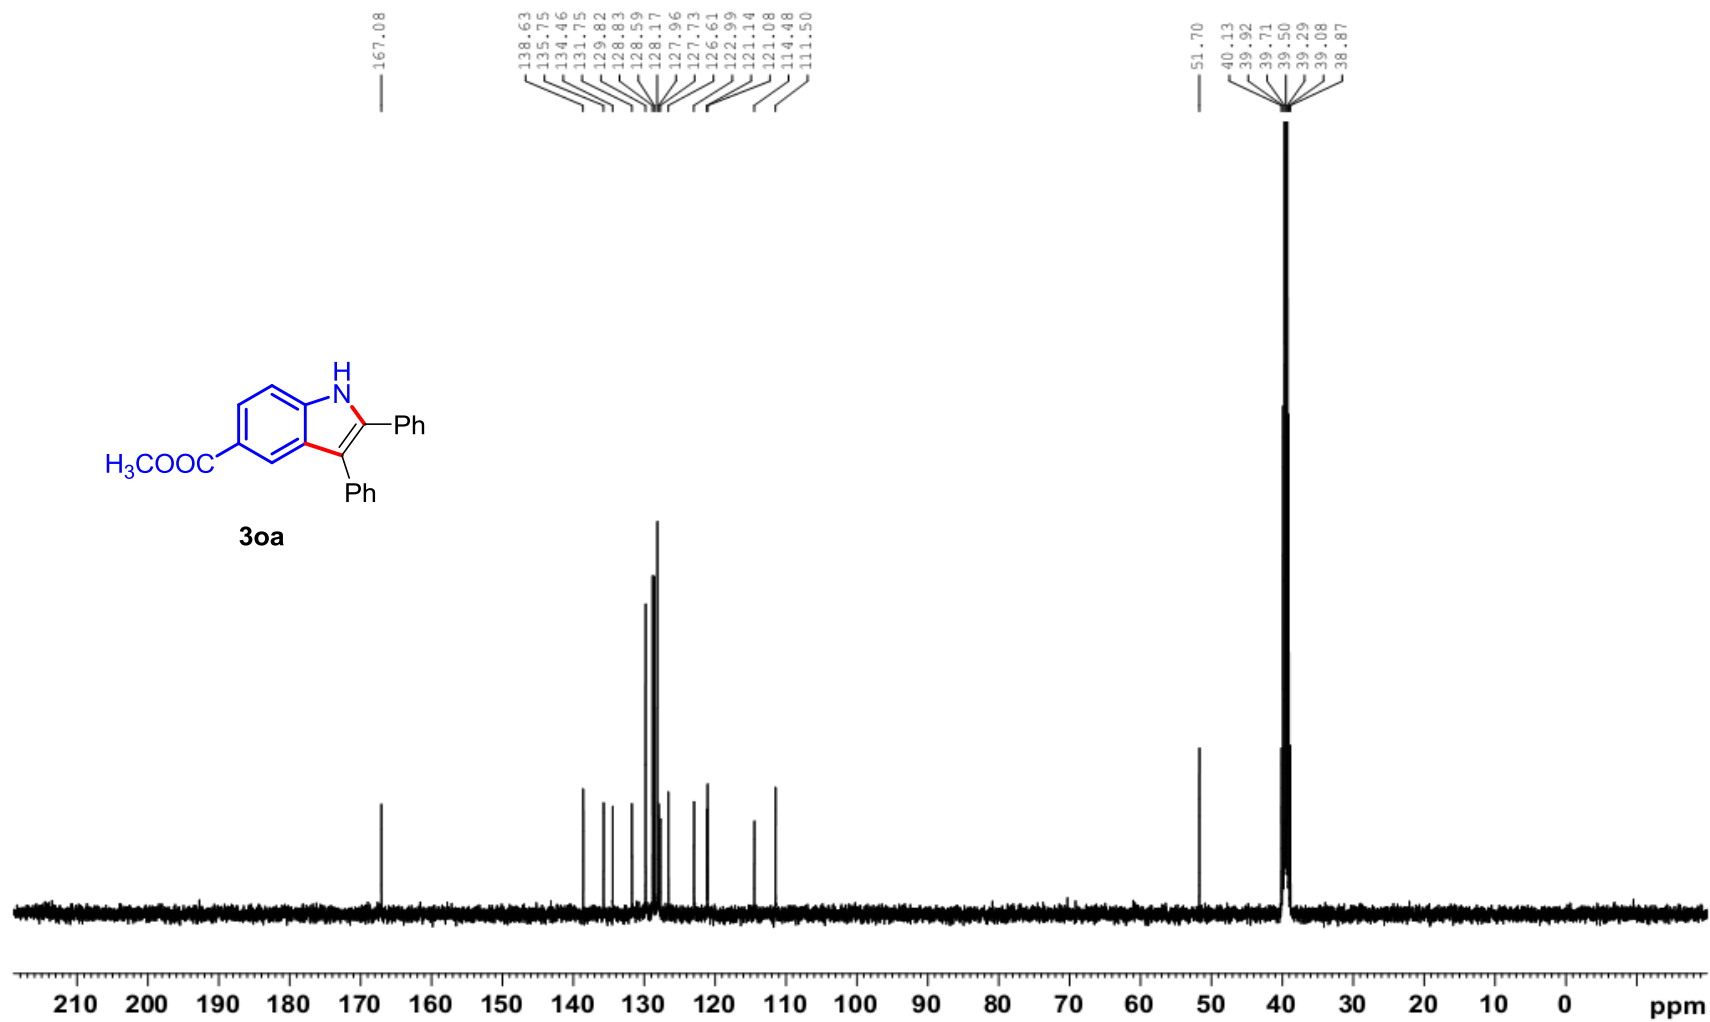

04-11-ZhangCY-HNMR

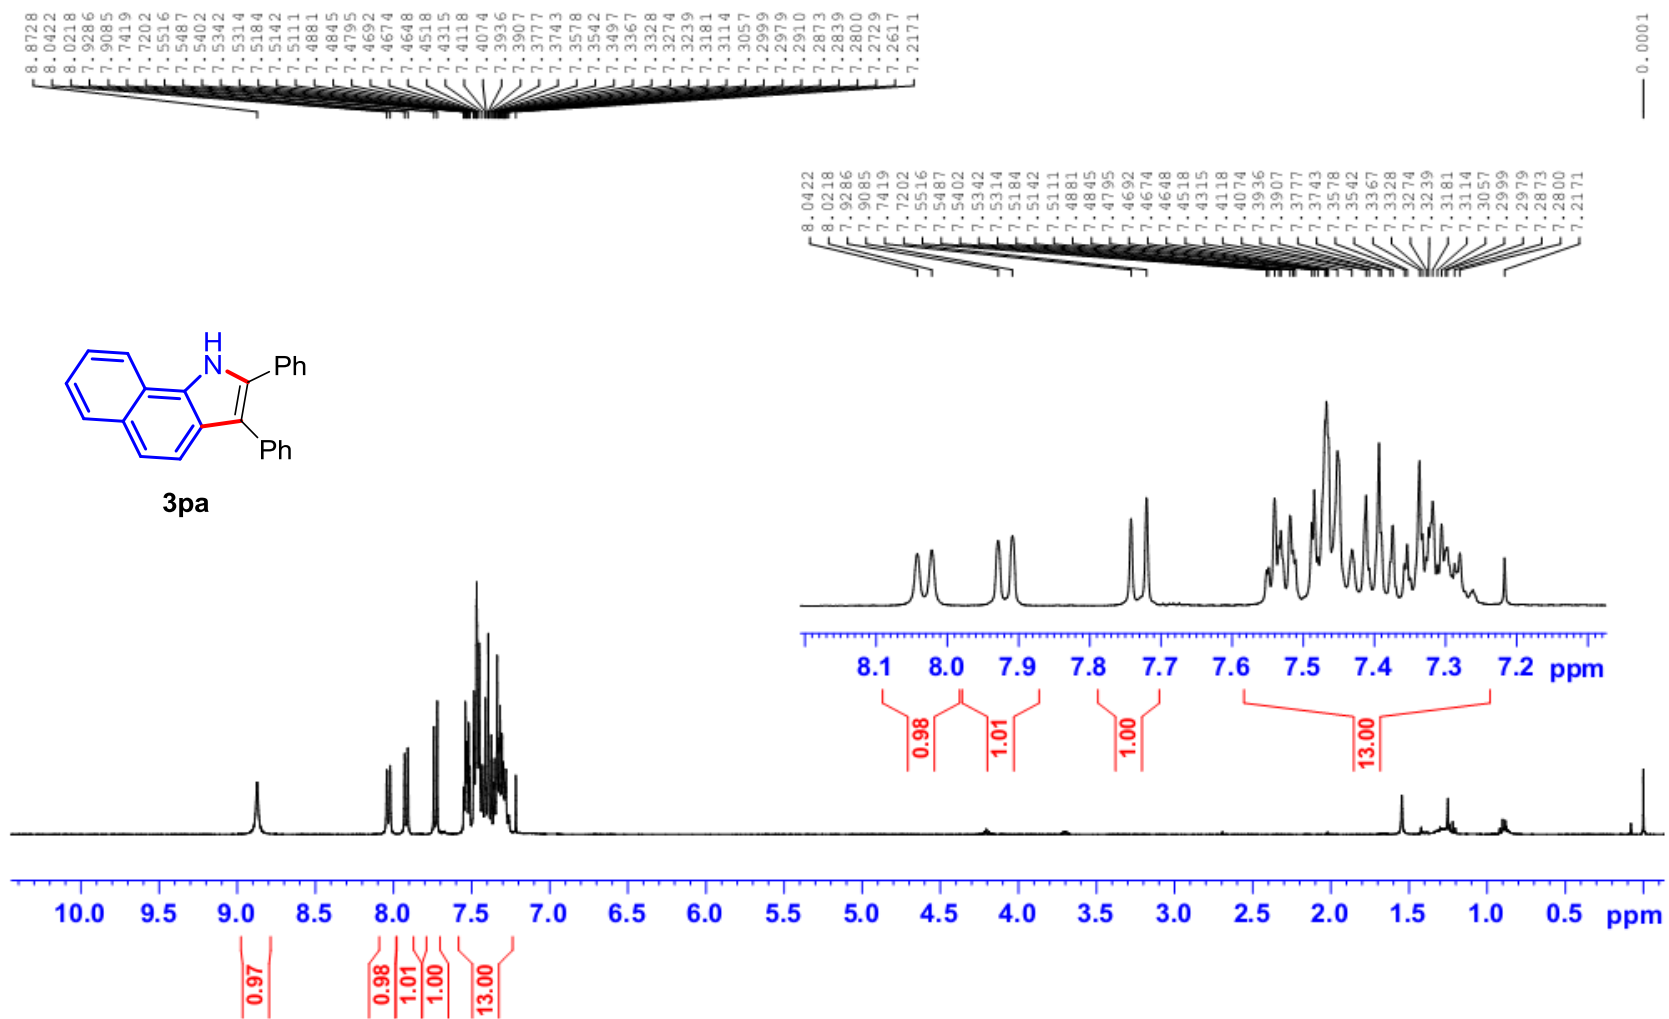

ZGY-130902-6-CNMR

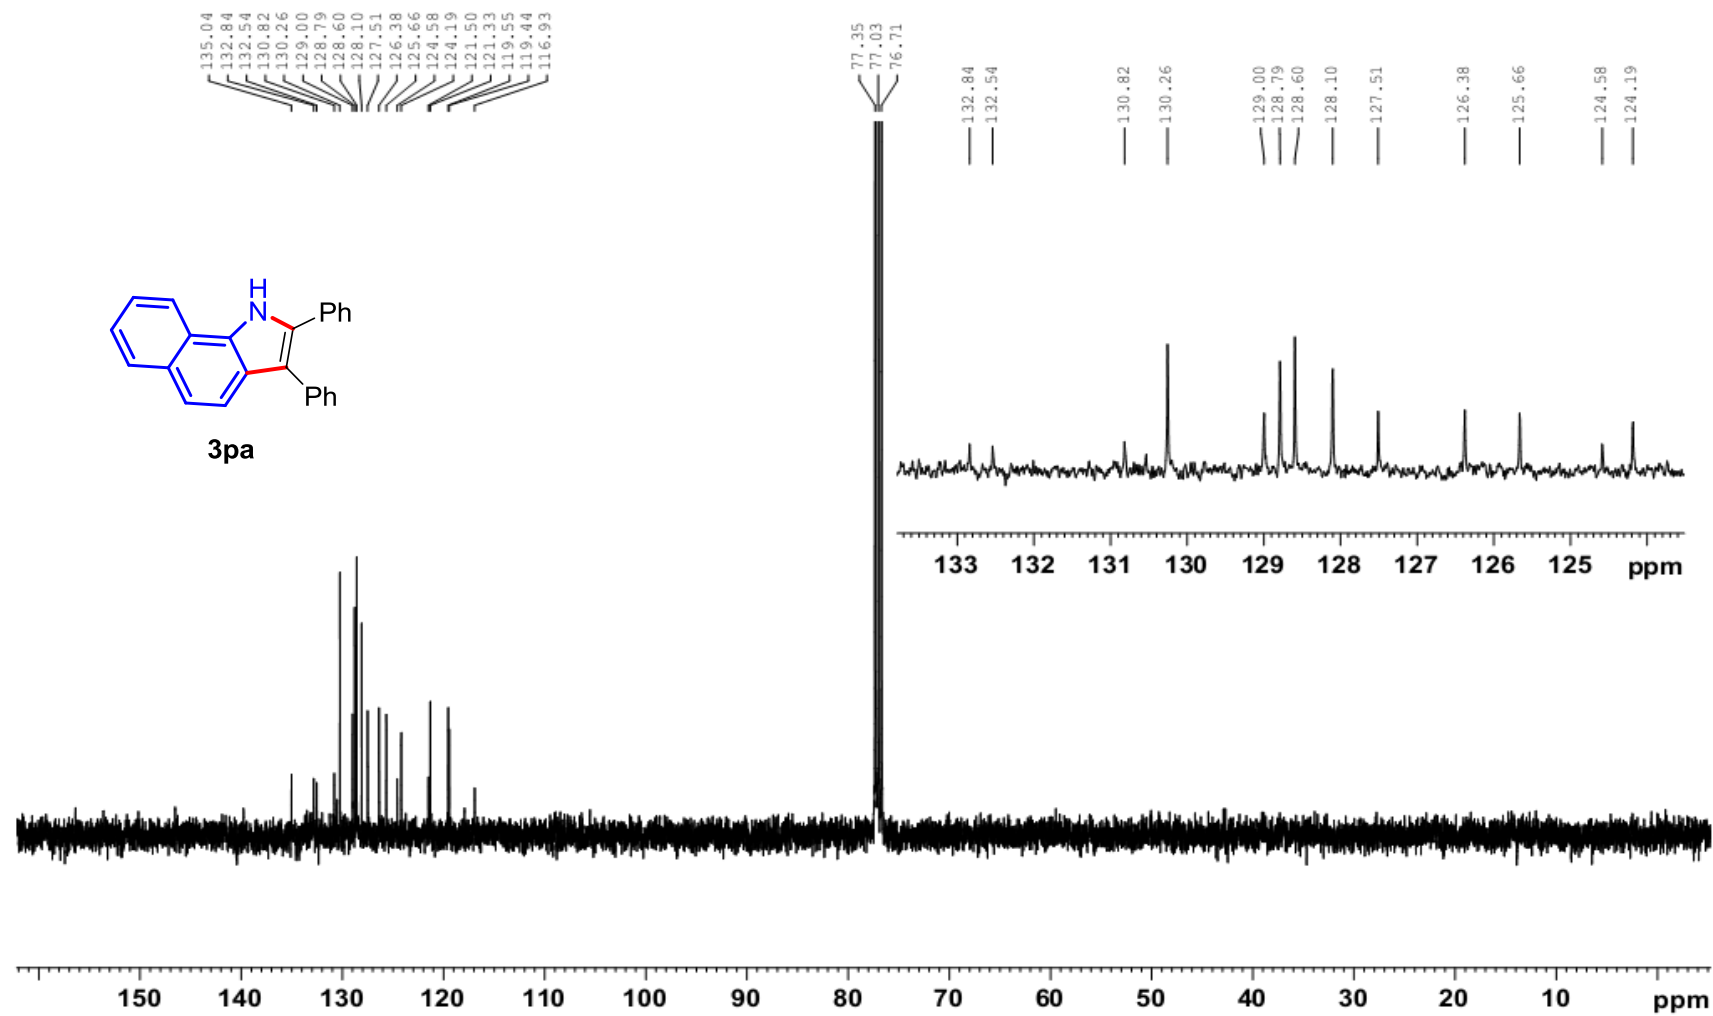

ZGY-131009-2-HNMR

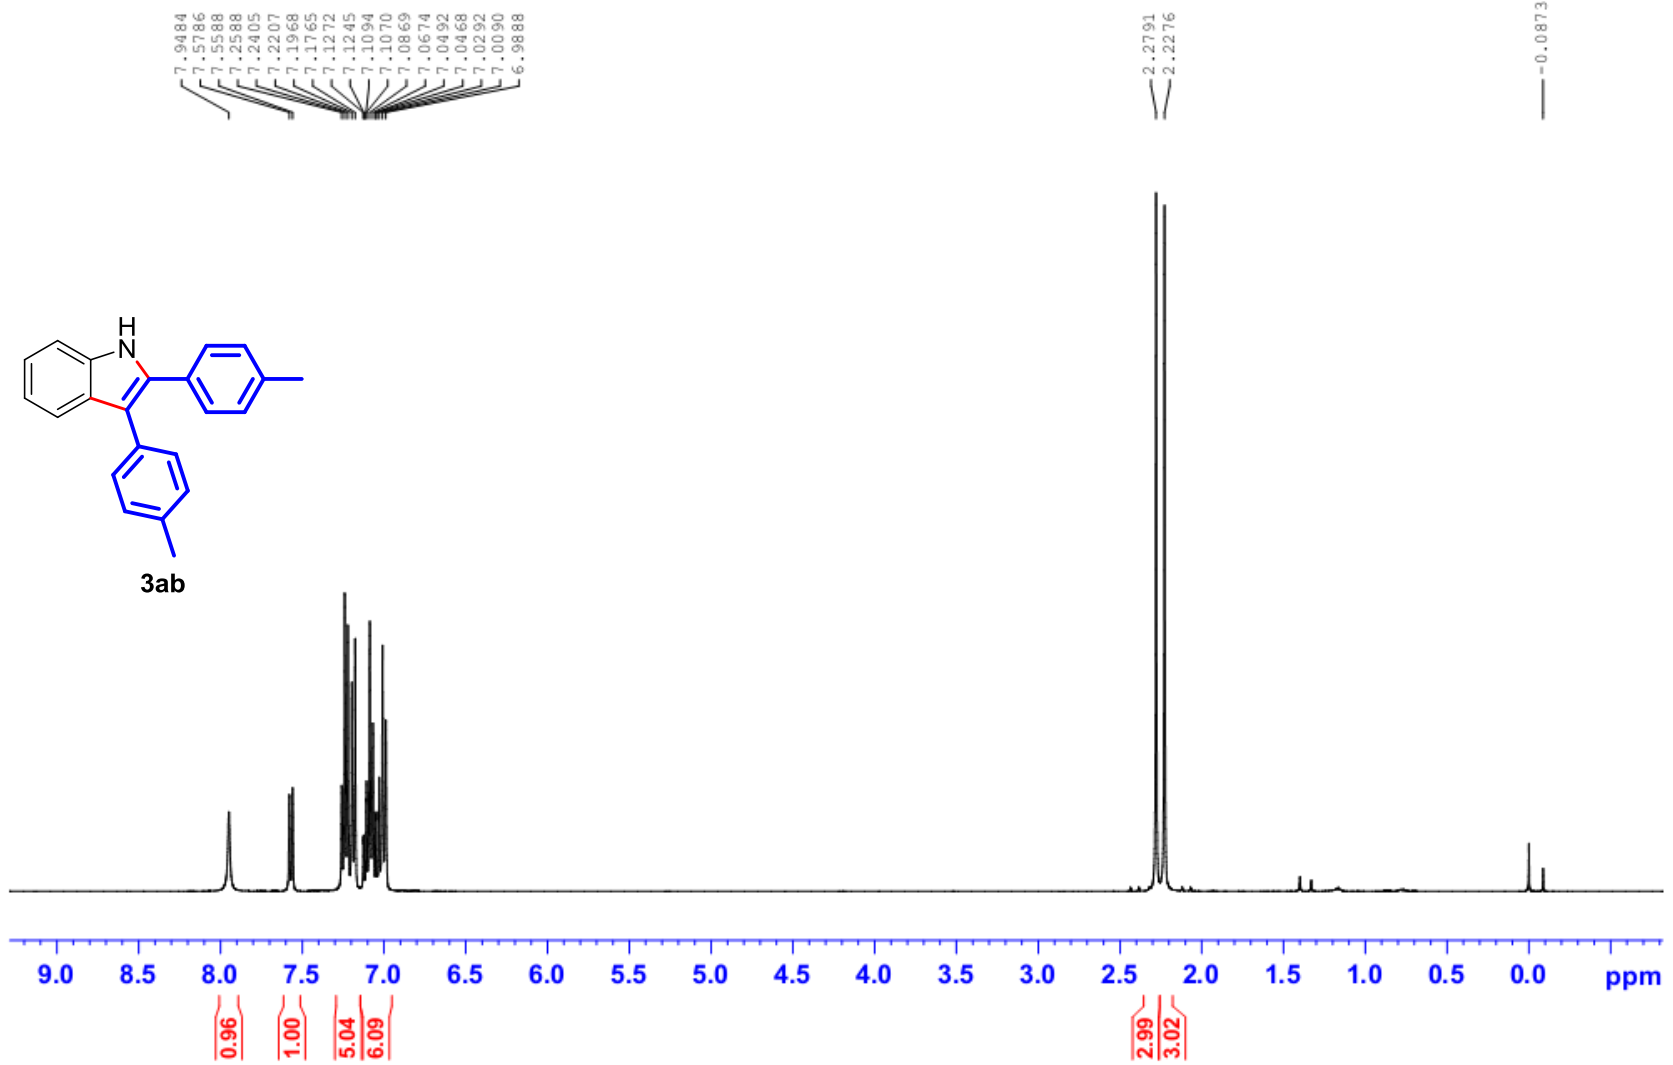

ZGY-130902-2-CNMR

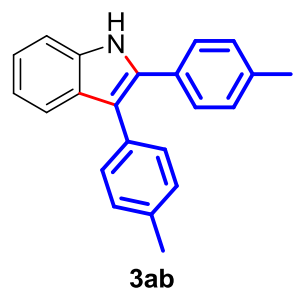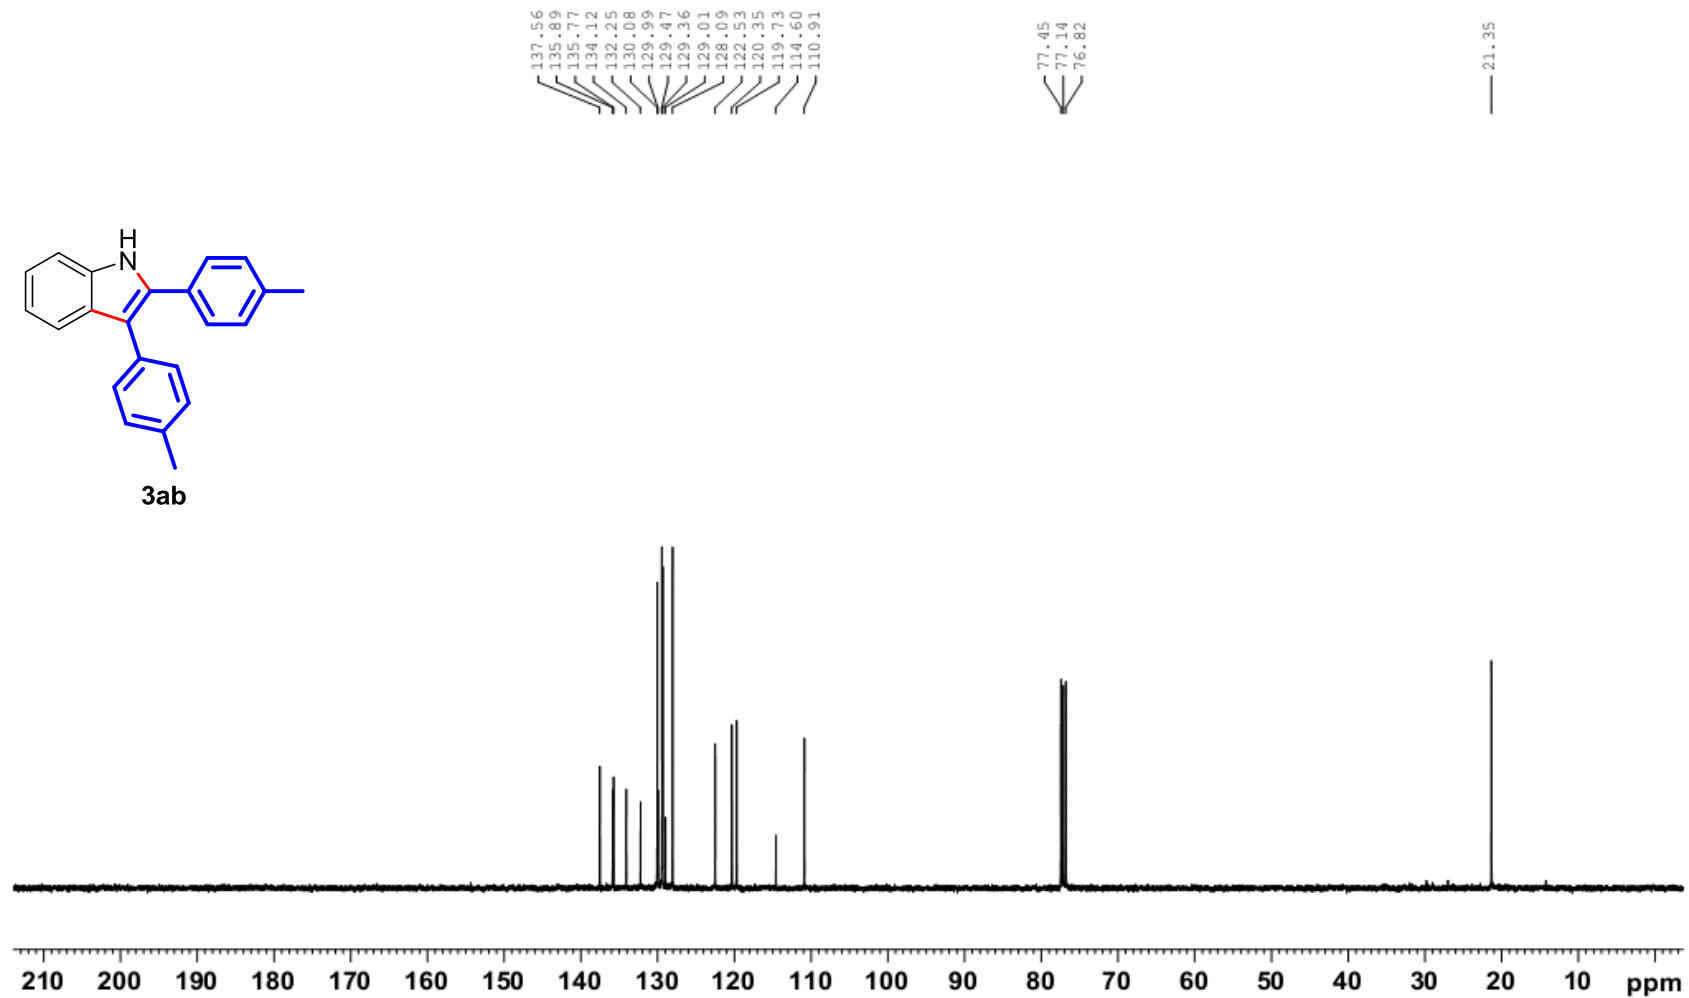

ZGY-131106-4-HNMR

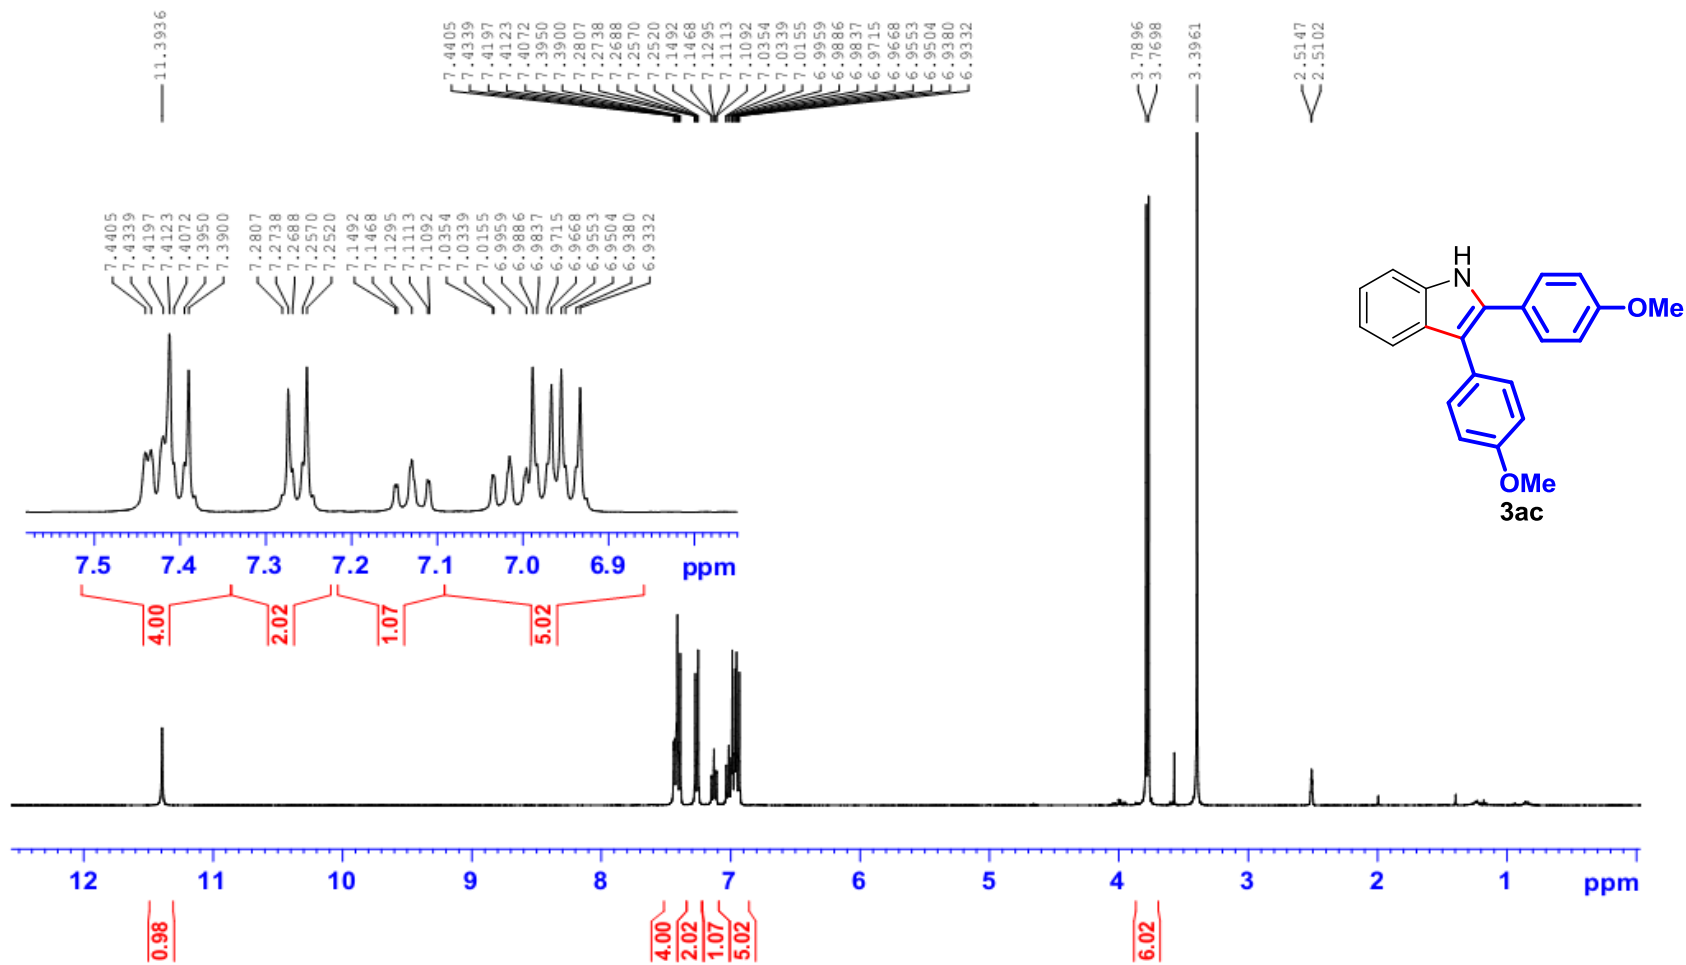

ZGY-130902-3-CNMR

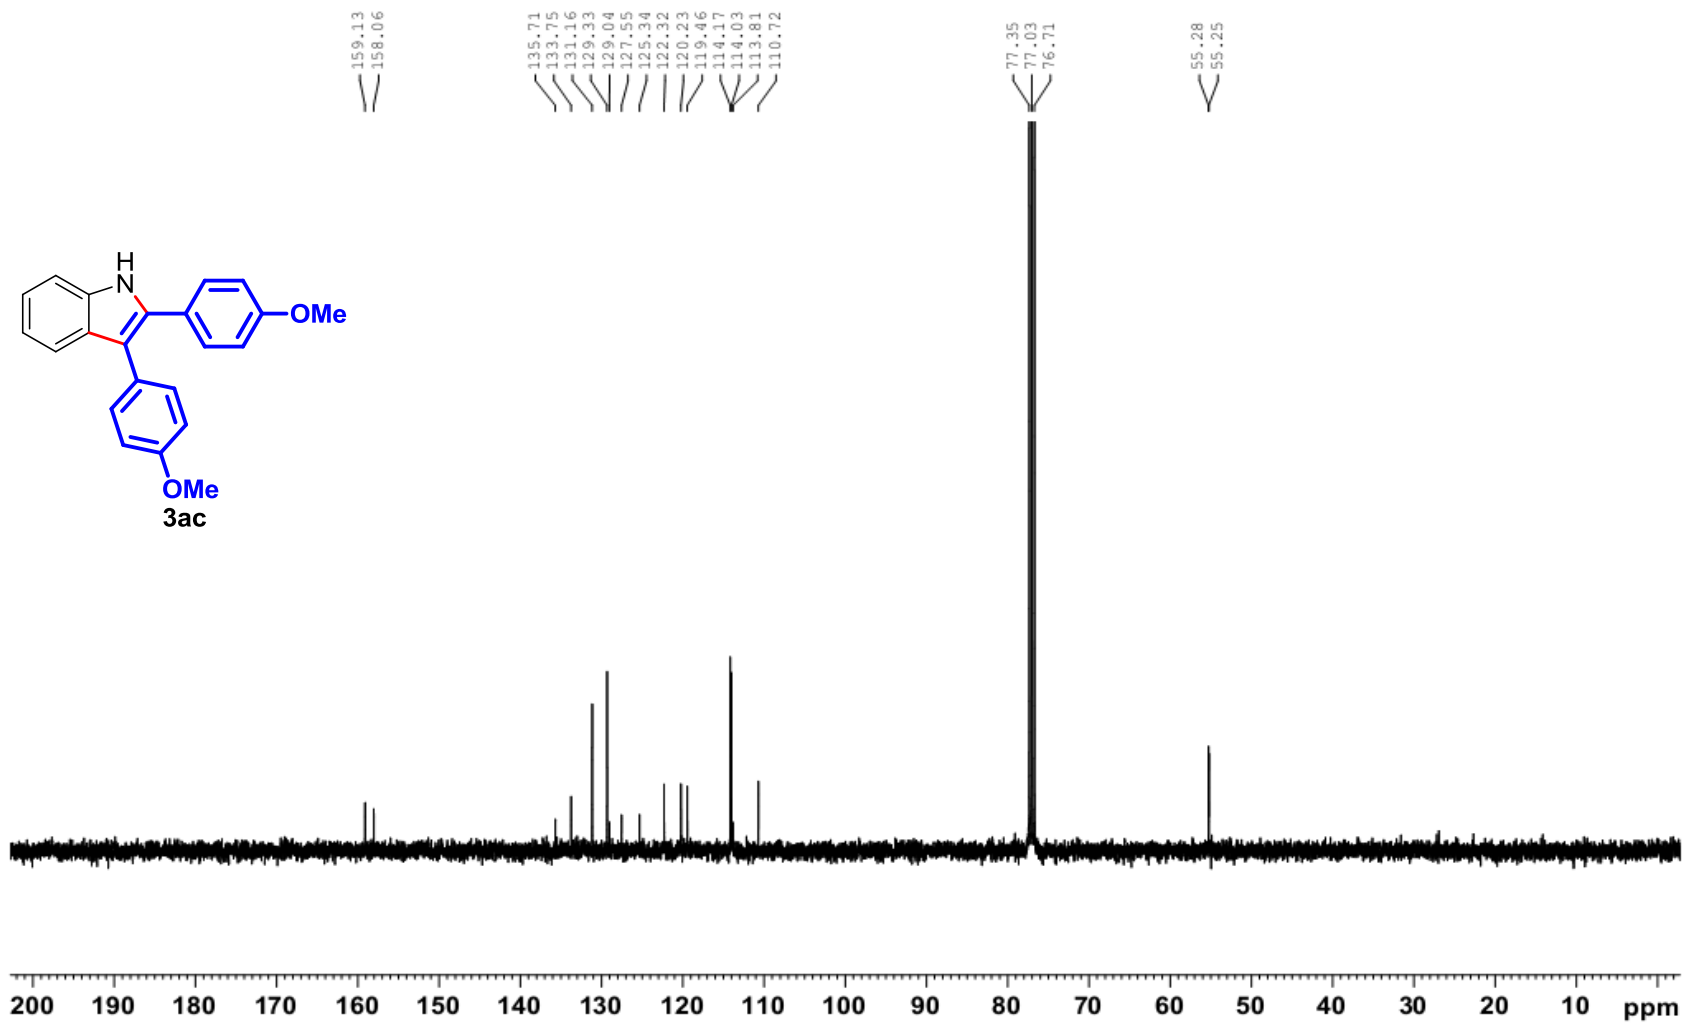

04-14-ZhangCY-HNMR

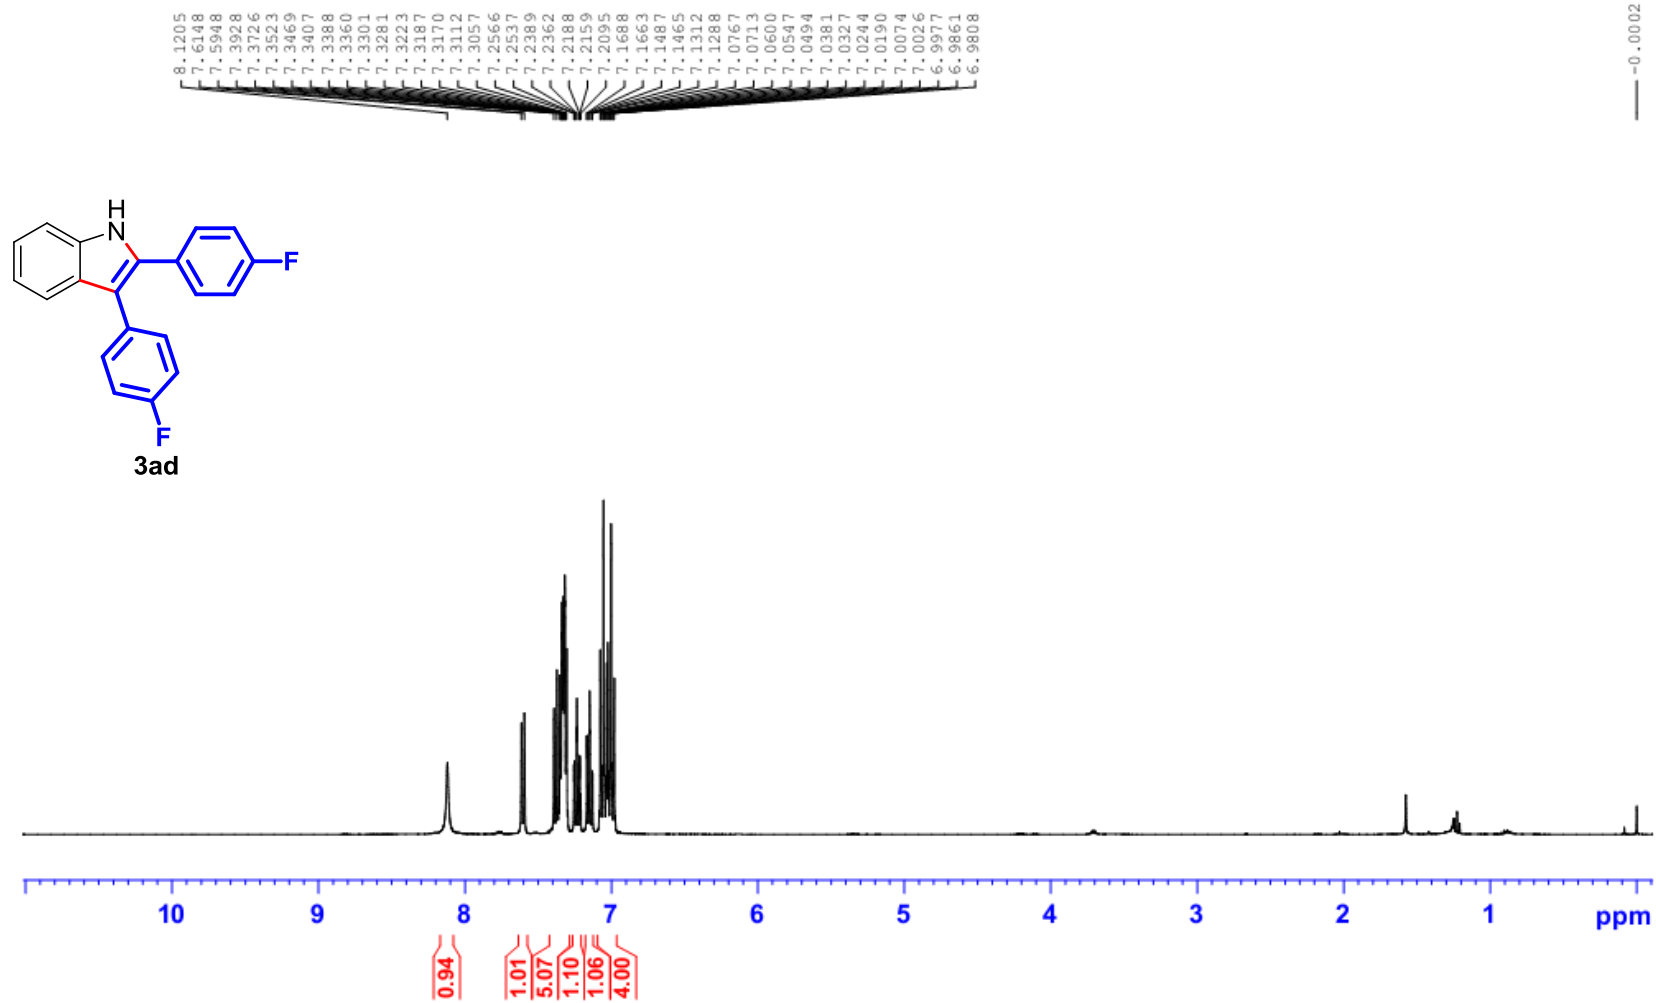



ZGY-130902-5-CNMR

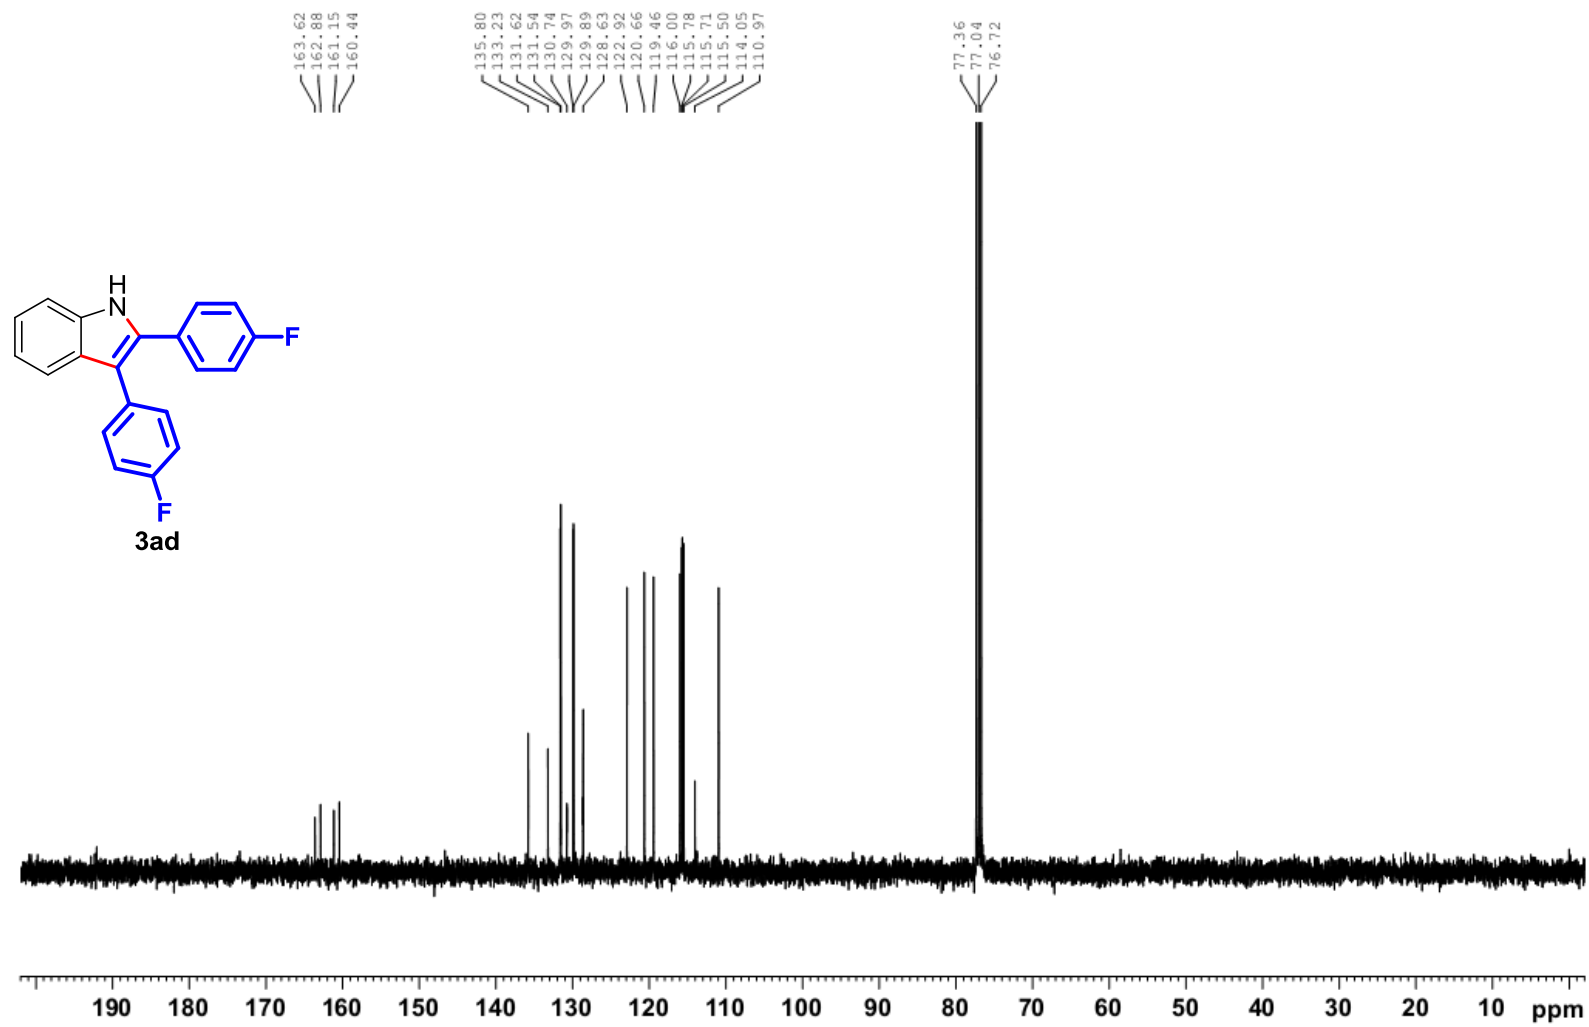

ZGY-130902-5-FNMR

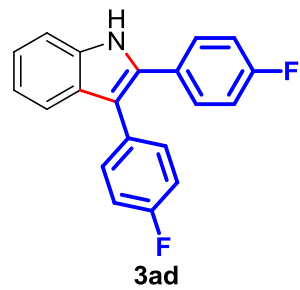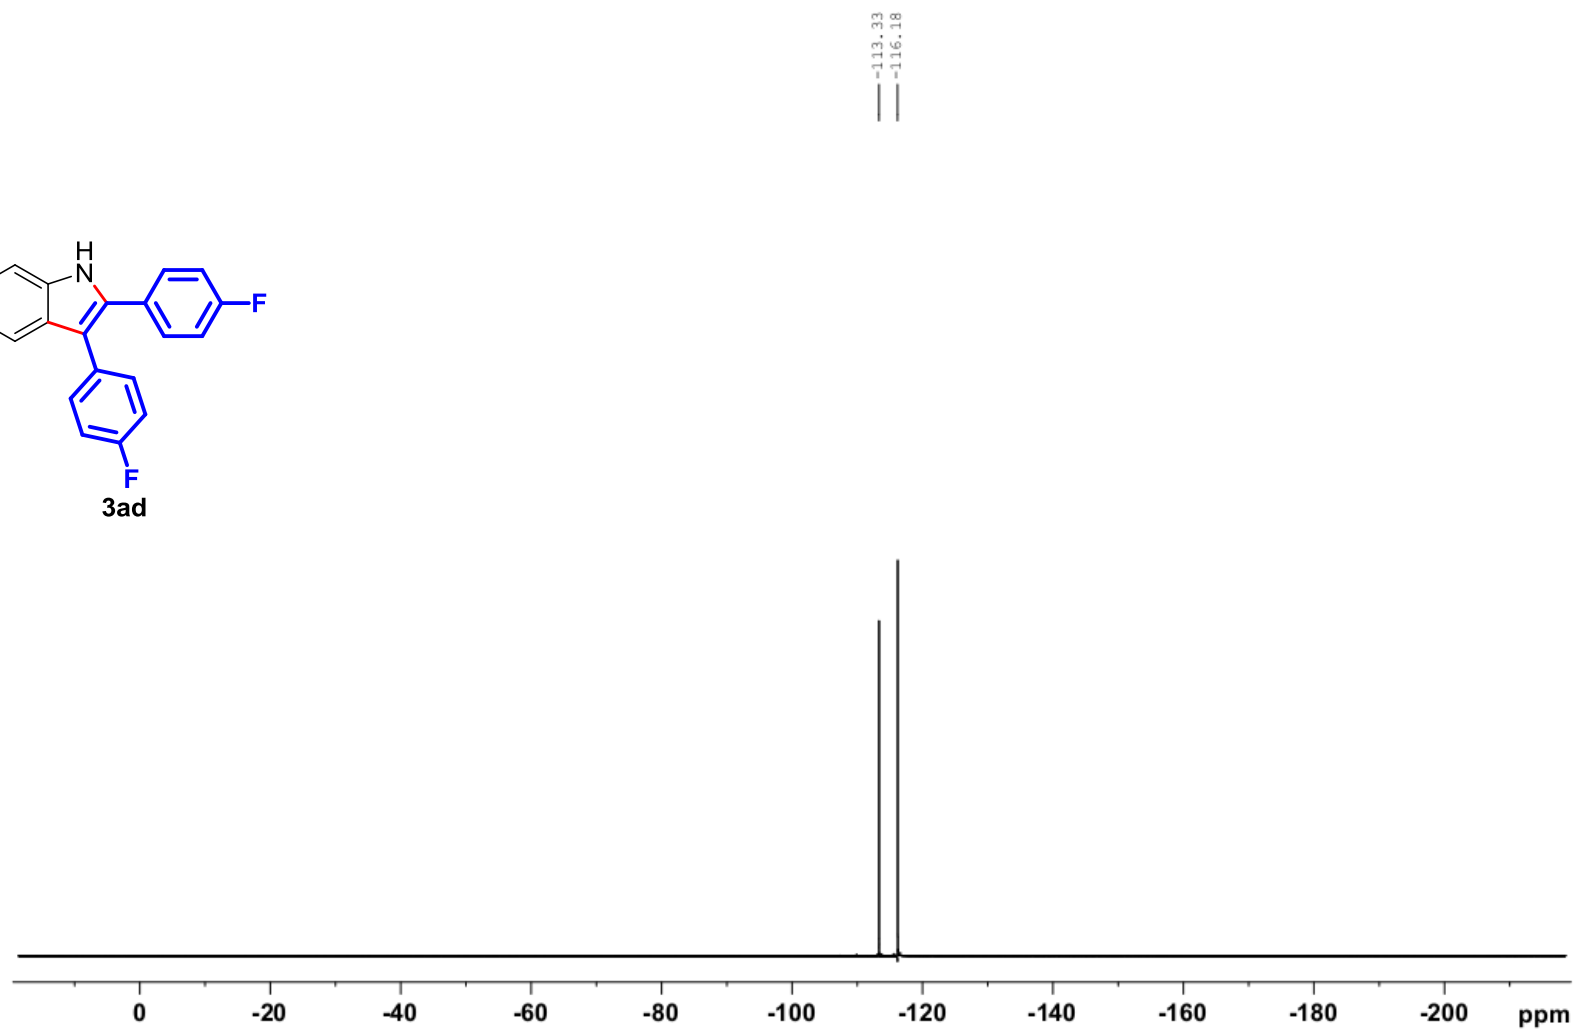

ZGY-130902-4-HNMR

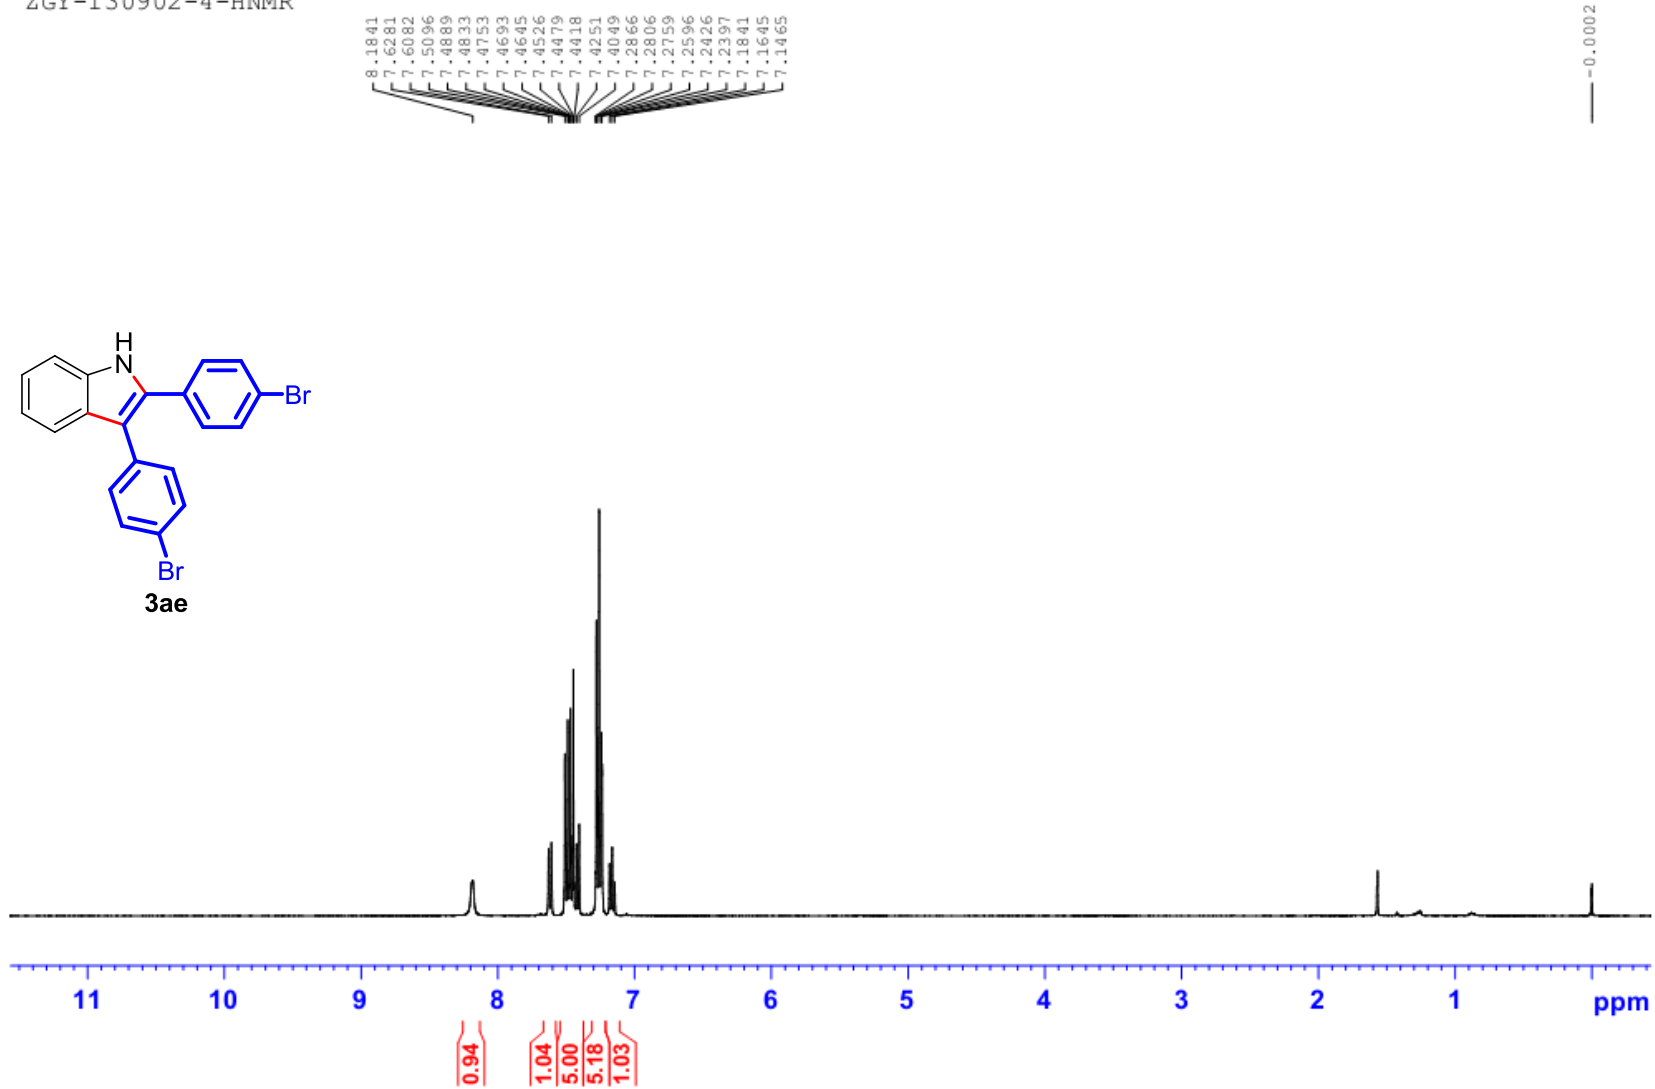

ZGY-130902-4-CNMR

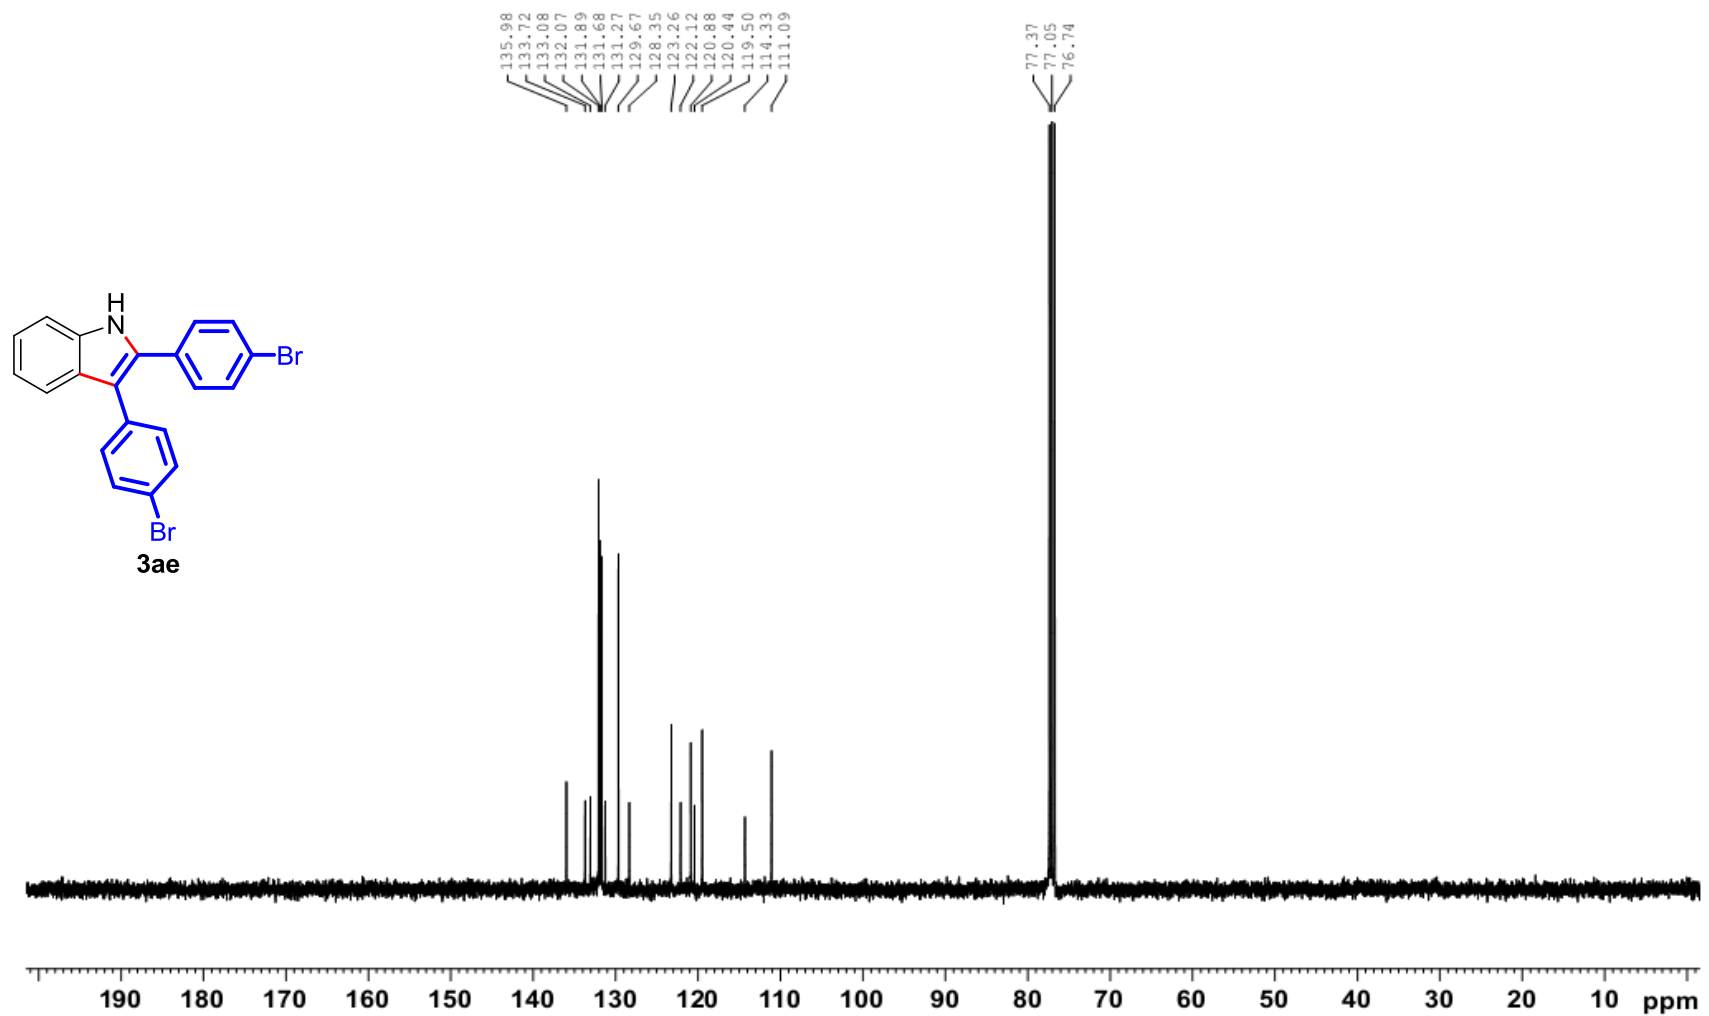

04-10-ZhangCY-HNMR

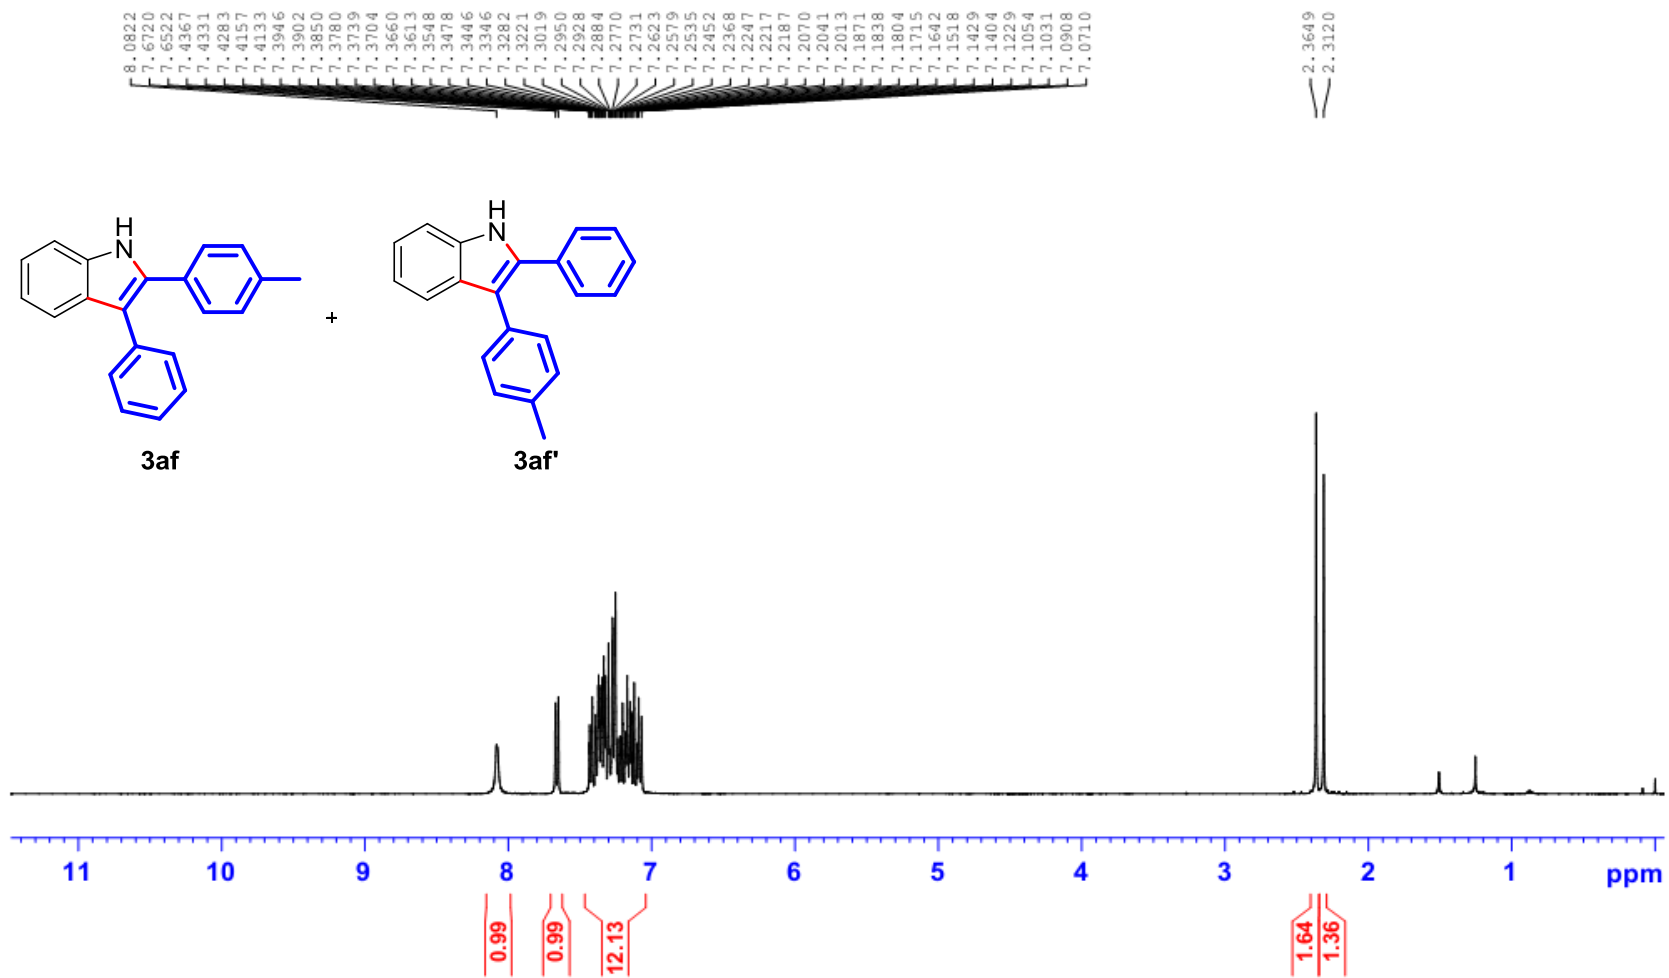

ZGY-130902-10-CNMR

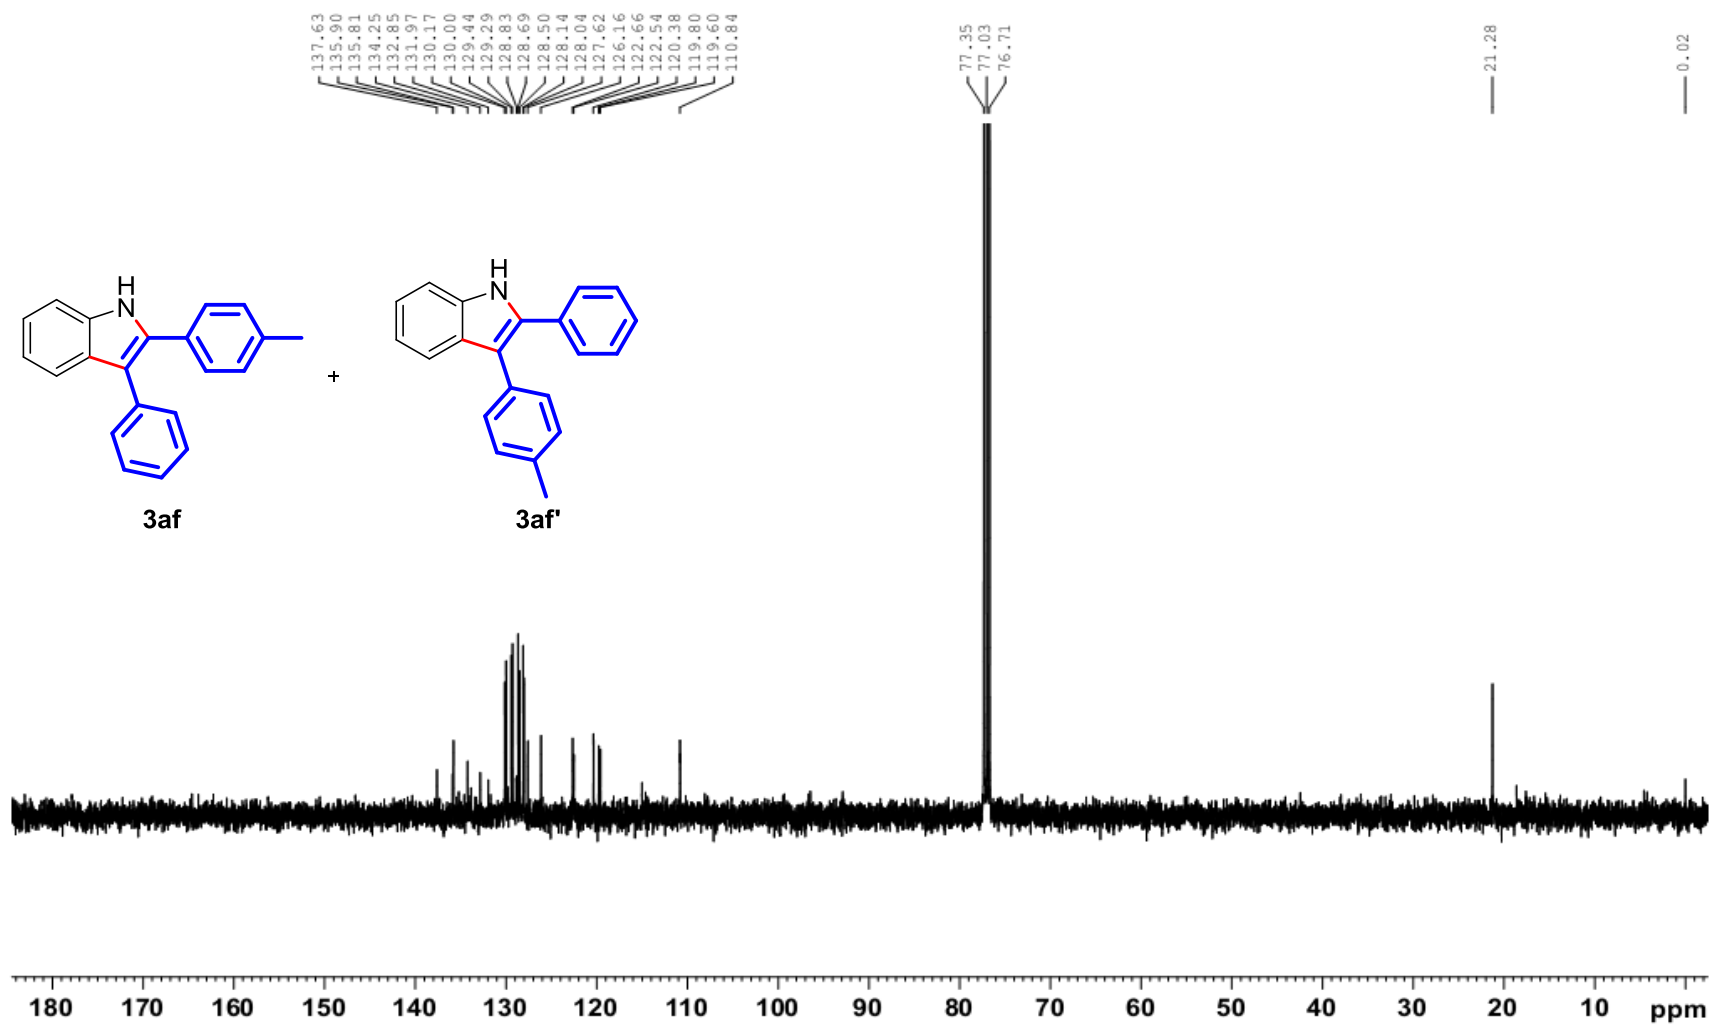

ZGY-130902-11-HNMR

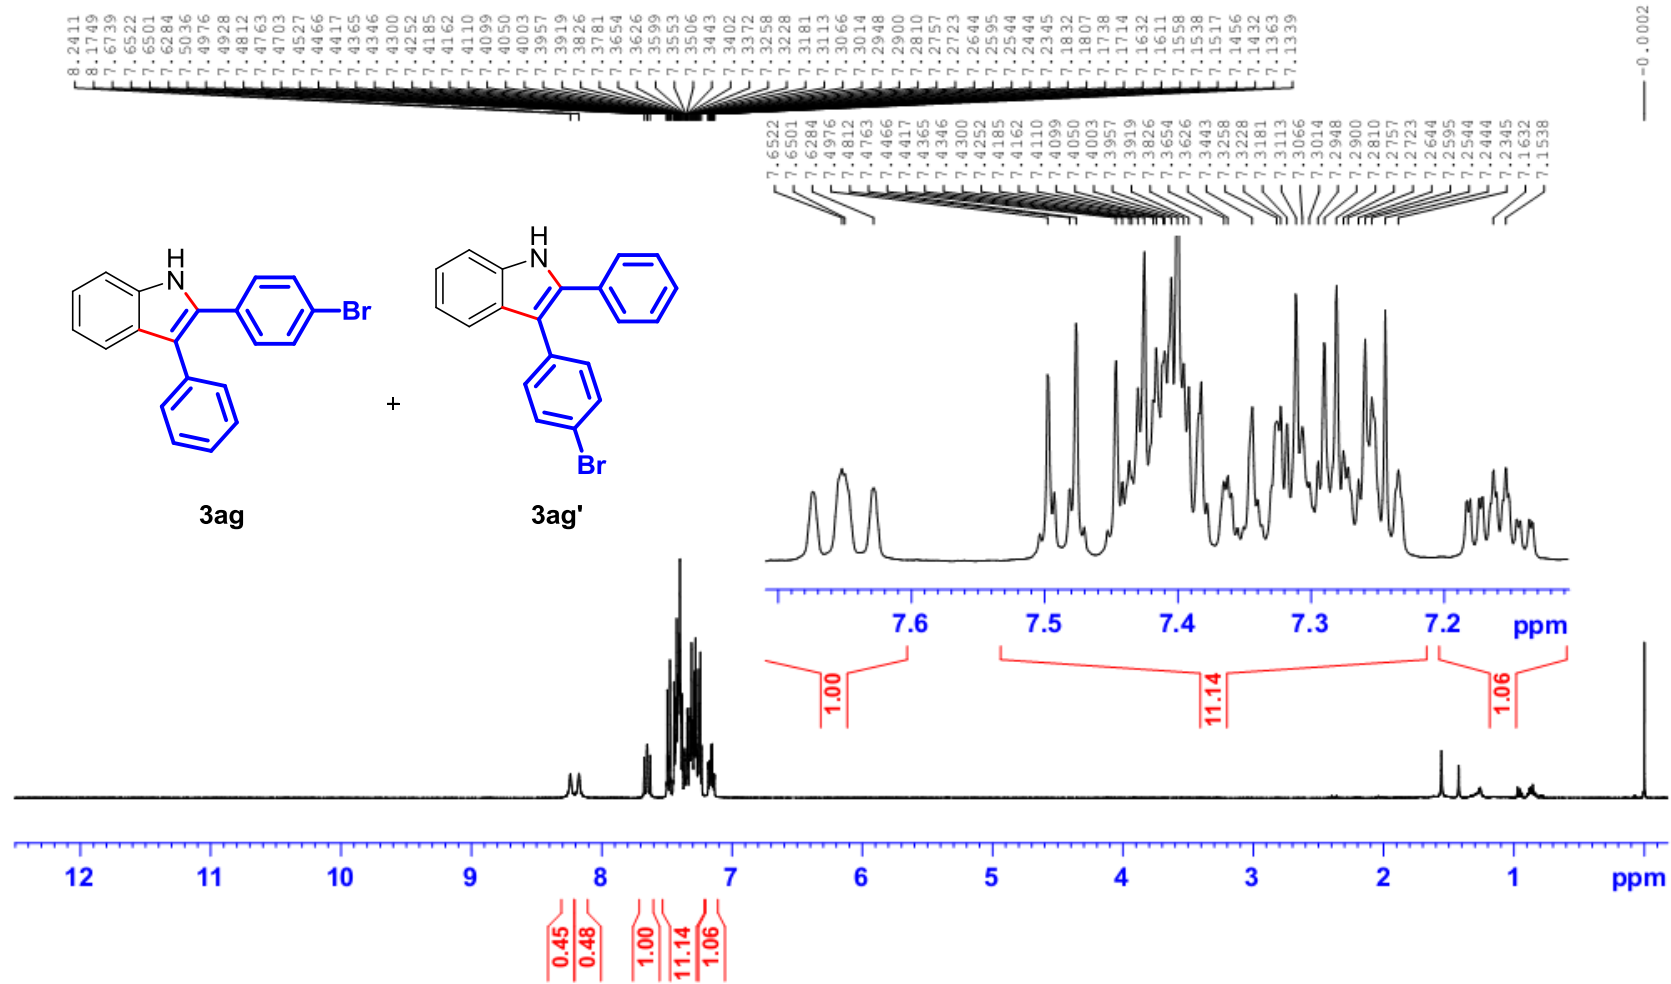

ZGY-130902-11-CNMR

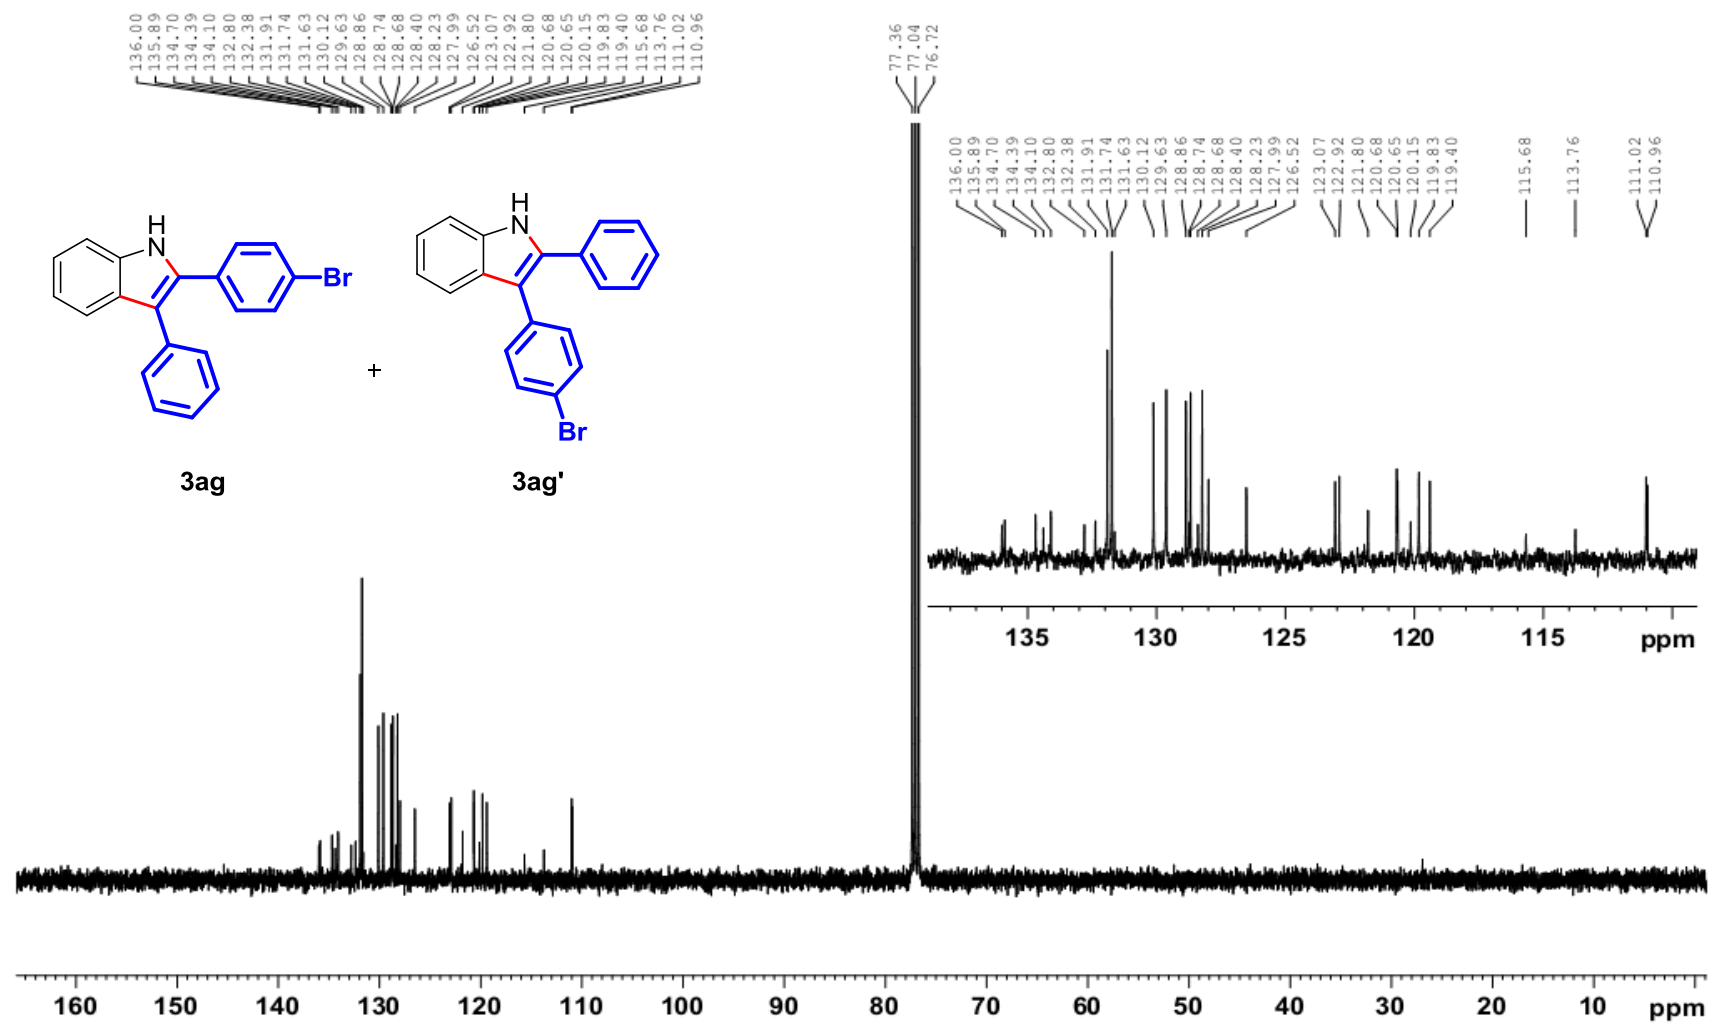



ZGY-130909-2-HNMR

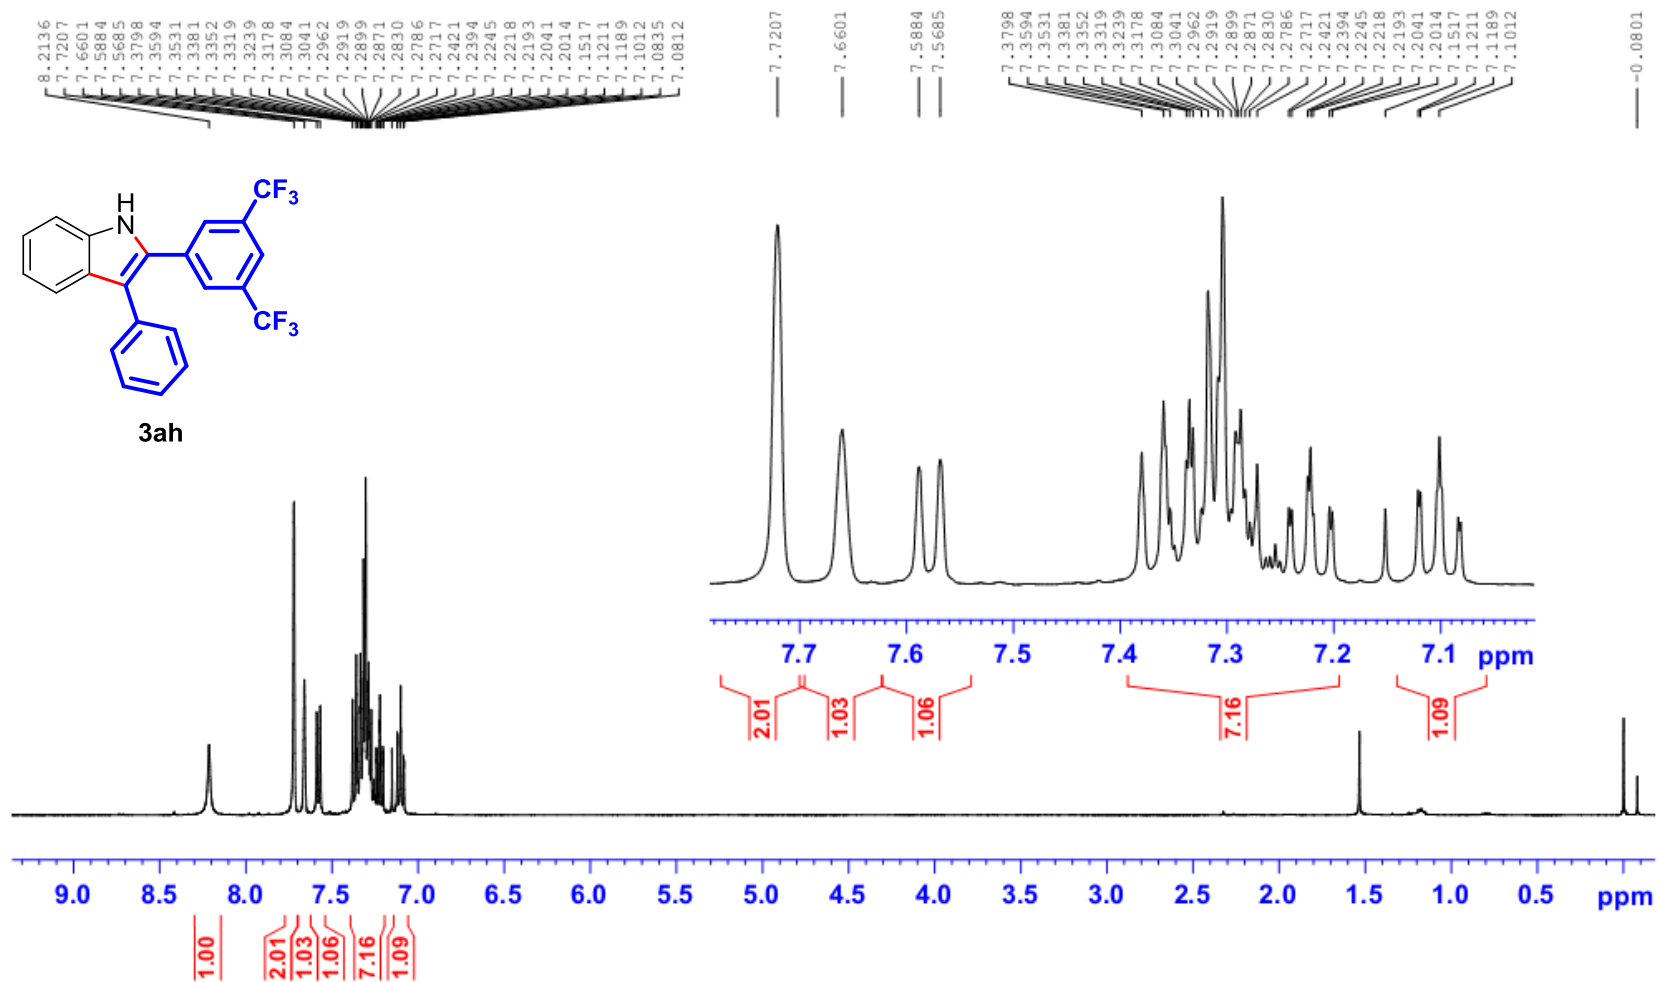

ZGY-130909-2-CNMR

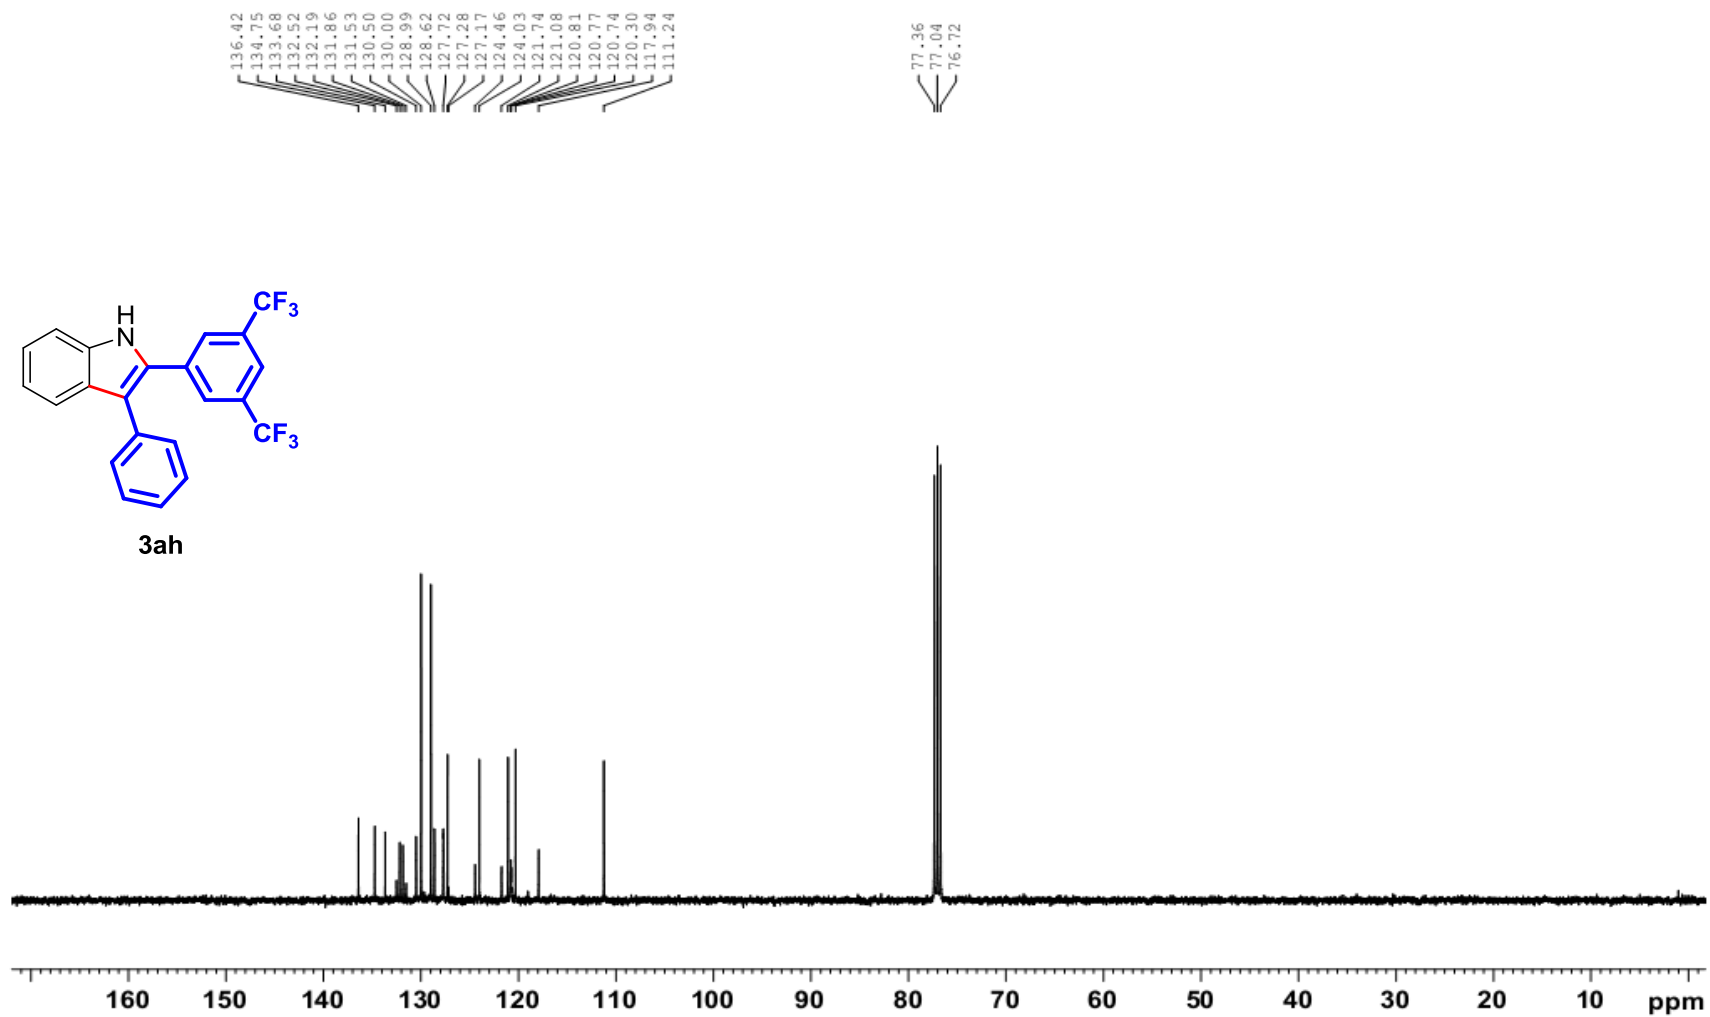

ZGY-130909-2-FNMR

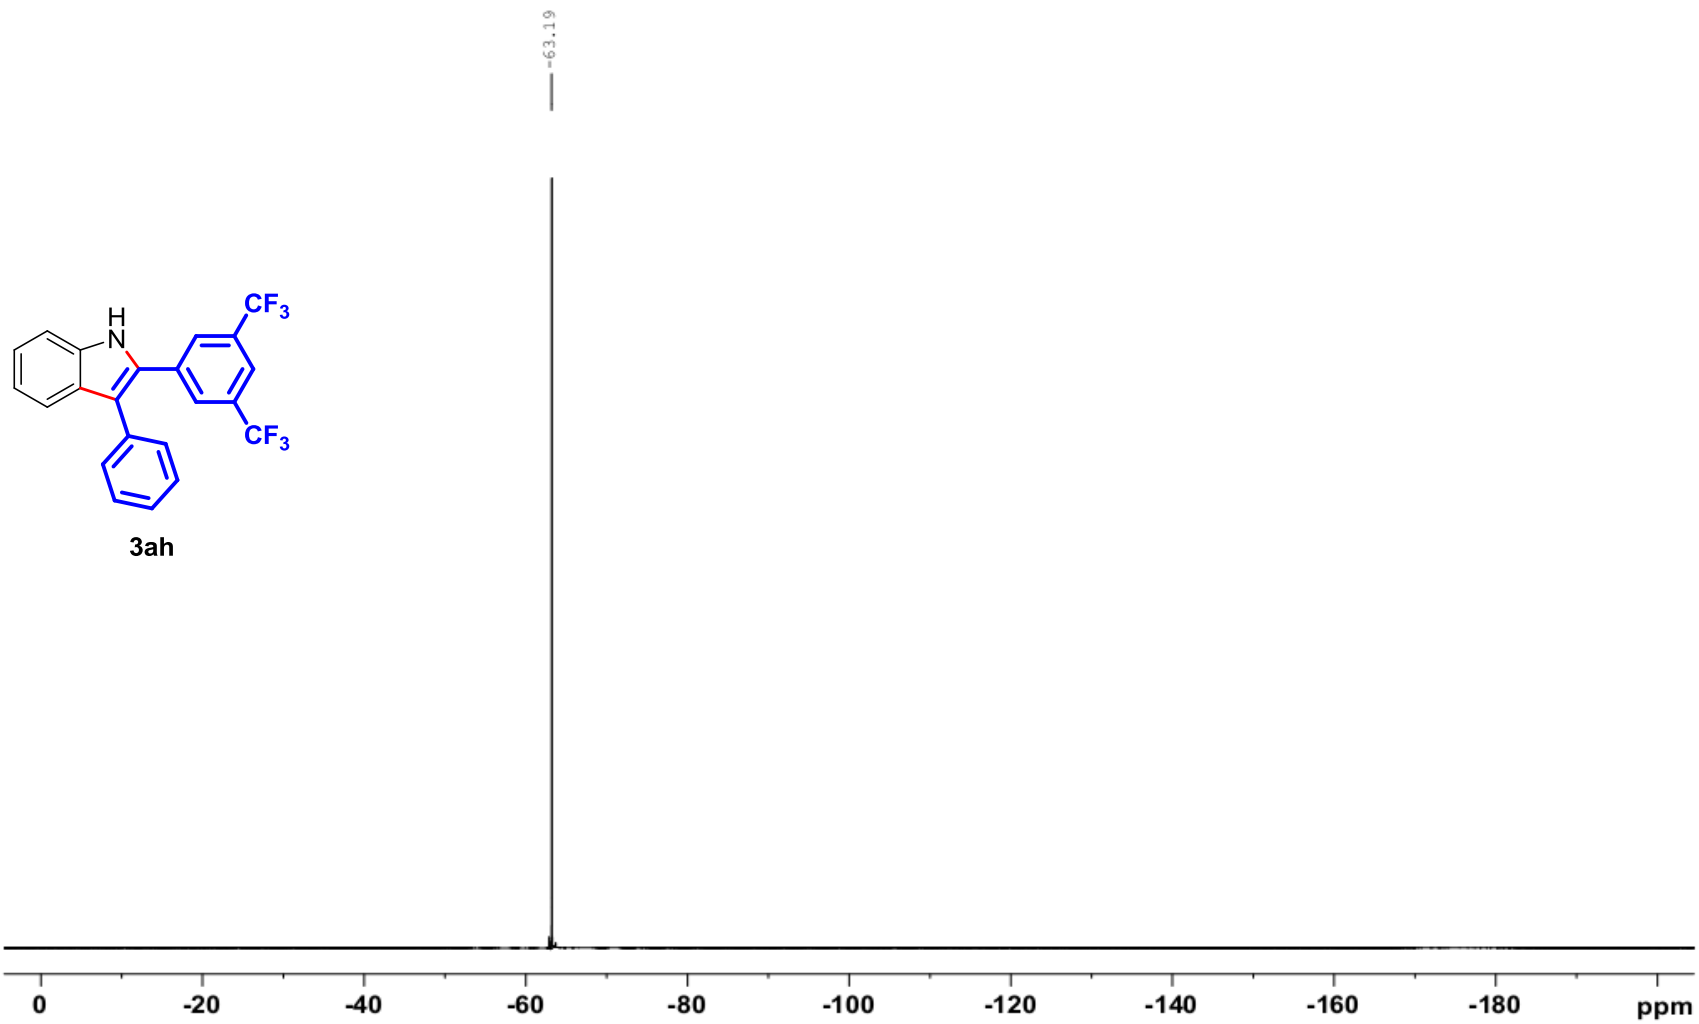

ZGY-131106-3-HNMR

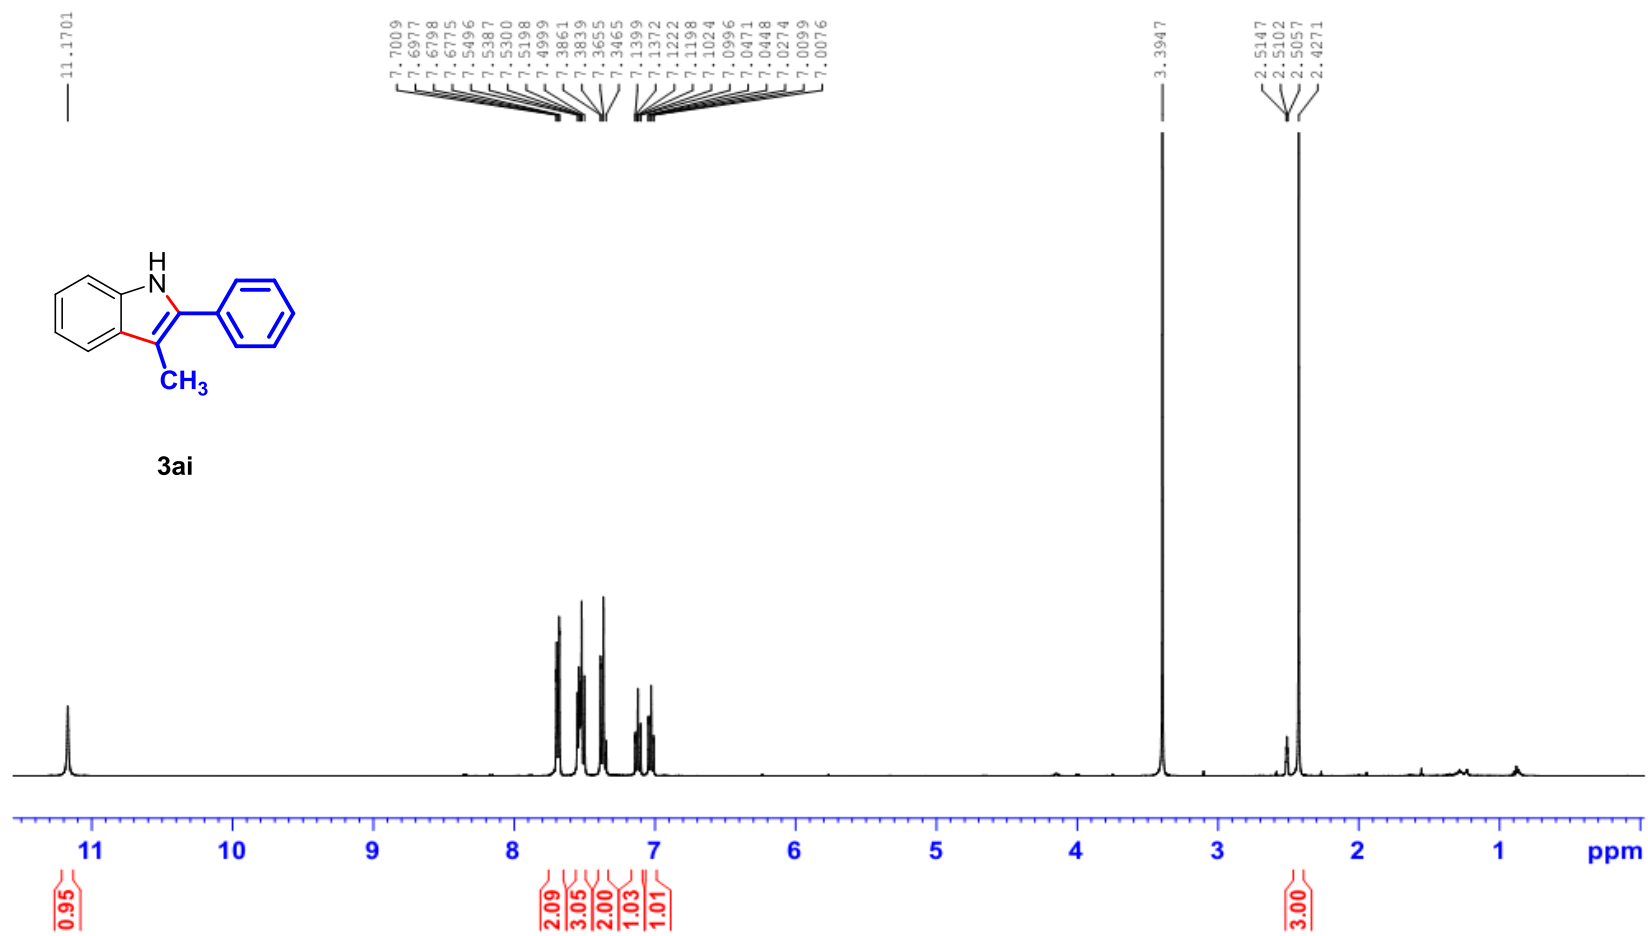

ZGY-131106-3-CNMR

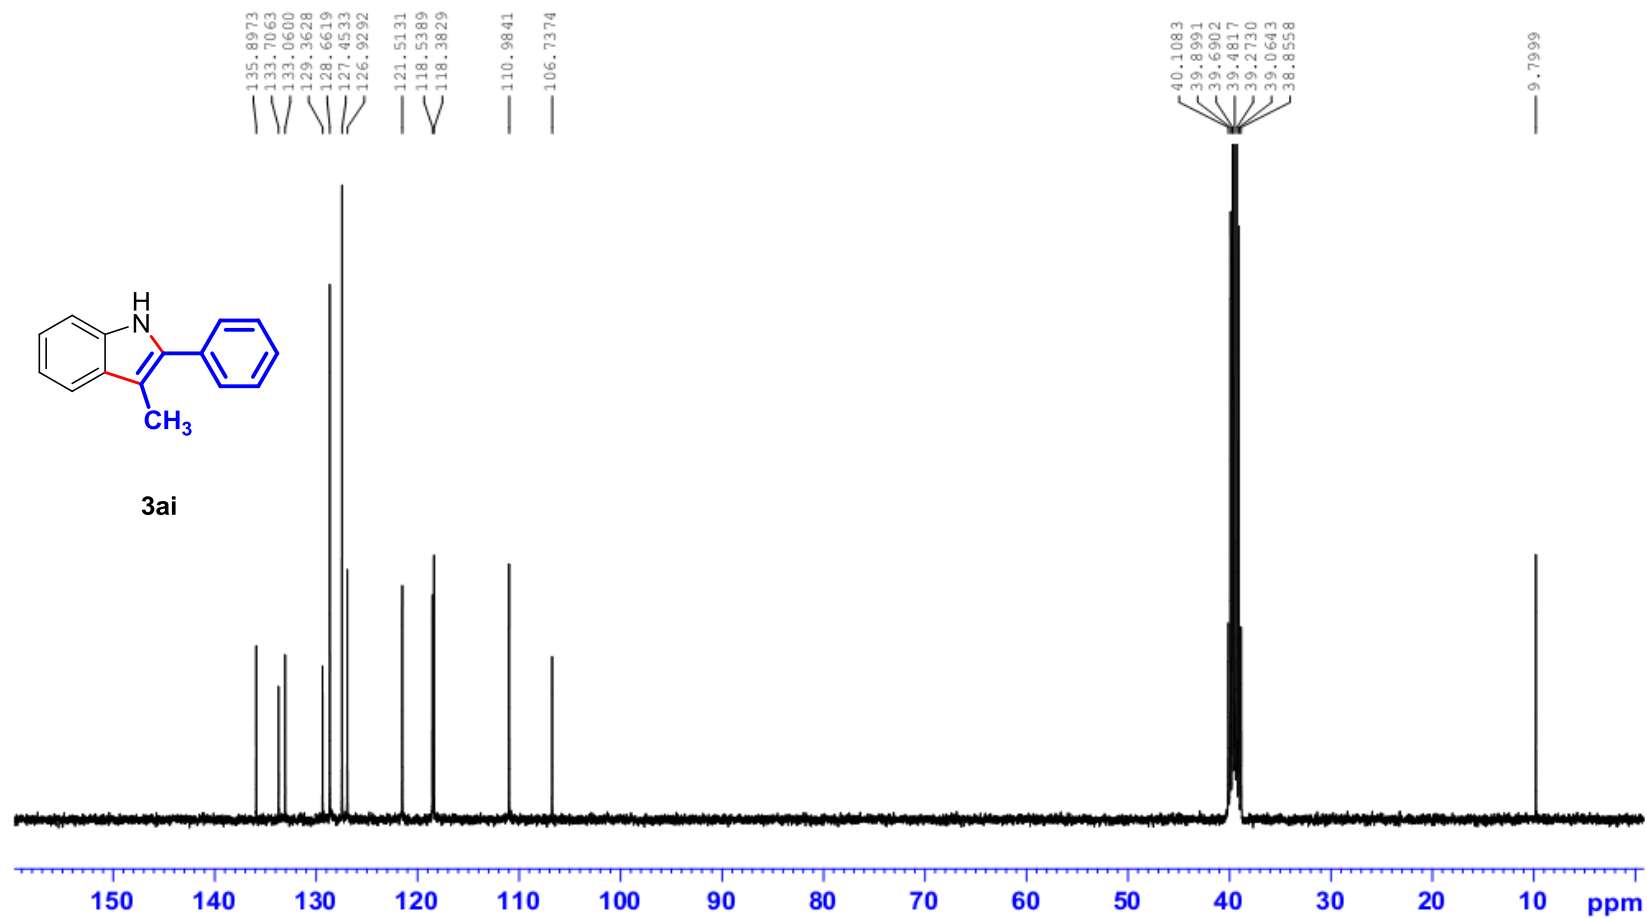

ZGY-131106-5-HNMR

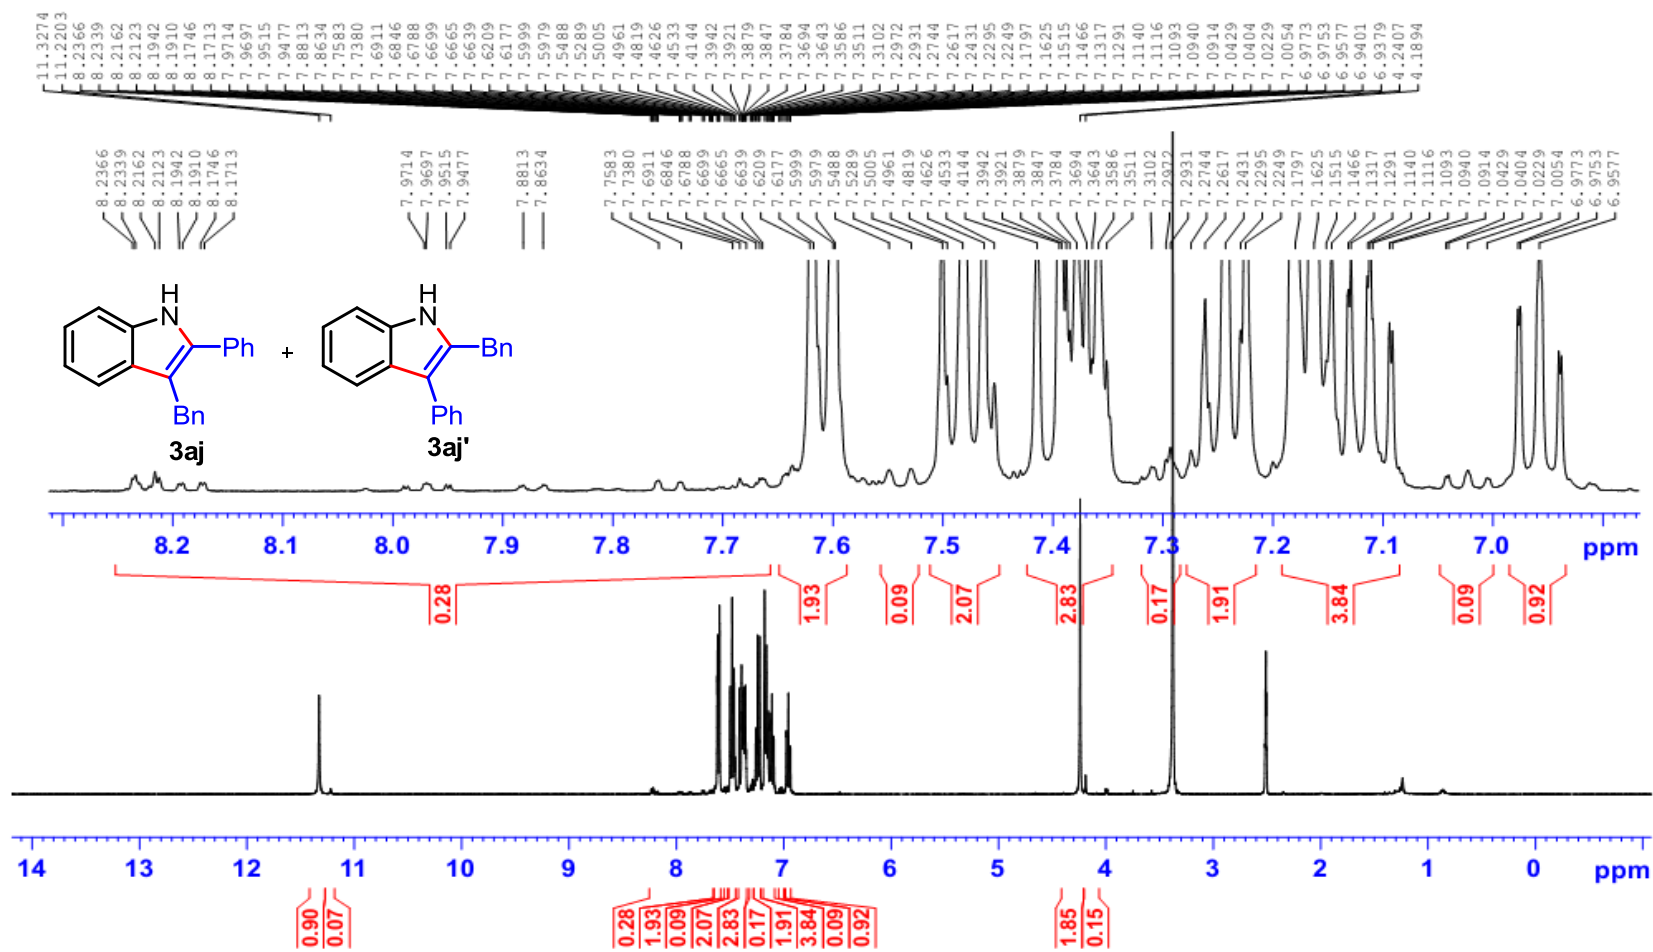

ZGY-131106-5-CNMR

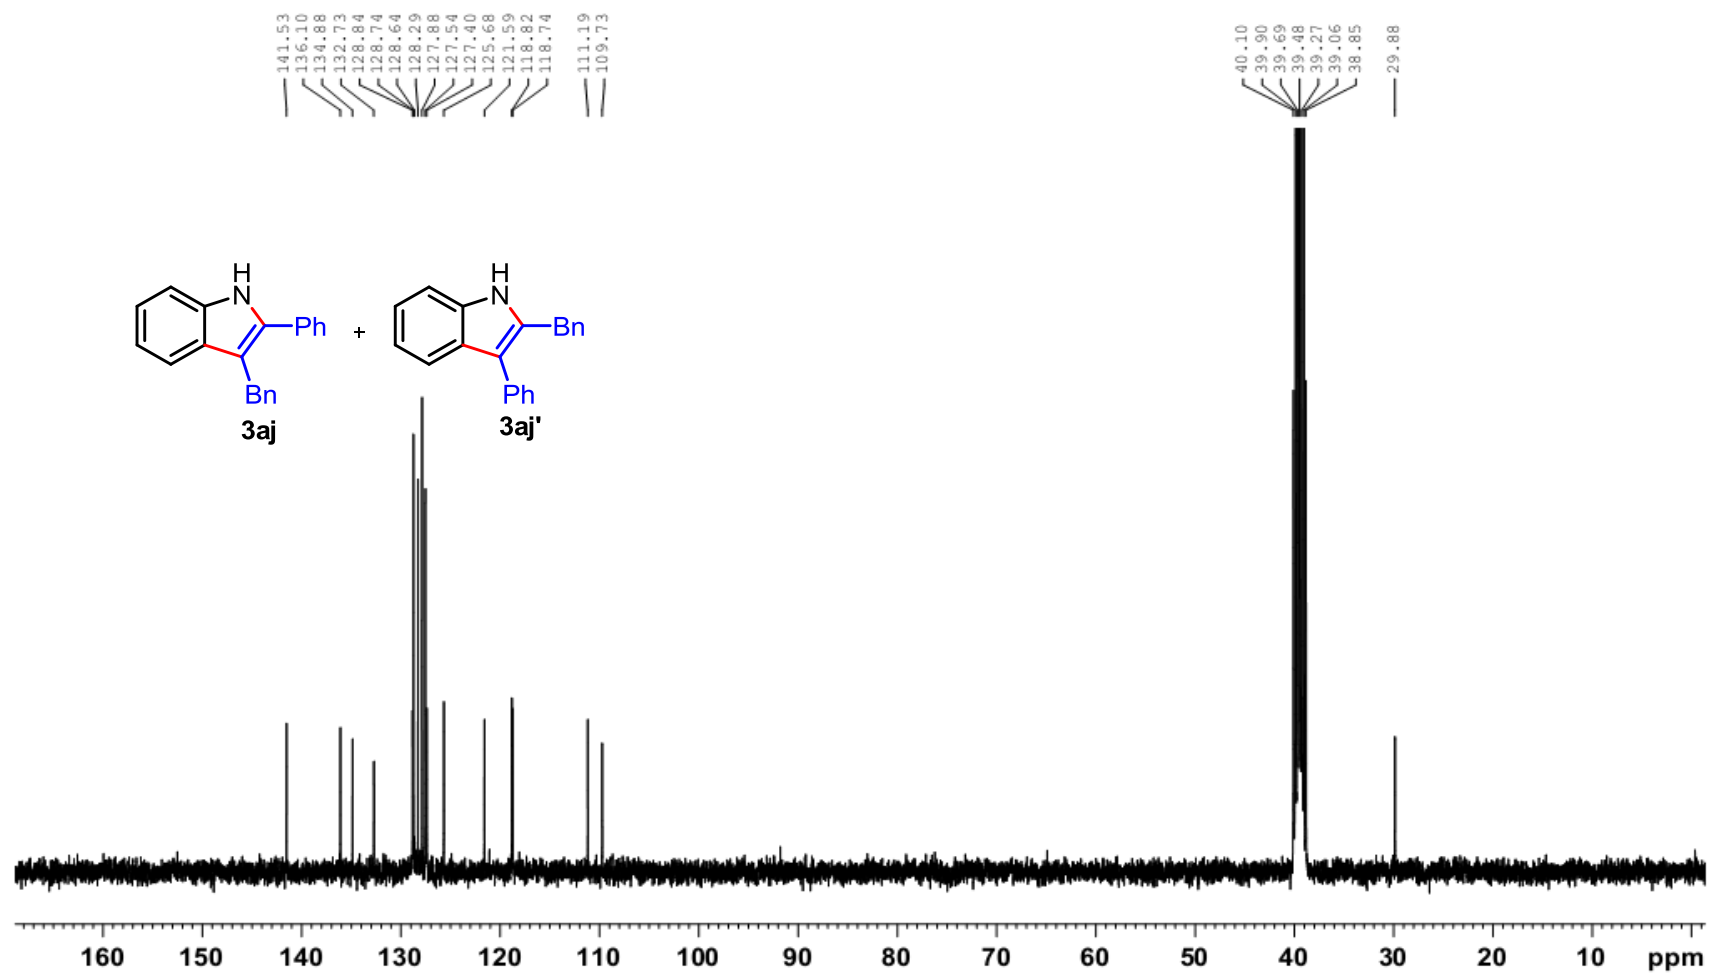

ZGY-130916-2-HNMR

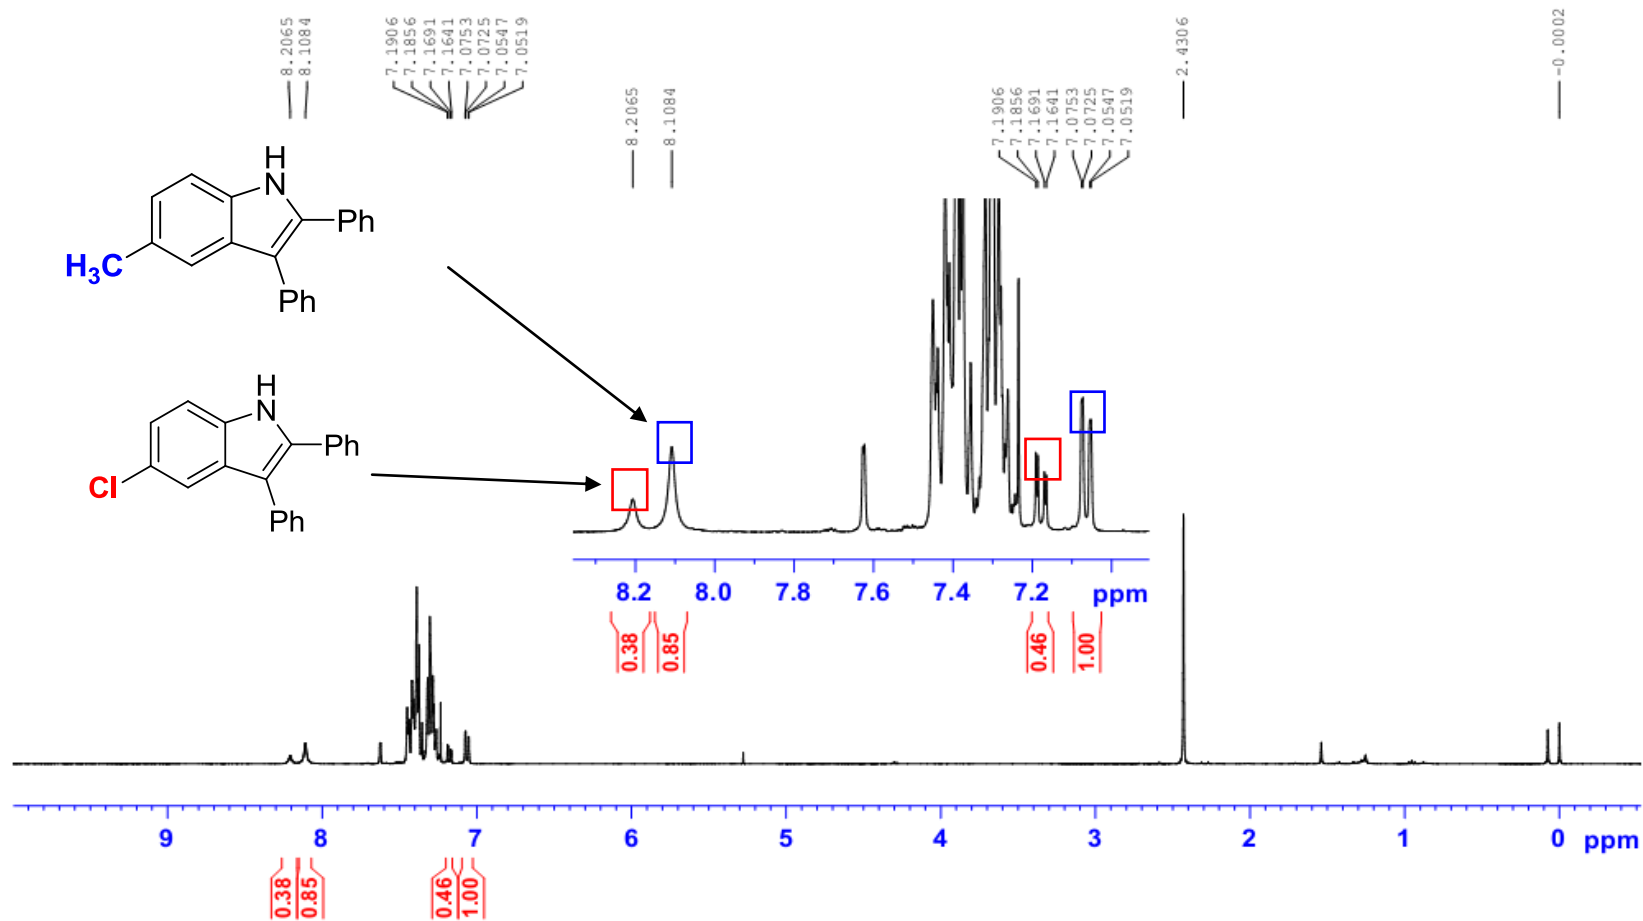



11-10-ZhangCY-HNMR

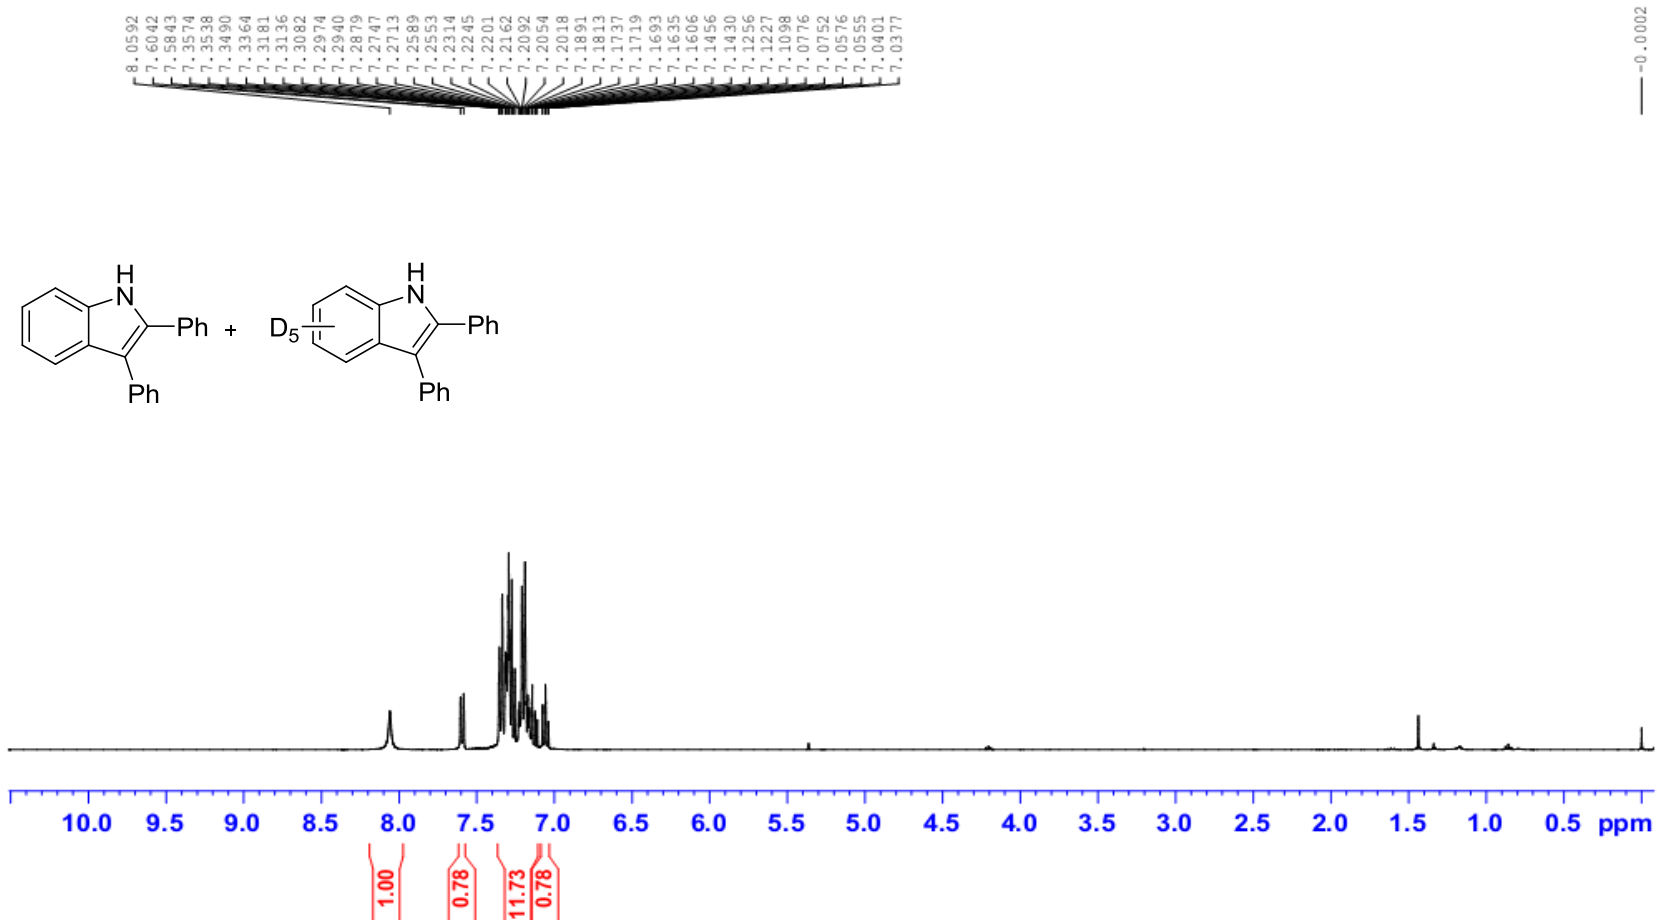

Supplement: c3cc49751h1.pdf [file c3cc49751h1.pdf]
